# Supplementary material for: Copper-catalyzed ortho-C(sp2)–H amination of benzamides and picolinamides with alkylamines using oxygen as a green oxidant
Source: Royal Society of Chemistry journal article supplement (doi:10.1039/d0ob00784f), 2020-01-01

## Supporting Information

### Copper-catalyzed *ortho*-C(sp<sup>2</sup>)-H amination of benzamides and picolinamides with alkylamines using oxygen as green oxidant

Qiong Li,<sup>a\*</sup> Jie Huang,<sup>a</sup> Gong Chen,<sup>b</sup> Shui-Bo Wang<sup>a</sup>

a School of Chemistry and Molecular Engineering, East China University of Science and Technology, Shanghai 200237, China.

E-mail: qul16@ecust.edu.cn

b State Key Laboratory and Institute of Elemento-Organic Chemistry, College of Chemistry, Nankai University, Tianjin 300071, China.

1. Optimization of Cu-catalyzed C–H amination of N-quinolinybenzocarboxamide with morpholine S1
2. Preliminary mechanistic experiments S1
3. NMR spectra S5

## 1. Optimization of Cu-catalyzed C–H amination of N-quinolinybenzocarboxamide with morpholine<sup>a</sup>

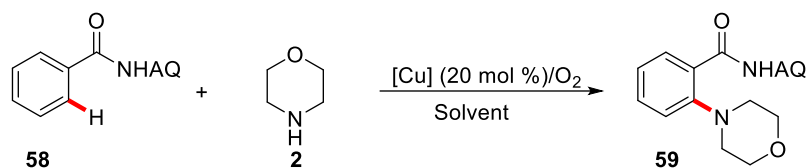

| entry           | Cat./O <sub>2</sub>  | solvent        | T (°C)     | yield (%) <sup>b</sup> |
|-----------------|----------------------|----------------|------------|------------------------|
| 1               | Cu(OAc) <sub>2</sub> | toluene        | 110        | 11                     |
| 2               | Cu(OTf) <sub>2</sub> | toluene        | 110        | trace                  |
| 3               | CuOAc                | toluene        | 110        | 10                     |
| 4               | CuCl                 | toluene        | 110        | 33                     |
| 5               | CuBr                 | toluene        | 110        | 38                     |
| 6               | CuI                  | toluene        | 110        | 37                     |
| 7               | CuBr                 | MeCN           | 110        | 10                     |
| <b>8</b>        | <b>CuBr</b>          | <b>dioxane</b> | <b>110</b> | <b>65</b>              |
| 9               | CuBr                 | THF            | 110        | 57                     |
| 10              | CuBr                 | DMF            | 110        | trace                  |
| 11              | CuBr                 | xylene         | 110        | 18                     |
| 12 <sup>c</sup> | CuBr                 | dioxane        | 110        | 49                     |
| 13 <sup>d</sup> | CuBr                 | dioxane        | 110        | <2                     |

<sup>a</sup>Reactions conditions: N-quinolinybenzocarboxamide **58** (0.2 mmol, 1.0 equiv), morpholine **2** (0.4 mmol, 2.0 equiv) and copper catalyst (0.04 mmol, 0.2 equiv) in solvent (1 mL) under Oxygen for 12 h in a sealed tube. <sup>b</sup>Isolated yield. <sup>c</sup>Air instead of oxygen. <sup>d</sup>Under Ar atmosphere.

A mixture of N-quinolinybenzocarboxamide **58** (0.2 mmol, 1.0 equiv), copper catalyst (0.04 mmol, 0.2 equiv) and morpholine **2** (0.4 mmol, 2.0 equiv) in toluene (1.0 mL) in a 10 mL glass vial (purged with O<sub>2</sub>, sealed with PTFE cap) was heated at 110 °C for 12 hours. The reaction mixture was cooled to RT. The resulting residue was purified by silica gel flash chromatography (PE/EtOAc) to give the amination product **59**.

## 2. Preliminary mechanistic experiments

### 2-1 Parellel kinetic isotope effect of Picolinamide

A mixture of picolinamide **1** (39.6 mg, 0.2 mmol, 1.0 equiv), CuCl (4.0 mg, 0.04 mmol, 0.2 equiv) and morpholine **2** (34.8 μL, 0.4 mmol, 2.0 equiv) in toluene (1.0 mL) in a 10 mL glass vial (purged with O<sub>2</sub>, sealed with PTFE cap) was heated at 110 °C. The reaction mixture was cooled to RT. The resulting residue was purified by silica gel flash chromatography (PE/EtOAc 8:1) to give the amination product **3**.

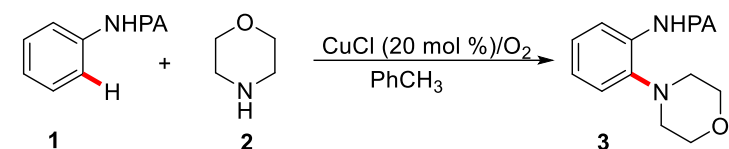

| entry | time(min) | yield(%) |
|-------|-----------|----------|
| 1     | 10        | 28       |
| 2     | 30        | 35       |
| 3     | 60        | 49       |
| 4     | 90        | 51       |
| 5     | 120       | 65       |

Another mixture of N-(phenyl-d<sub>5</sub>)picolinamide **56** (40.7 mg, 0.2 mmol, 1.0 equiv), CuCl (4.0 mg, 0.04 mmol, 0.2 equiv) and morpholine **2** (34.8  $\mu$ L, 0.4 mmol, 2.0 equiv) in toluene (1.0 mL) in a 10 mL glass vial (purged with O<sub>2</sub>, sealed with PTFE cap) was heated at 110 °C. The reaction mixture was cooled to RT. The resulting residue was purified by silica gel flash chromatography (PE/EtOAc 8:1) to give the amination product **57**.

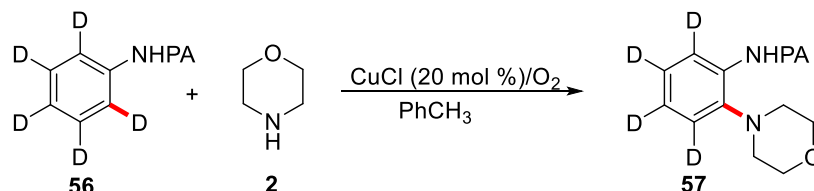

| entry | time(min) | yield(%) |
|-------|-----------|----------|
| 1     | 10        | 27       |
| 2     | 30        | 37       |
| 3     | 60        | 43       |
| 4     | 90        | 44       |
| 5     | 120       | 59       |

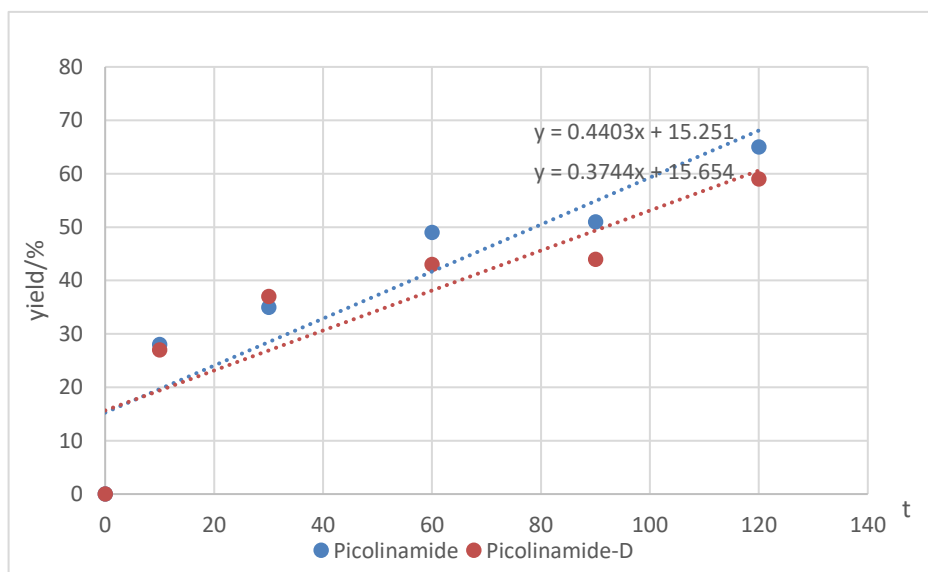

**KIE:**  $k_H/k_D = 0.4403/0.3744 = 1.18$

## 2-2 KIE of N-quinolinybenzocarboxamide

A mixture of N-quinolinybenzocarboxamide **58** (49.7 mg, 0.2 mmol, 1.0 equiv), CuBr (5.7 mg, 0.04 mmol, 0.2 equiv) and morpholine **2** (34.8  $\mu$ L, 0.4 mmol, 2.0 equiv) in dioxane (1.0 mL) in a 10 mL glass vial (purged with O<sub>2</sub>, sealed with PTFE cap) was heated at 110 °C. The reaction mixture was cooled to RT. The resulting residue was purified by silica gel flash chromatography (PE/EtOAc 10:1) to give the amination product **59**.

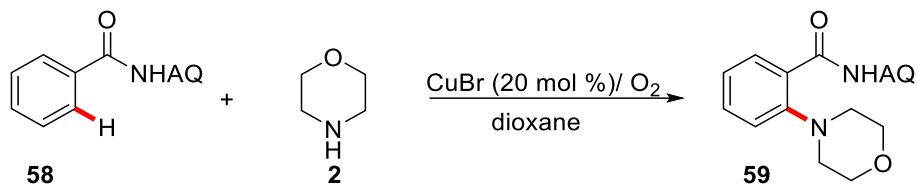

| entry | time(min) | yield(%) |
|-------|-----------|----------|
| 1     | 10        | 14       |
| 2     | 30        | 48       |
| 3     | 60        | 57       |
| 4     | 90        | 58       |
| 5     | 120       | 63       |

Another mixture of N-(quinolin-8-yl)benzamide-2,3,4,5,6-d<sub>5</sub> **60** (50.7 mg, 0.2 mmol, 1.0 equiv), CuBr (5.7 mg, 0.04 mmol, 0.2 equiv) and morpholine **2** (34.8  $\mu$ L, 0.4 mmol, 2.0 equiv) in dioxane (1.0 mL) in a 10 mL glass vial (purged with O<sub>2</sub>, sealed with PTFE cap) was heated at 110 °C. The reaction mixture was cooled to RT. The resulting residue was purified by silica gel flash chromatography (PE/EtOAc 10:1) to give the amination product **61**.

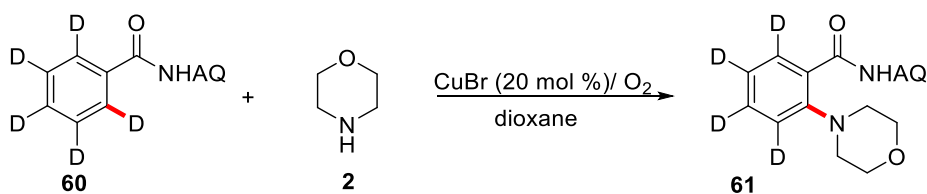

| entry | time(min) | yield(%) |
|-------|-----------|----------|
| 1     | 10        | 12       |
| 2     | 30        | 25       |
| 3     | 60        | 39       |
| 4     | 90        | 40       |
| 5     | 120       | 46       |

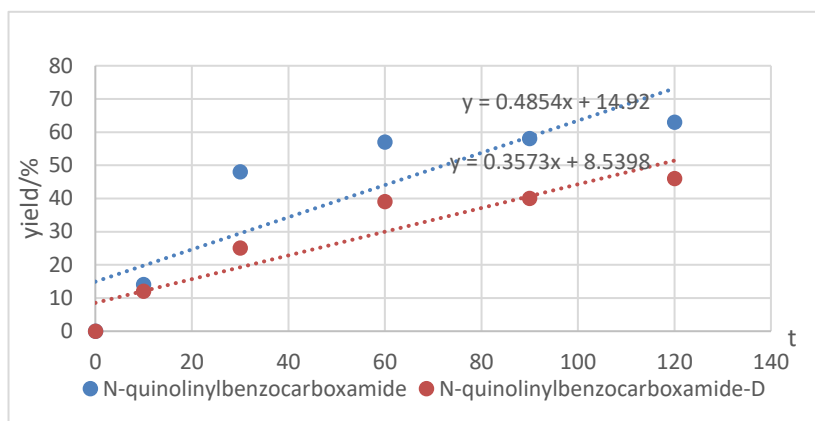

**KIE:**  $k_H/k_D = 0.4854/0.3573 = 1.36$

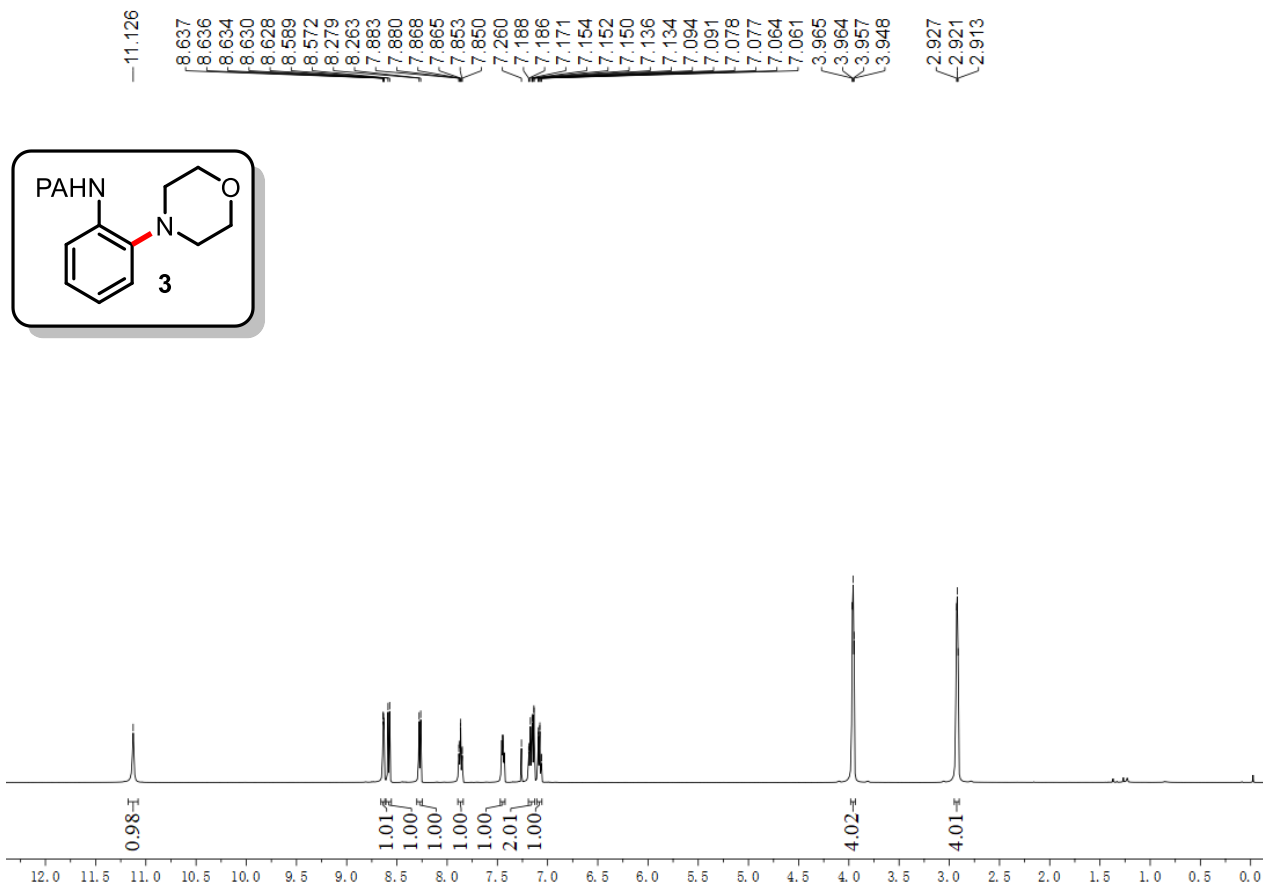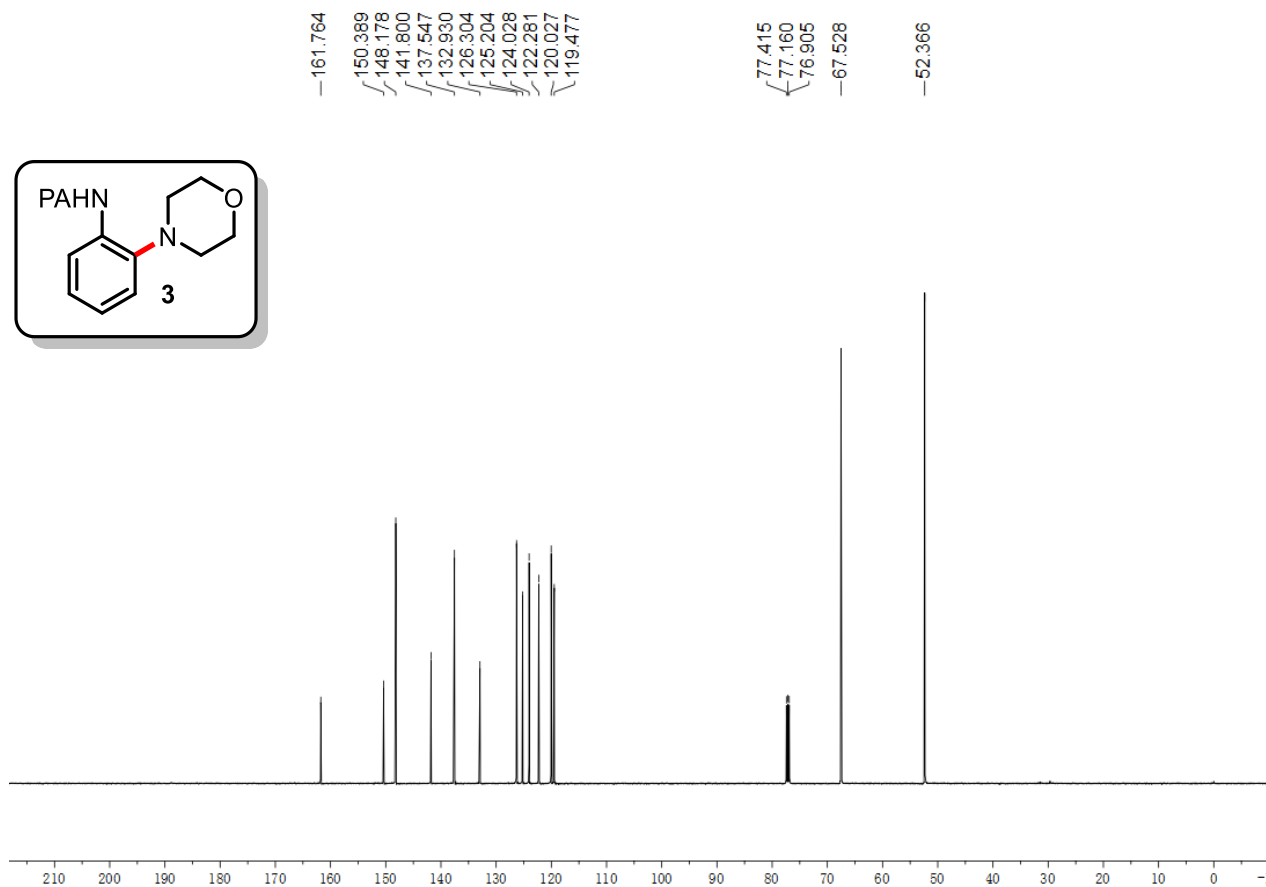

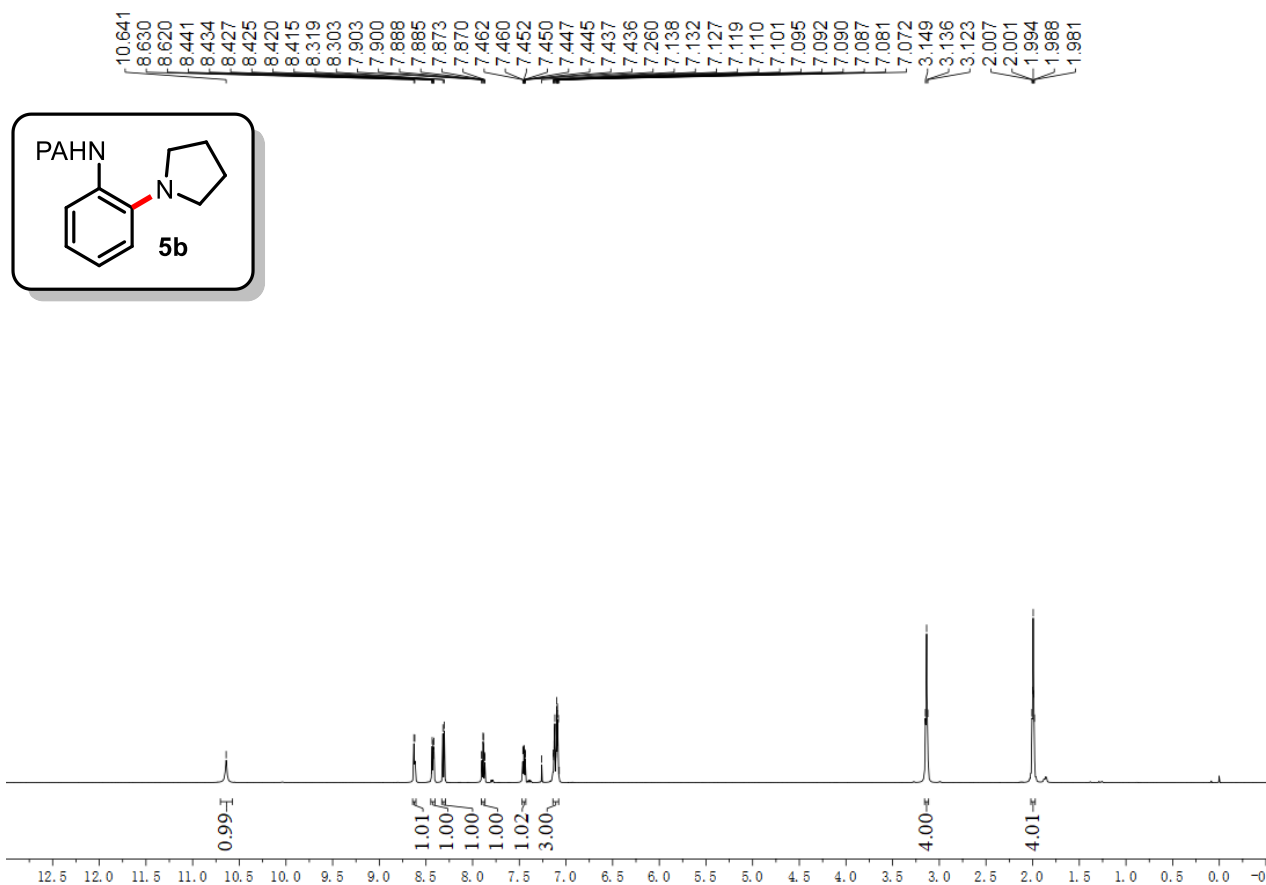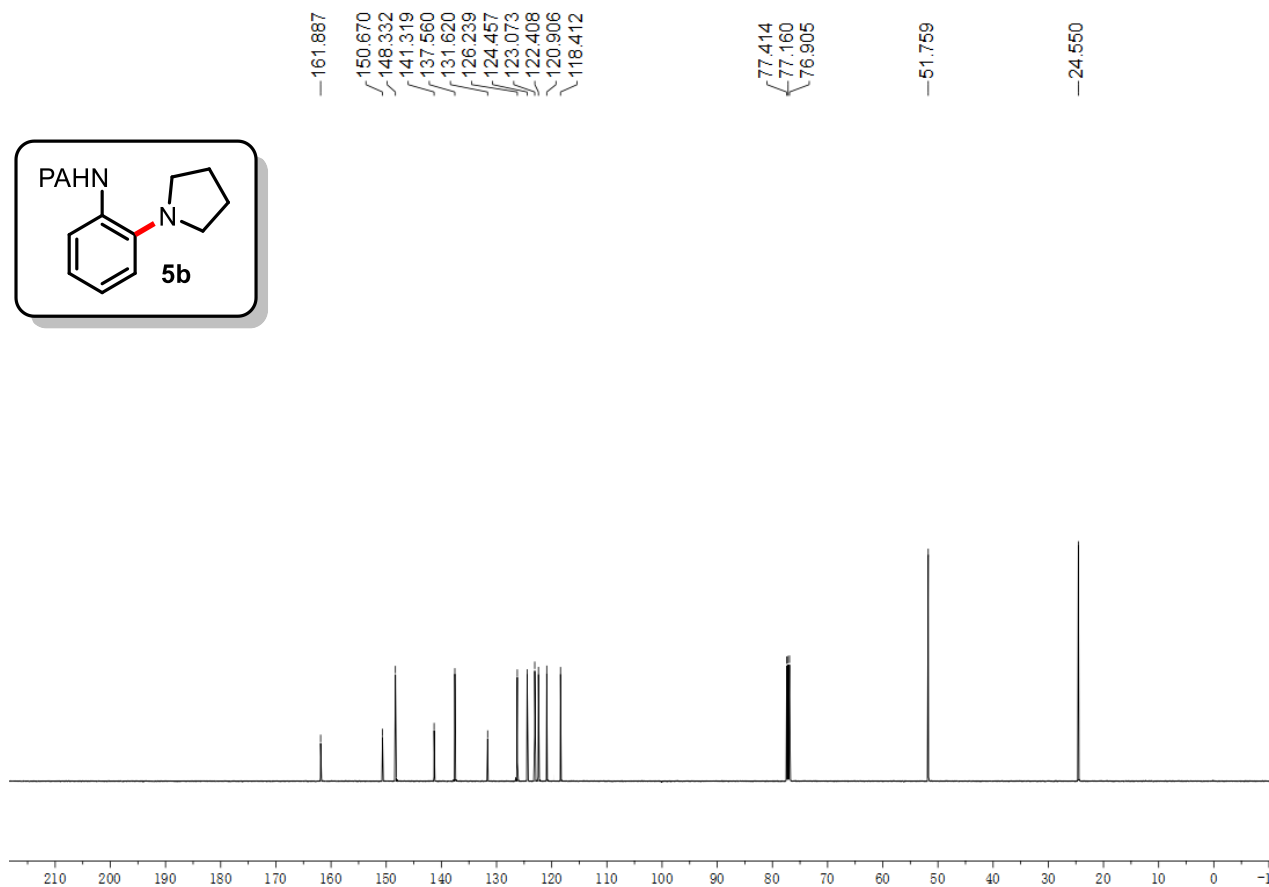

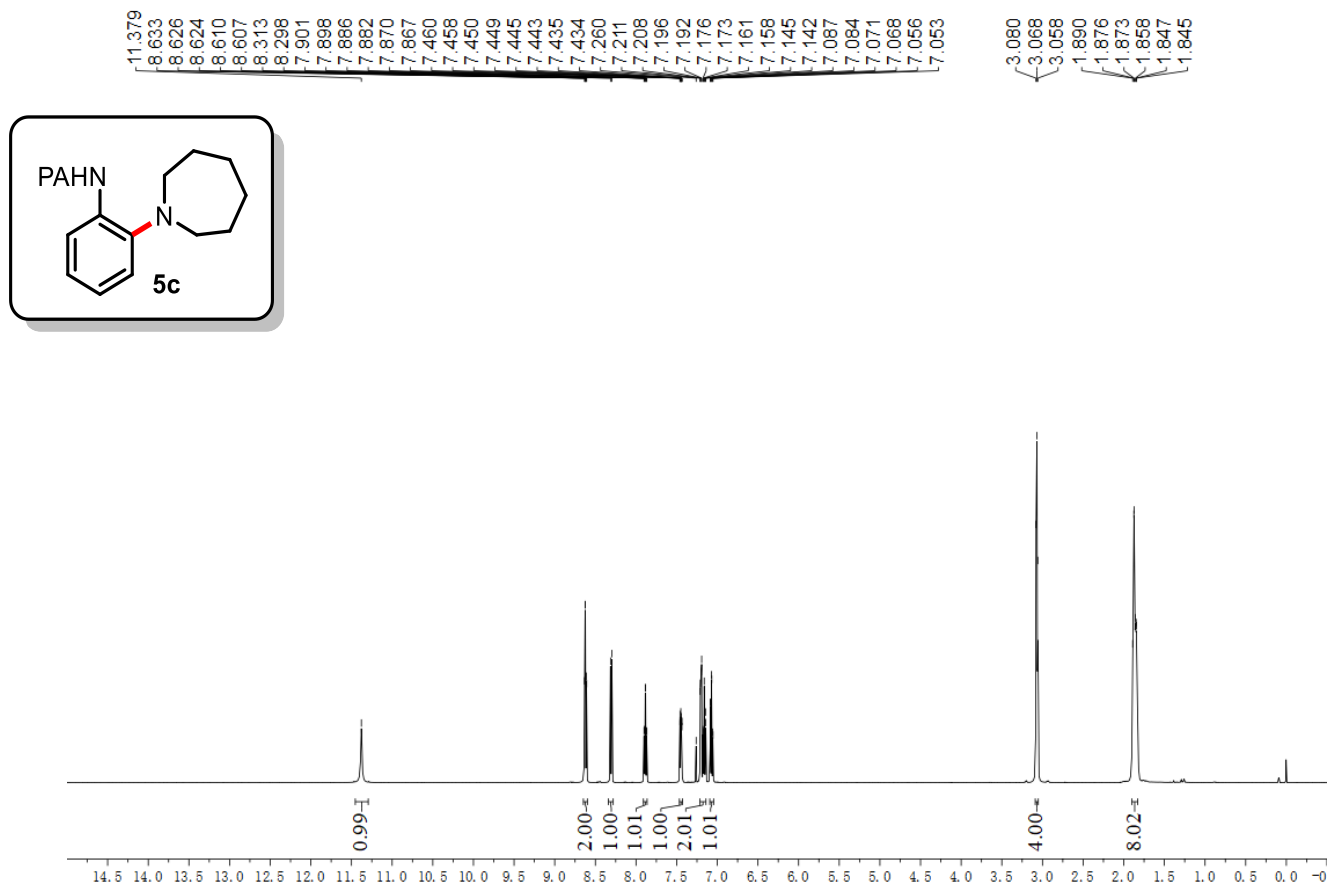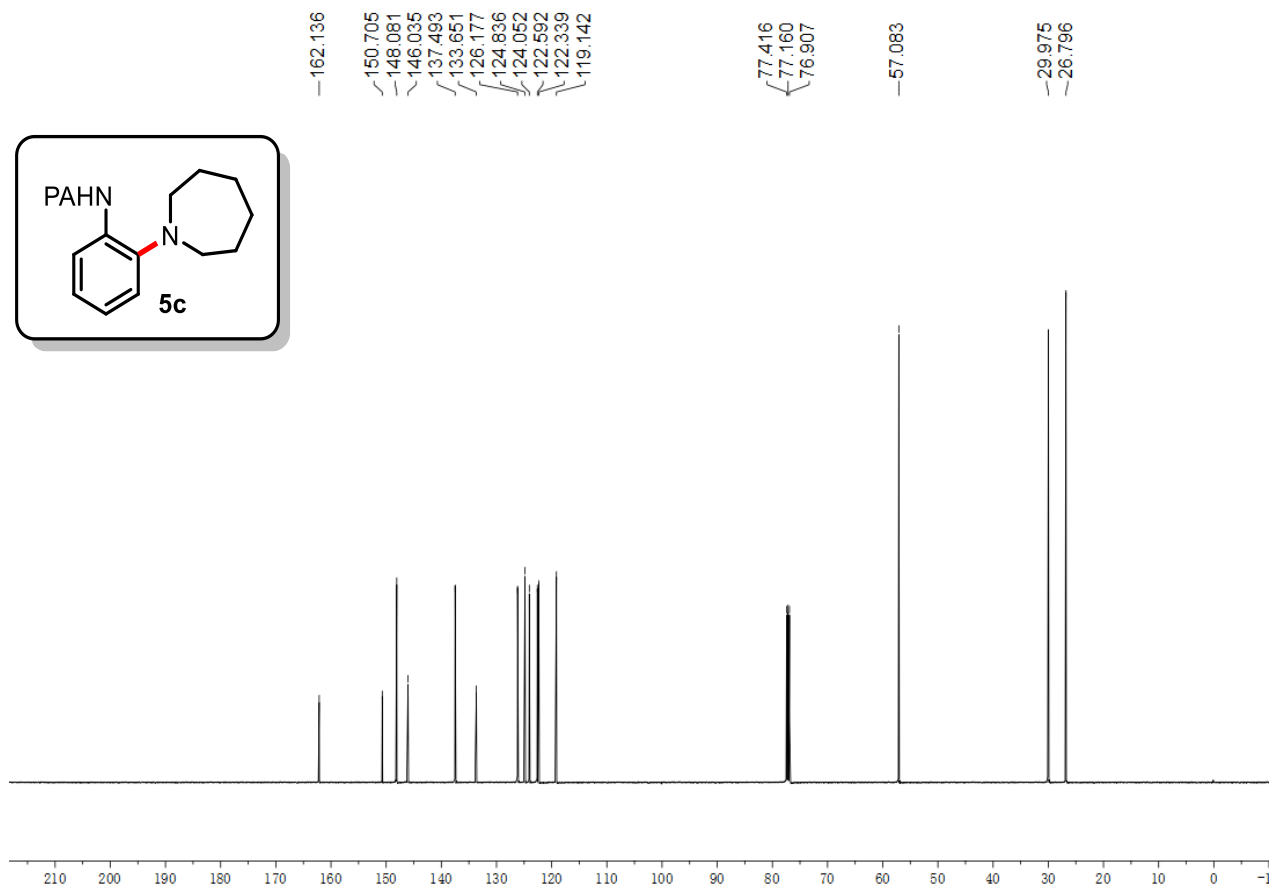



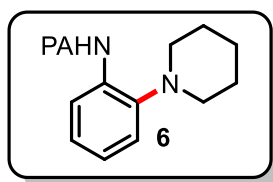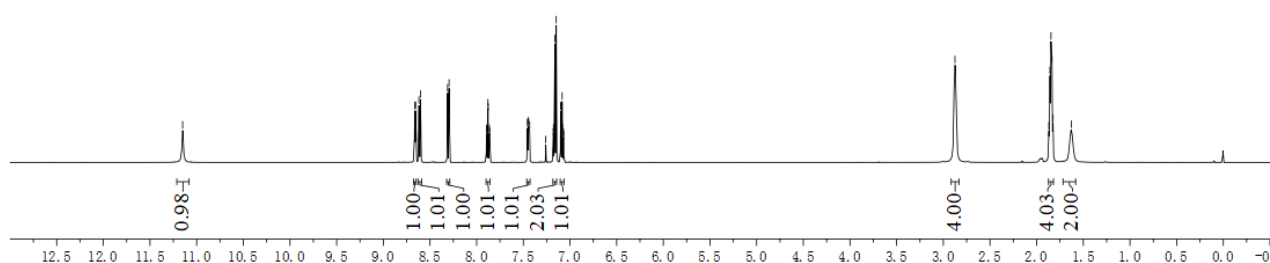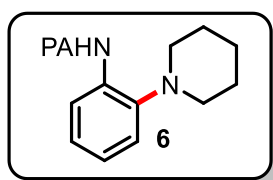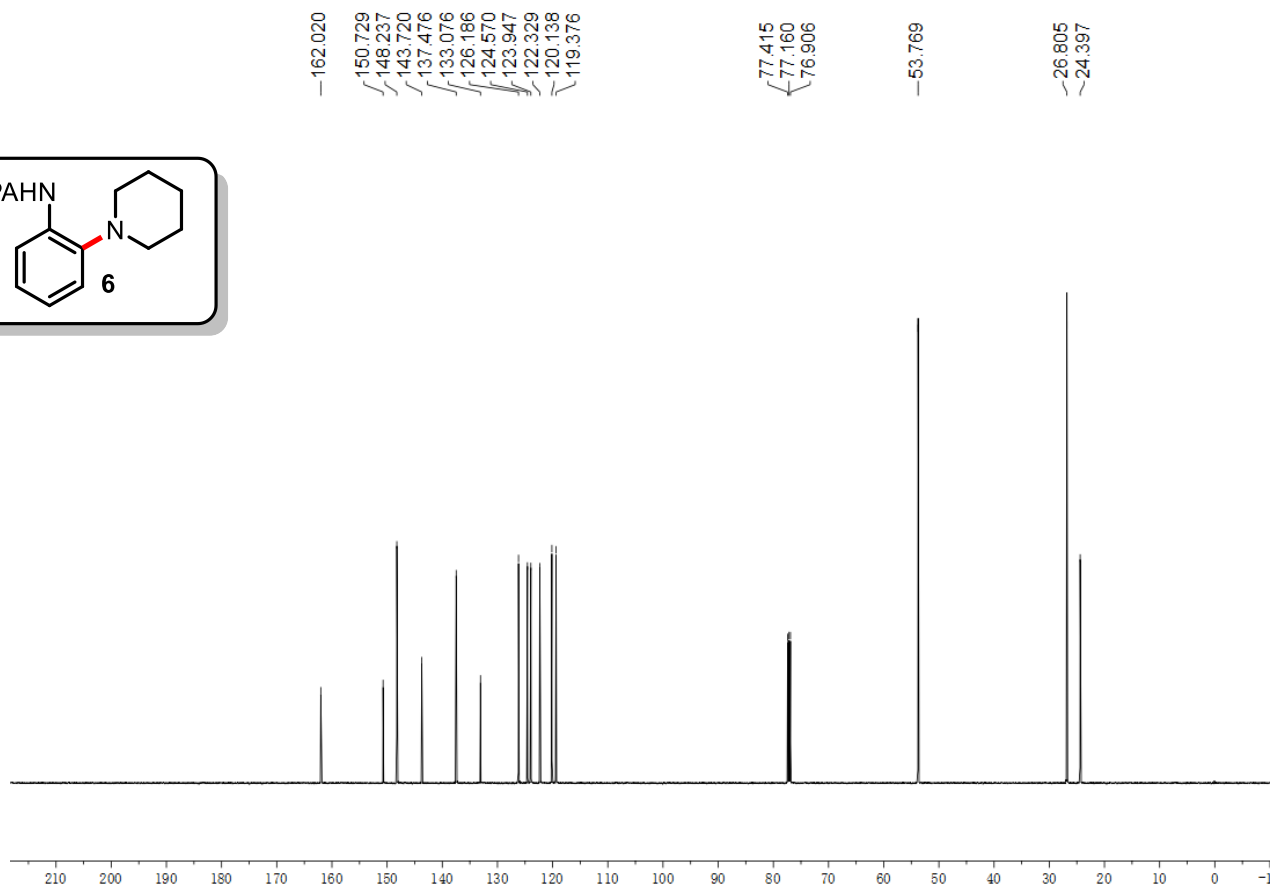

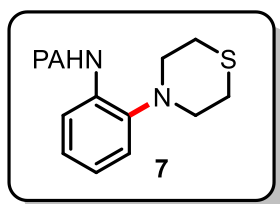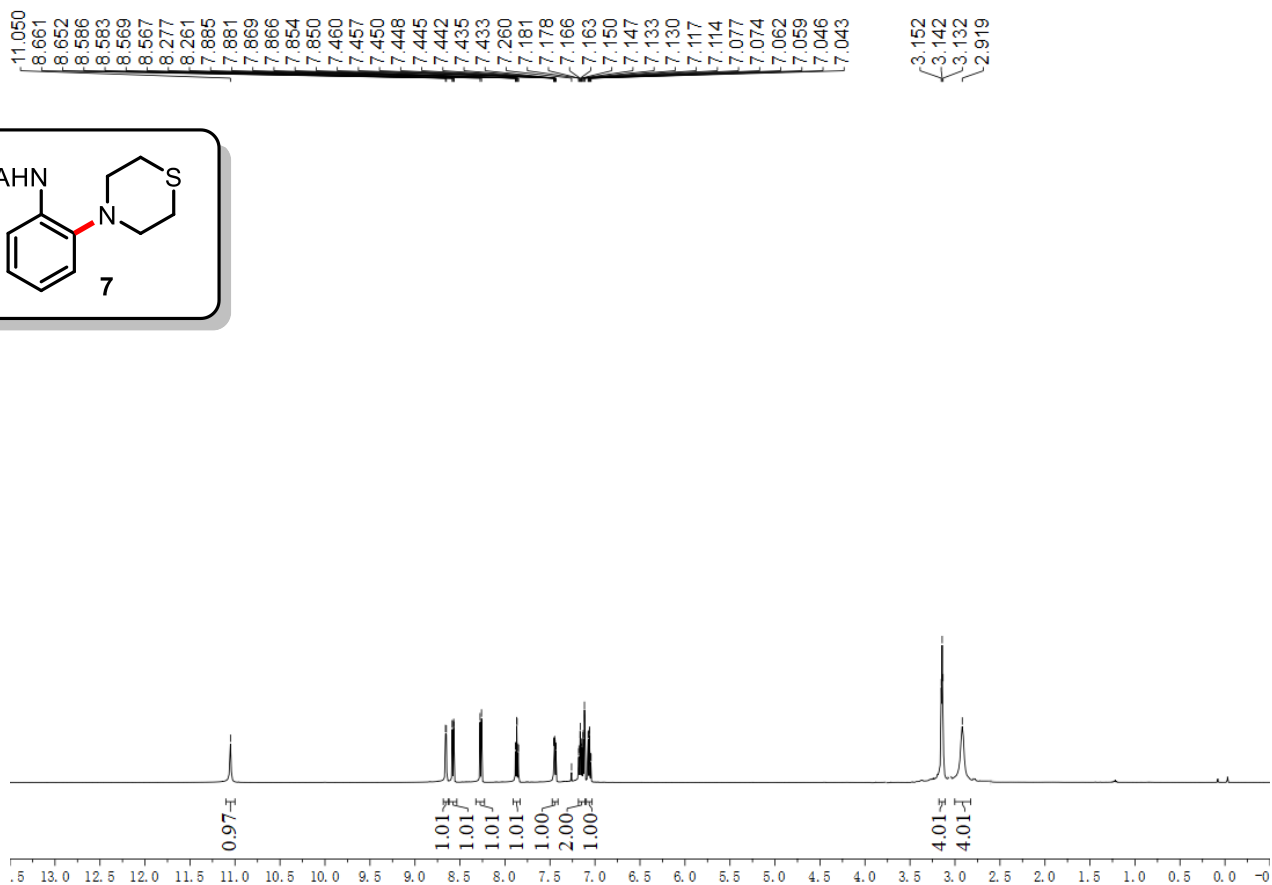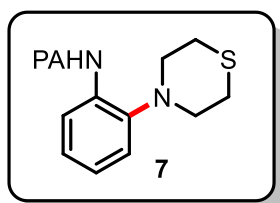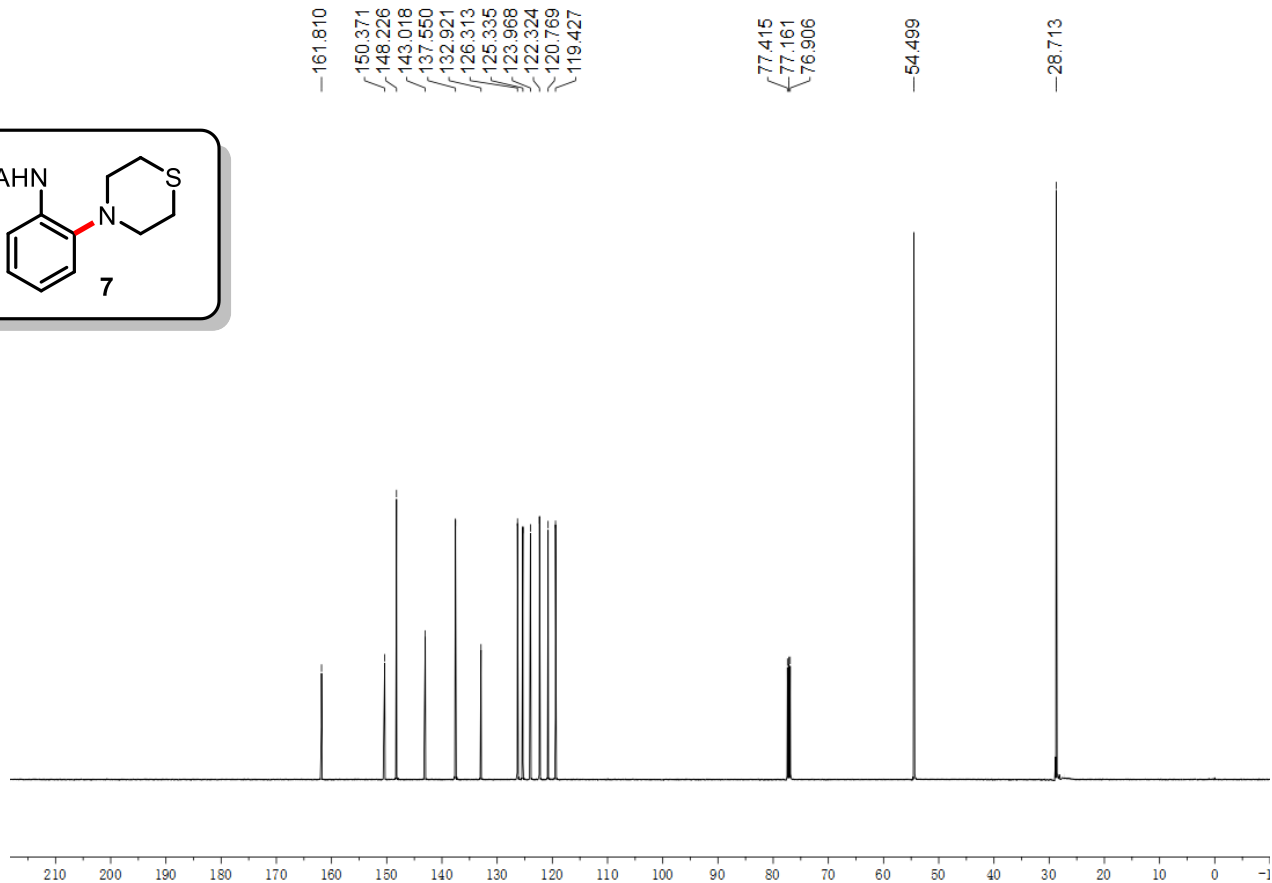

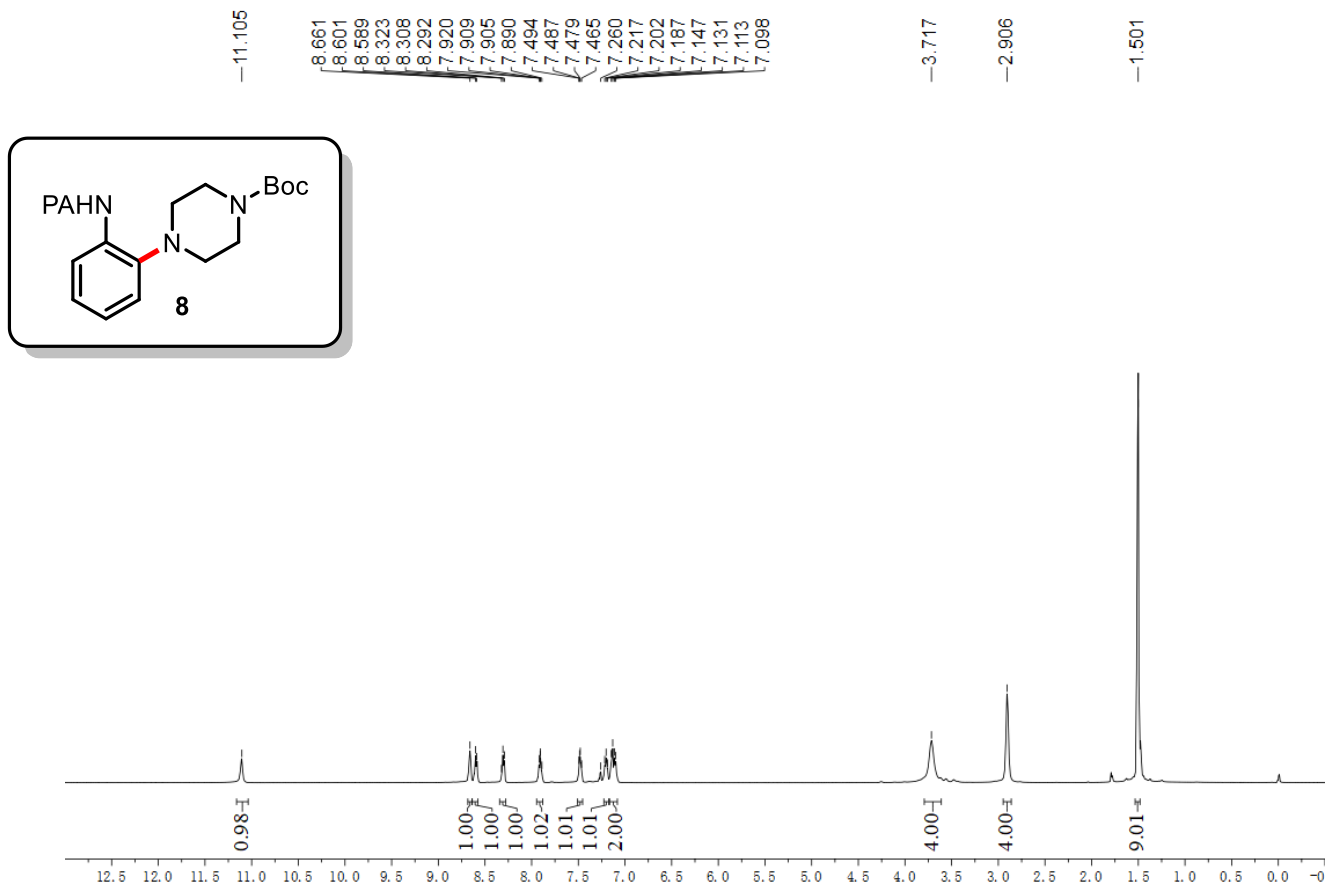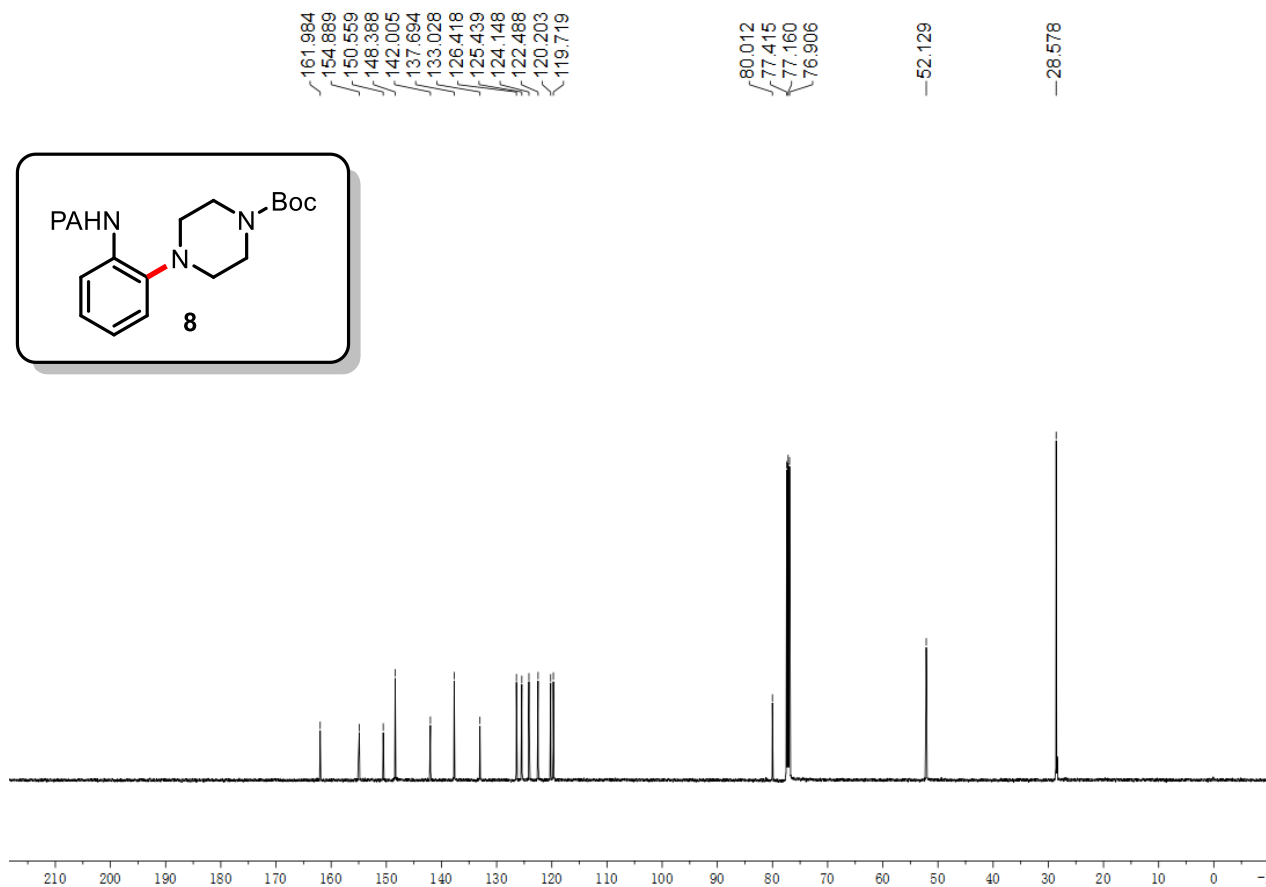

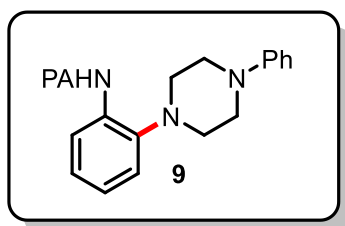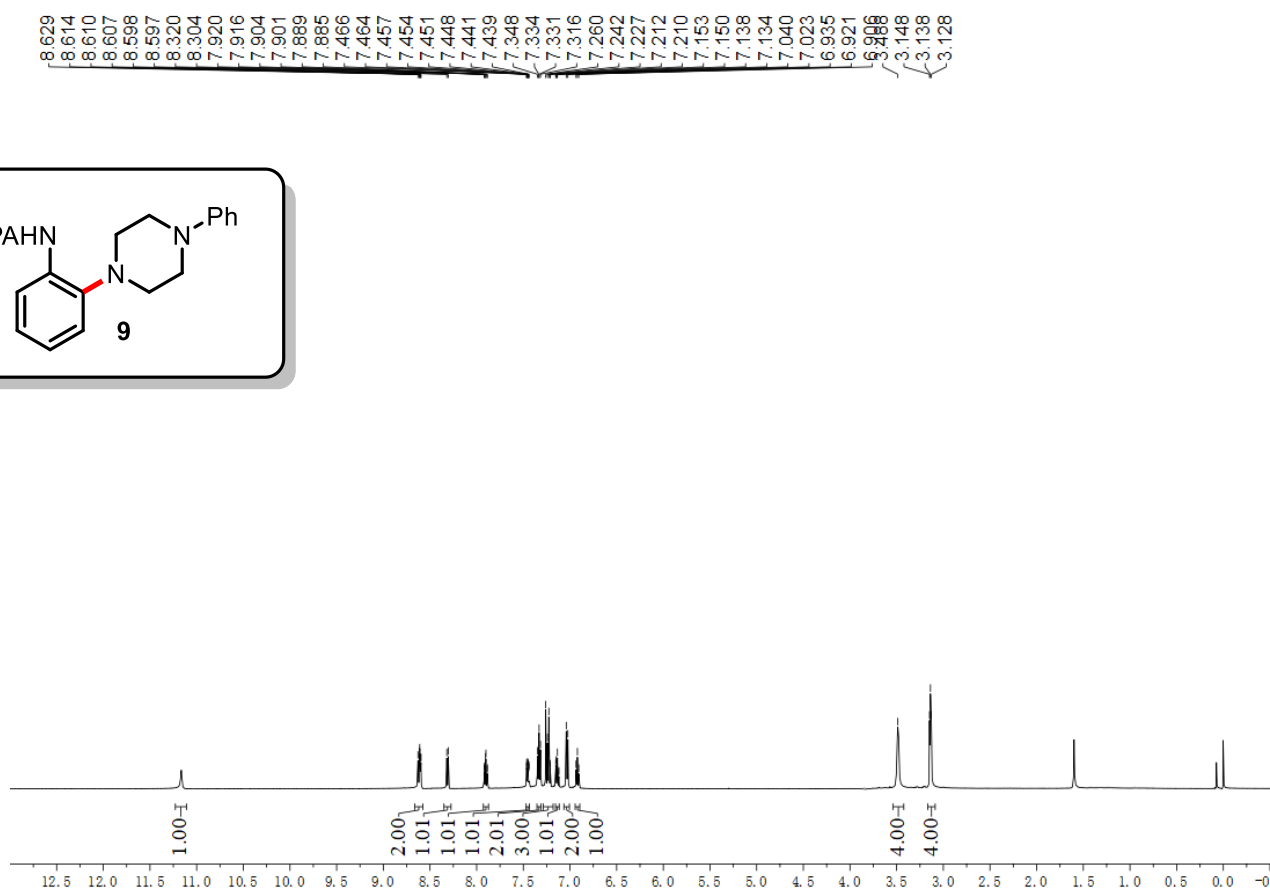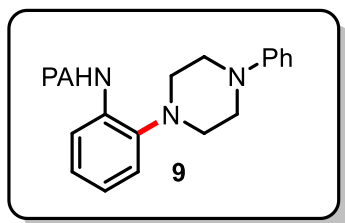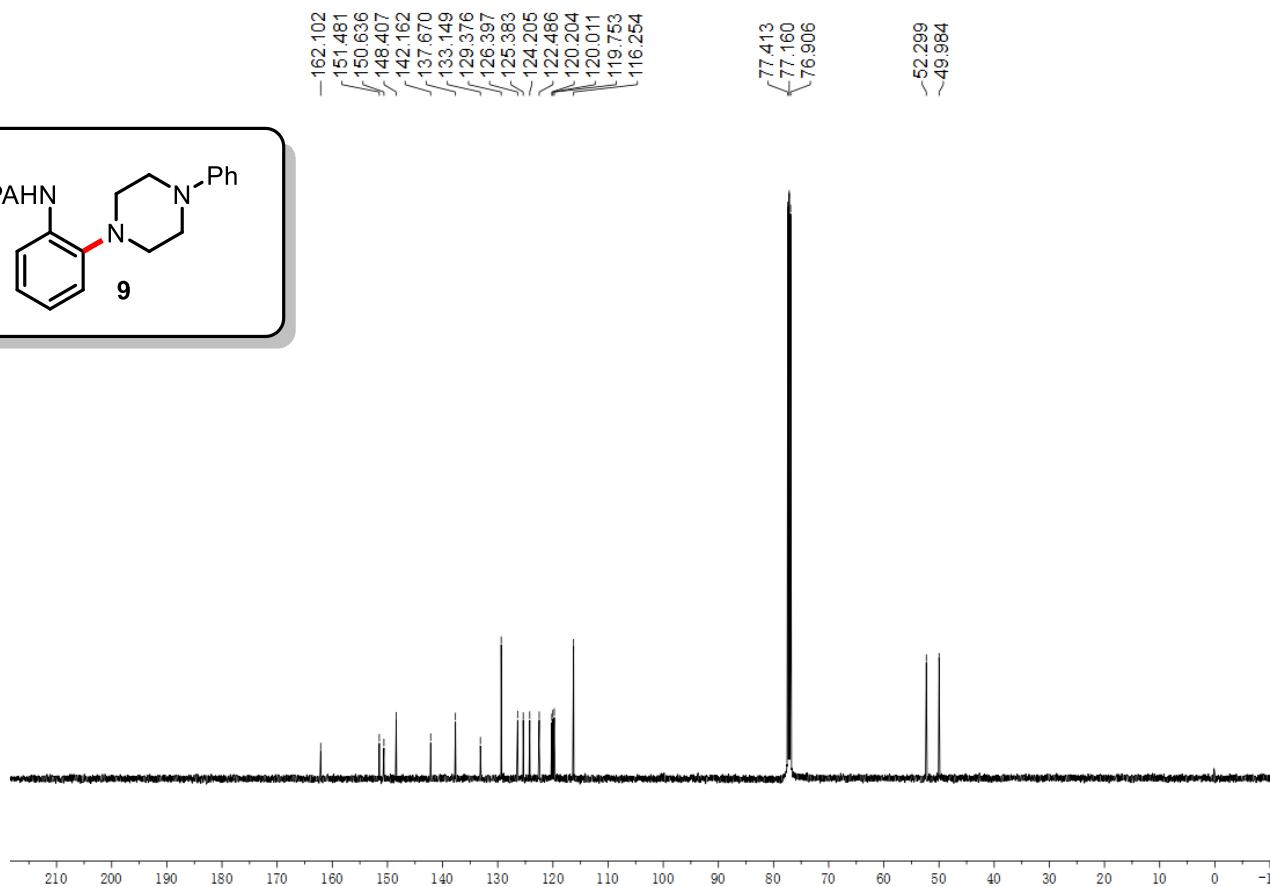

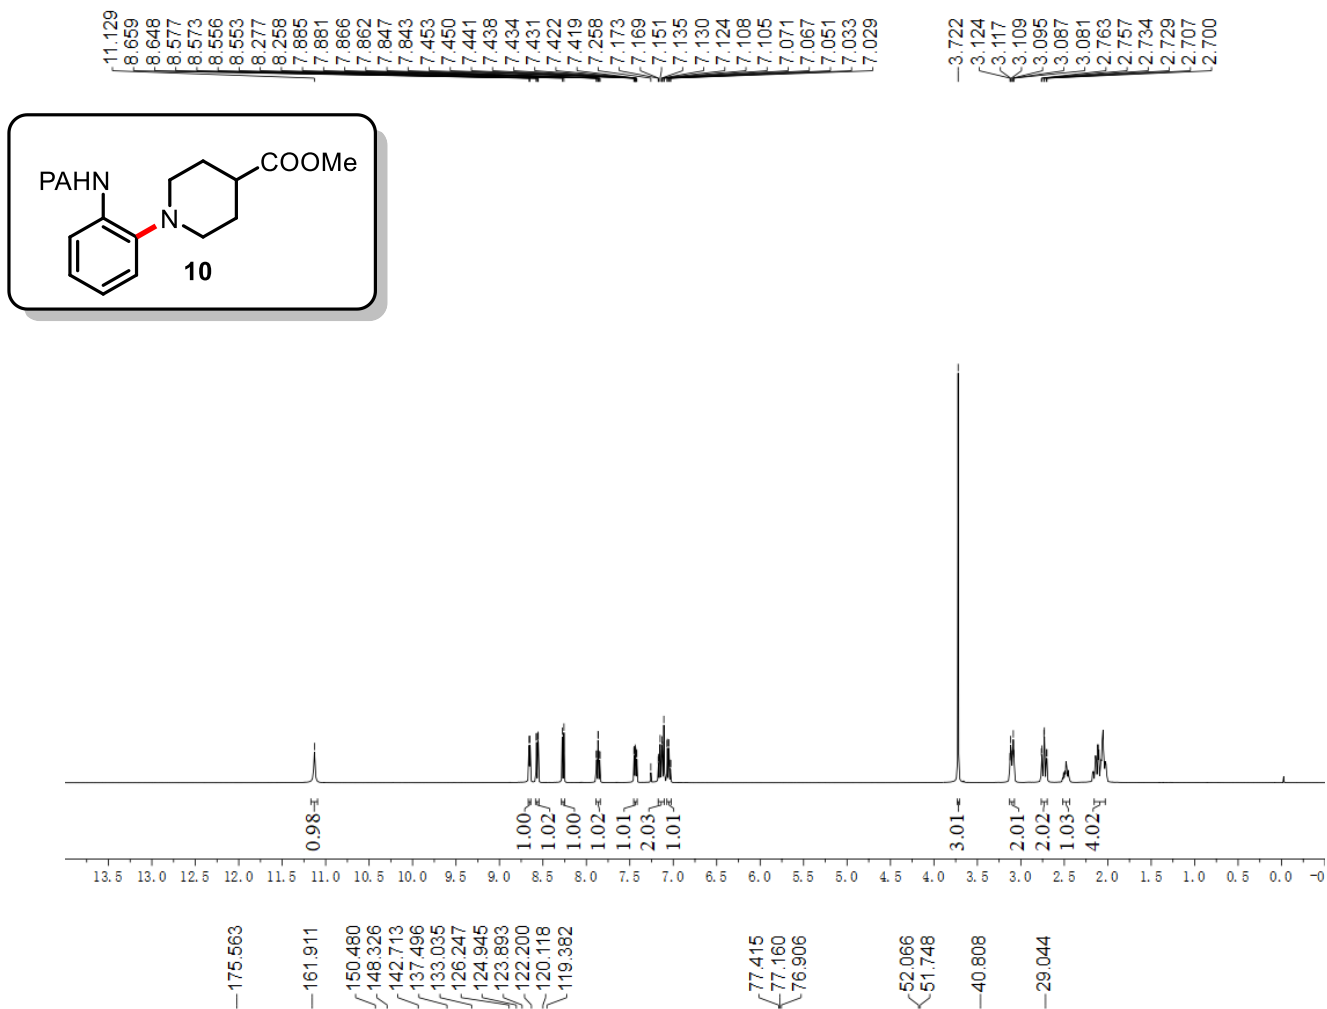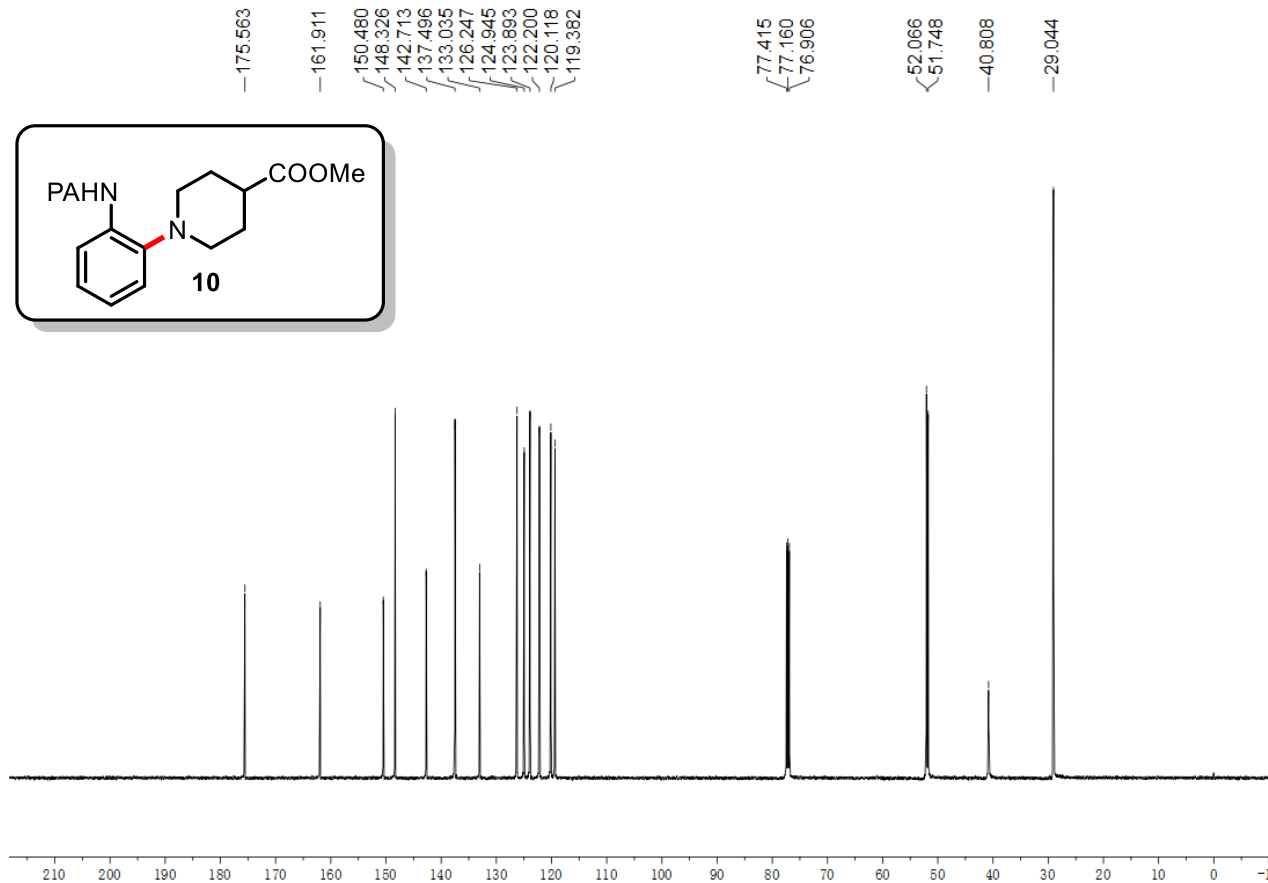

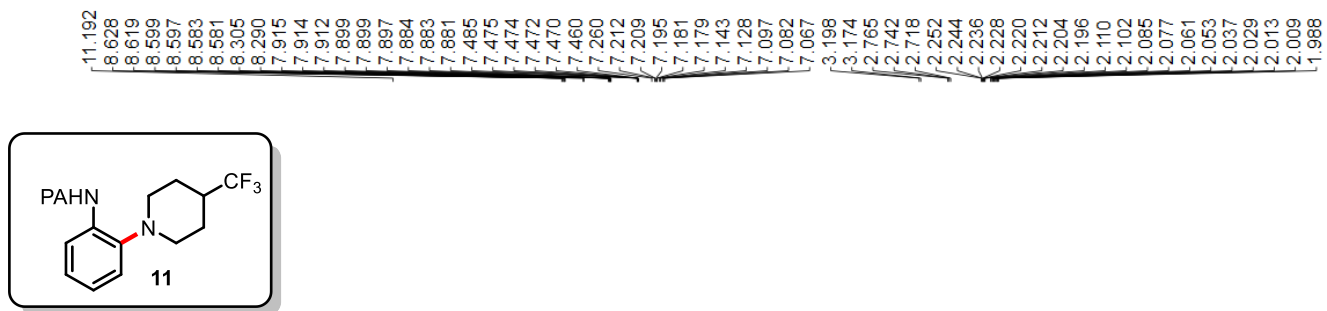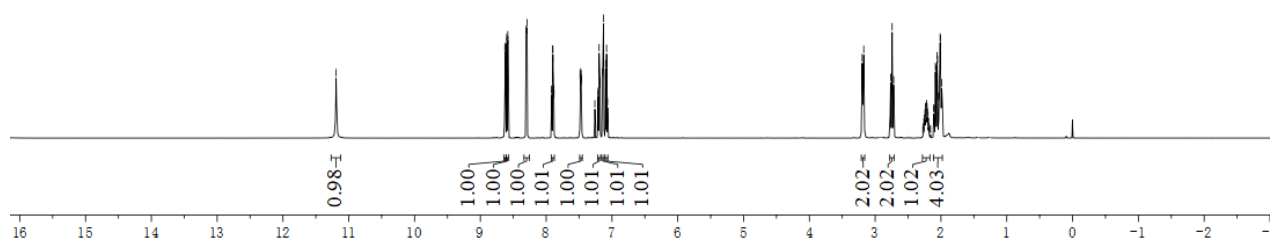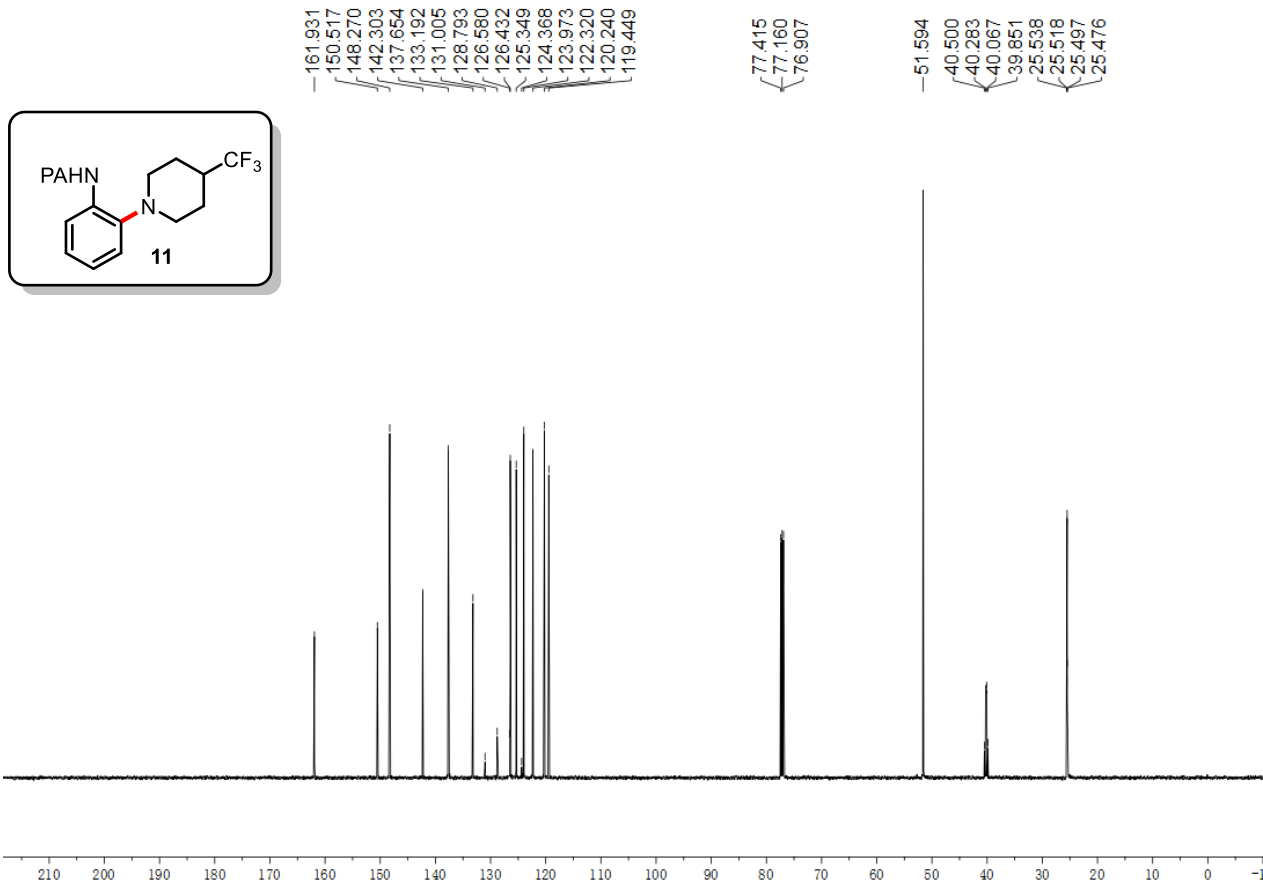

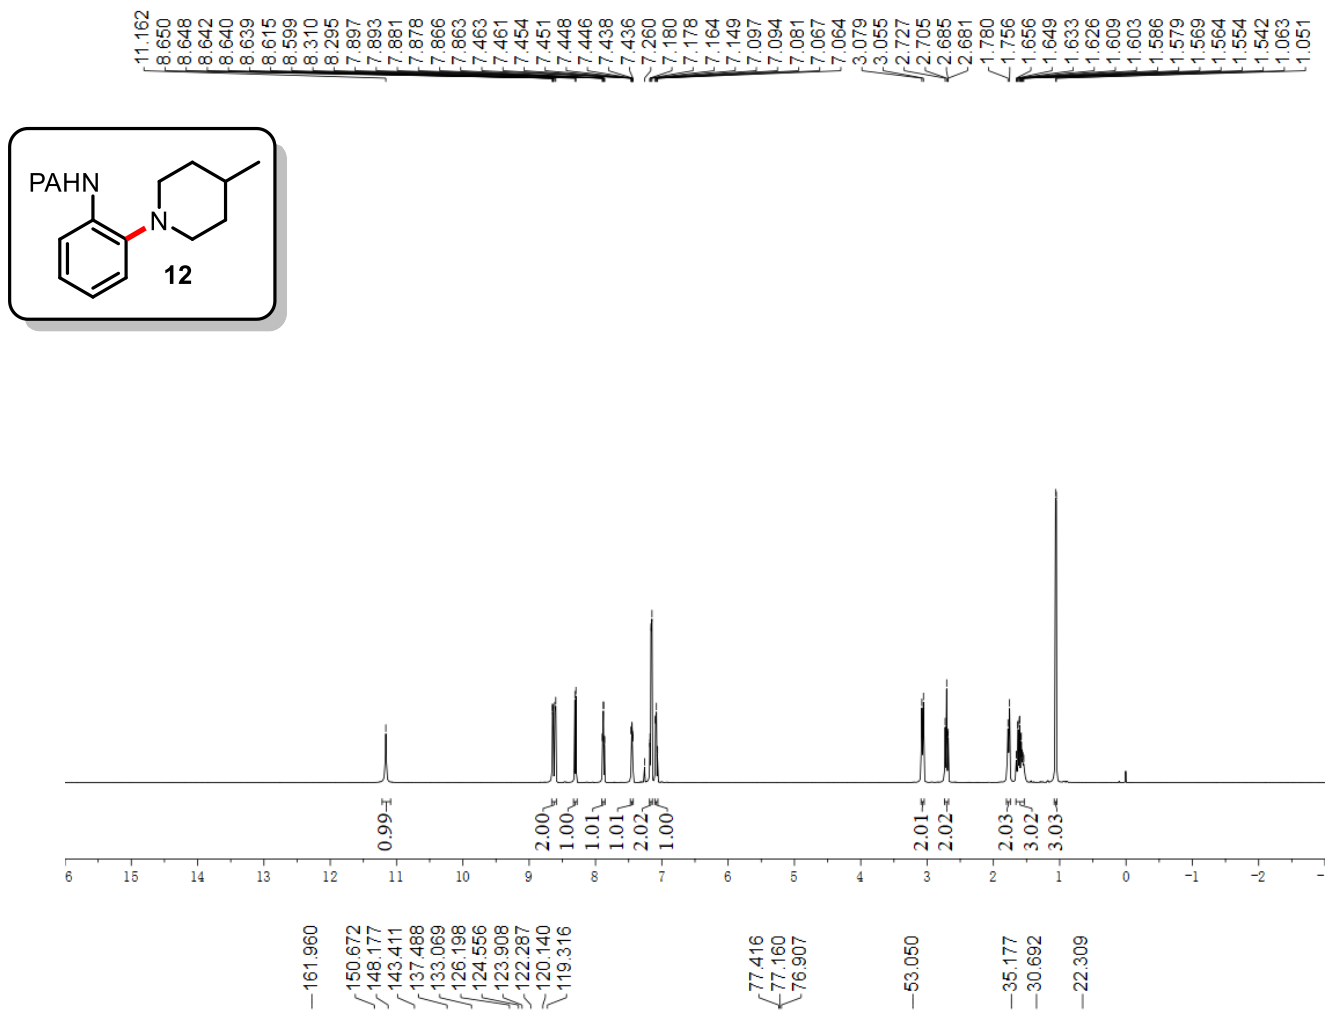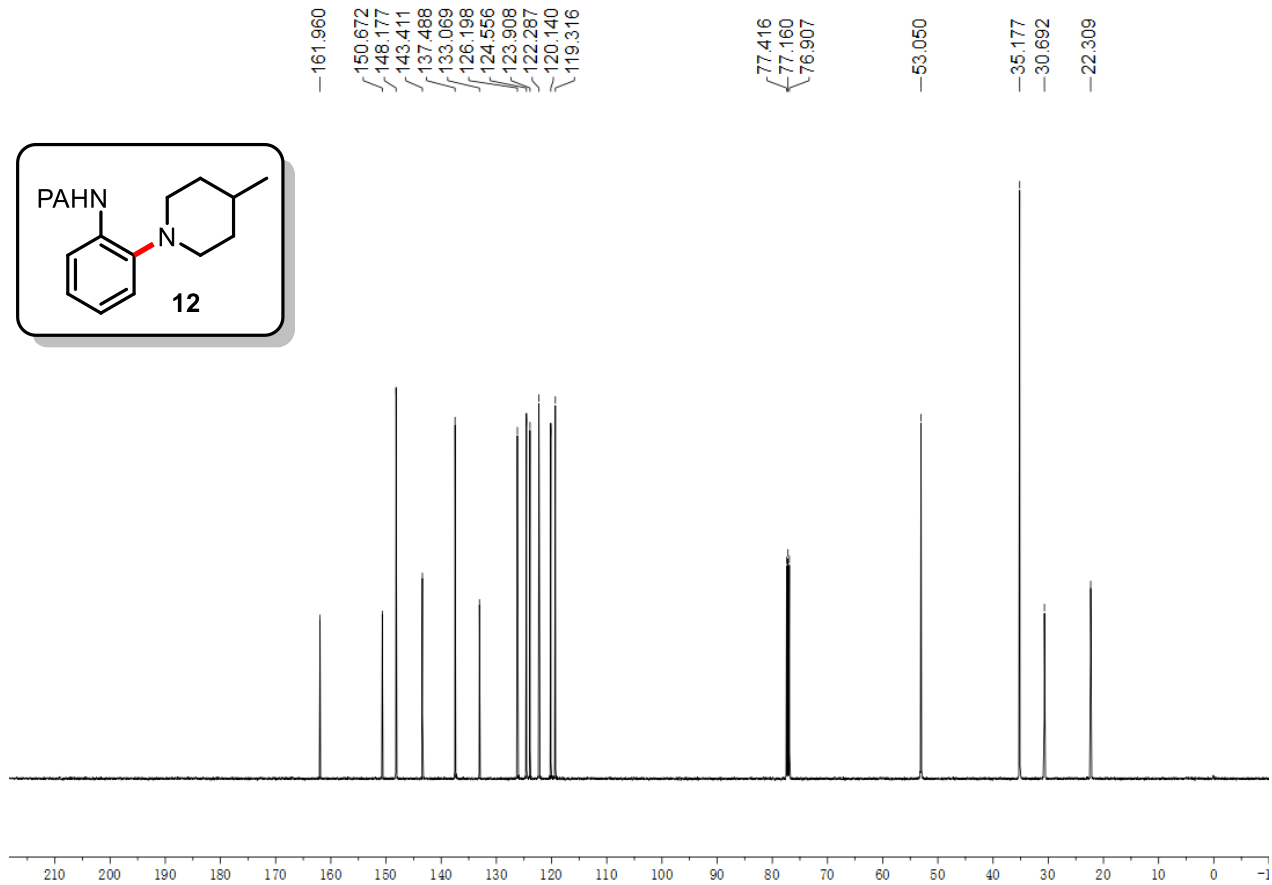

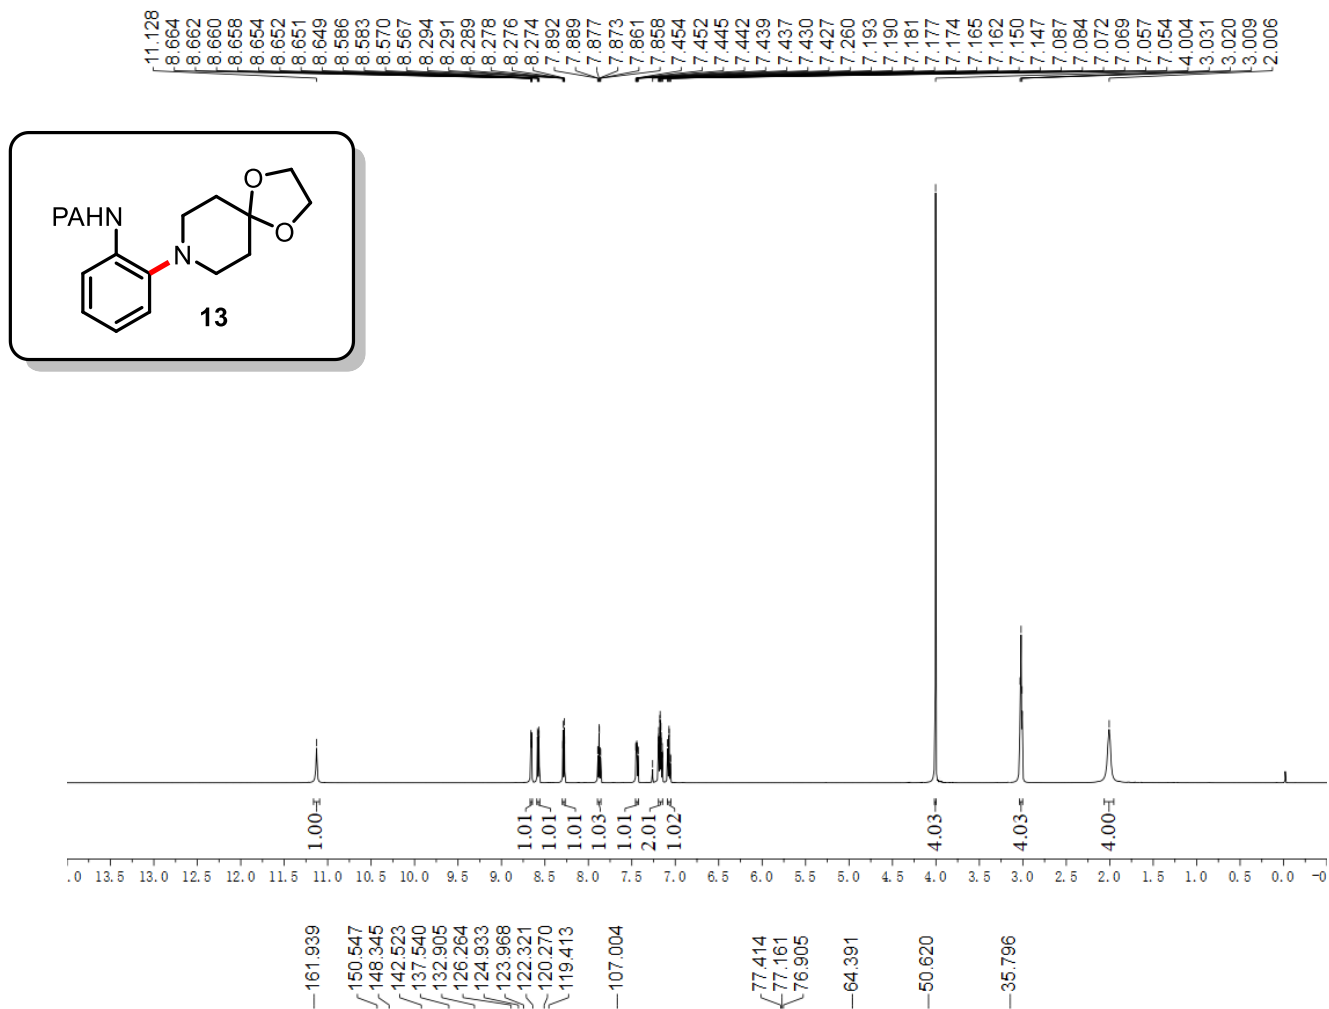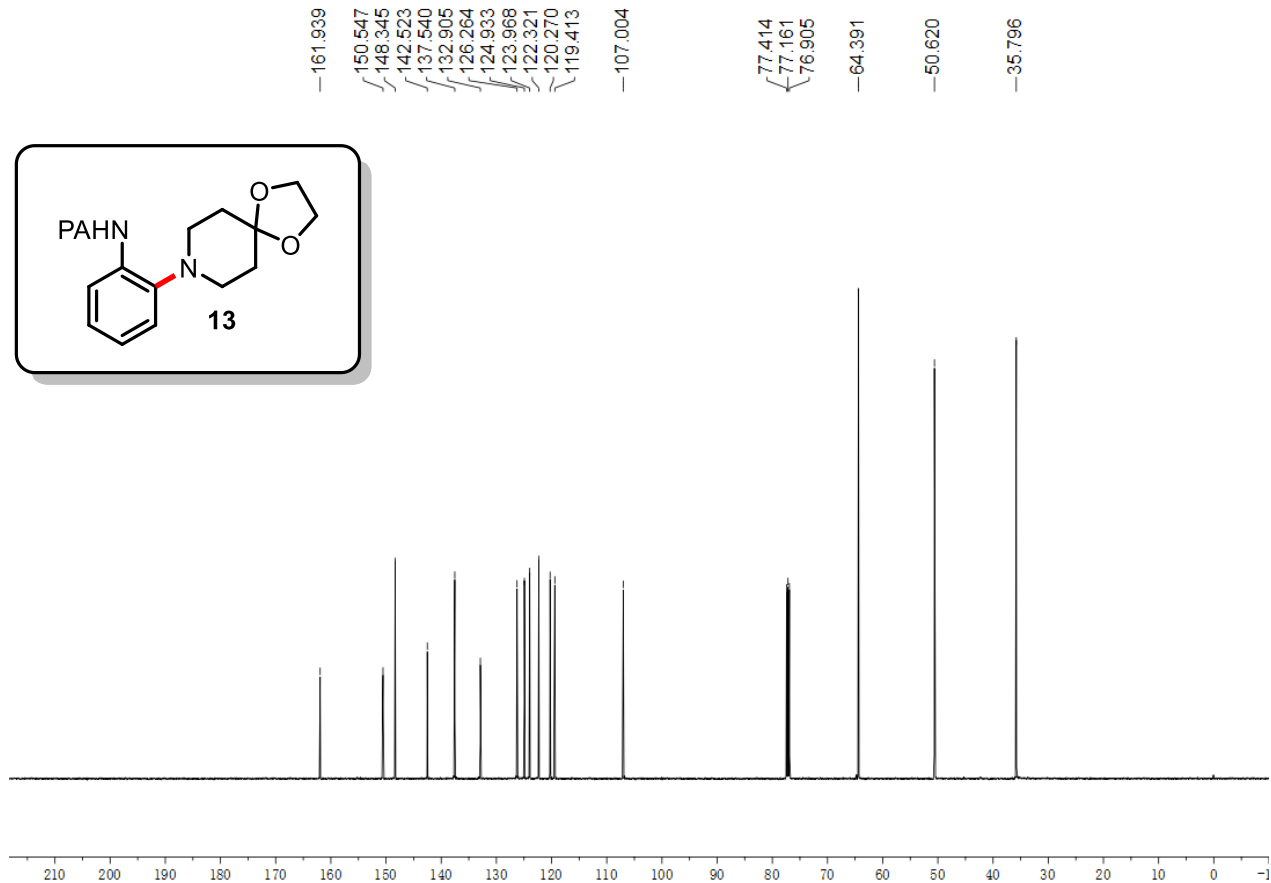



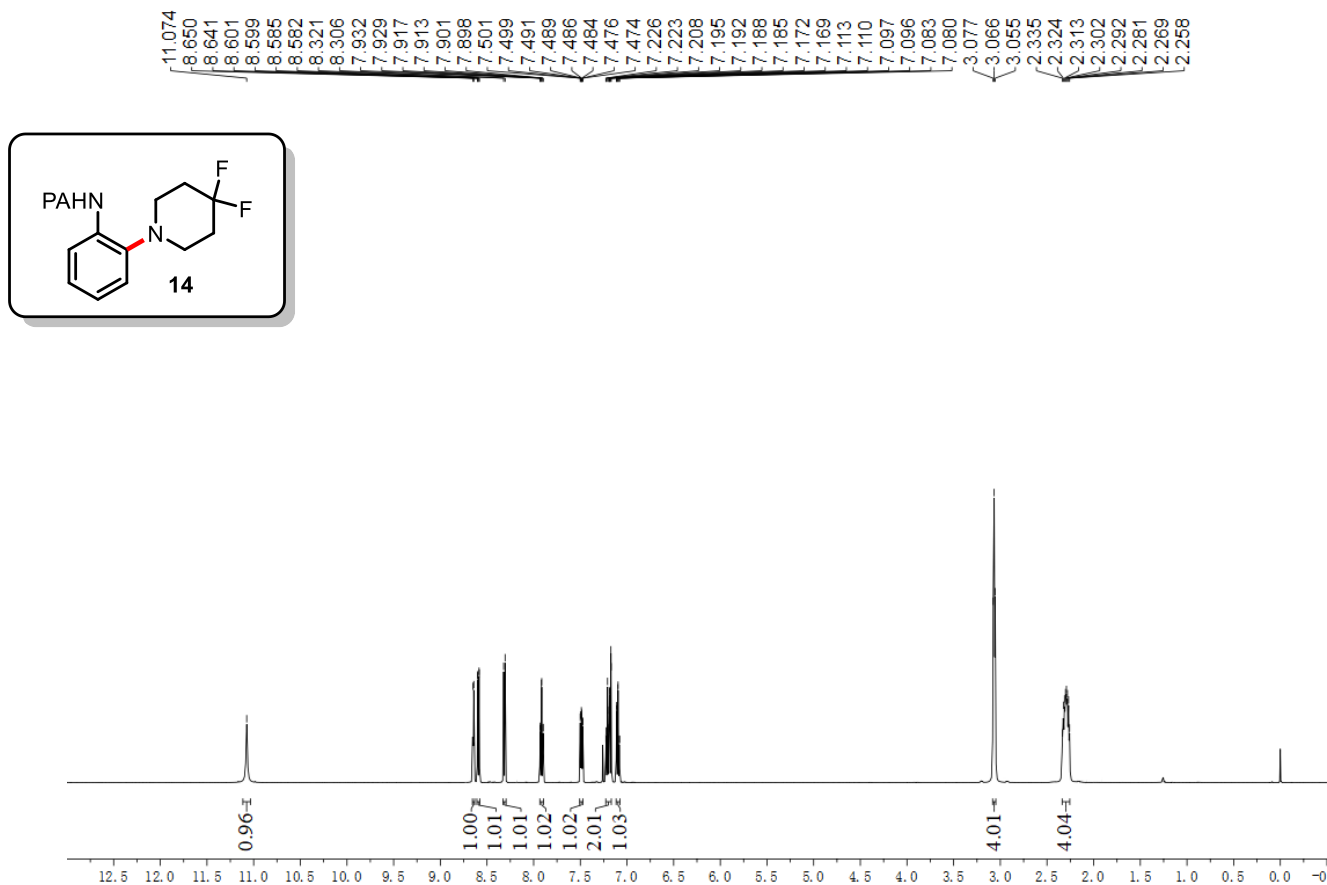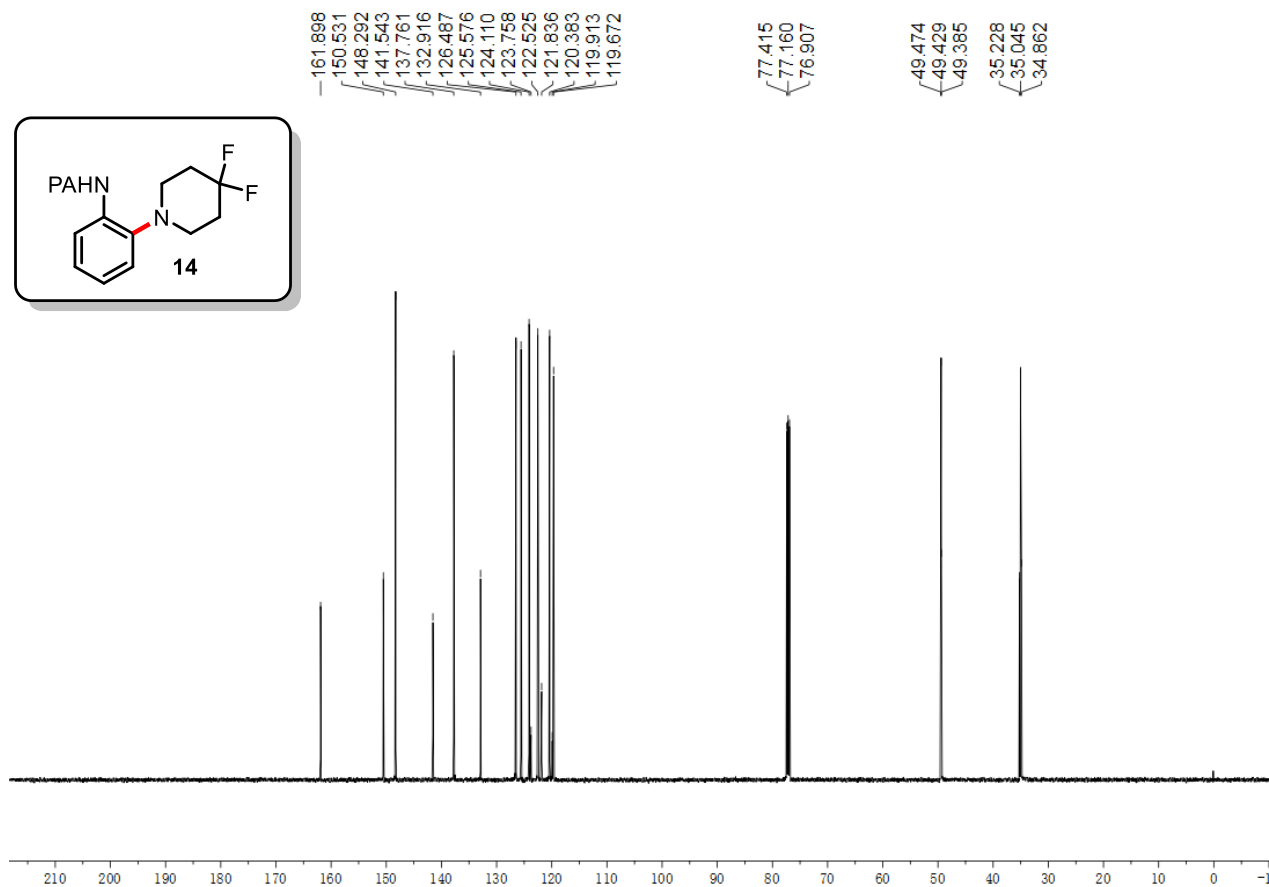

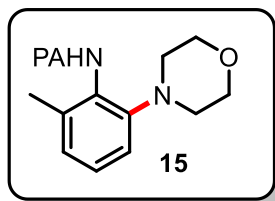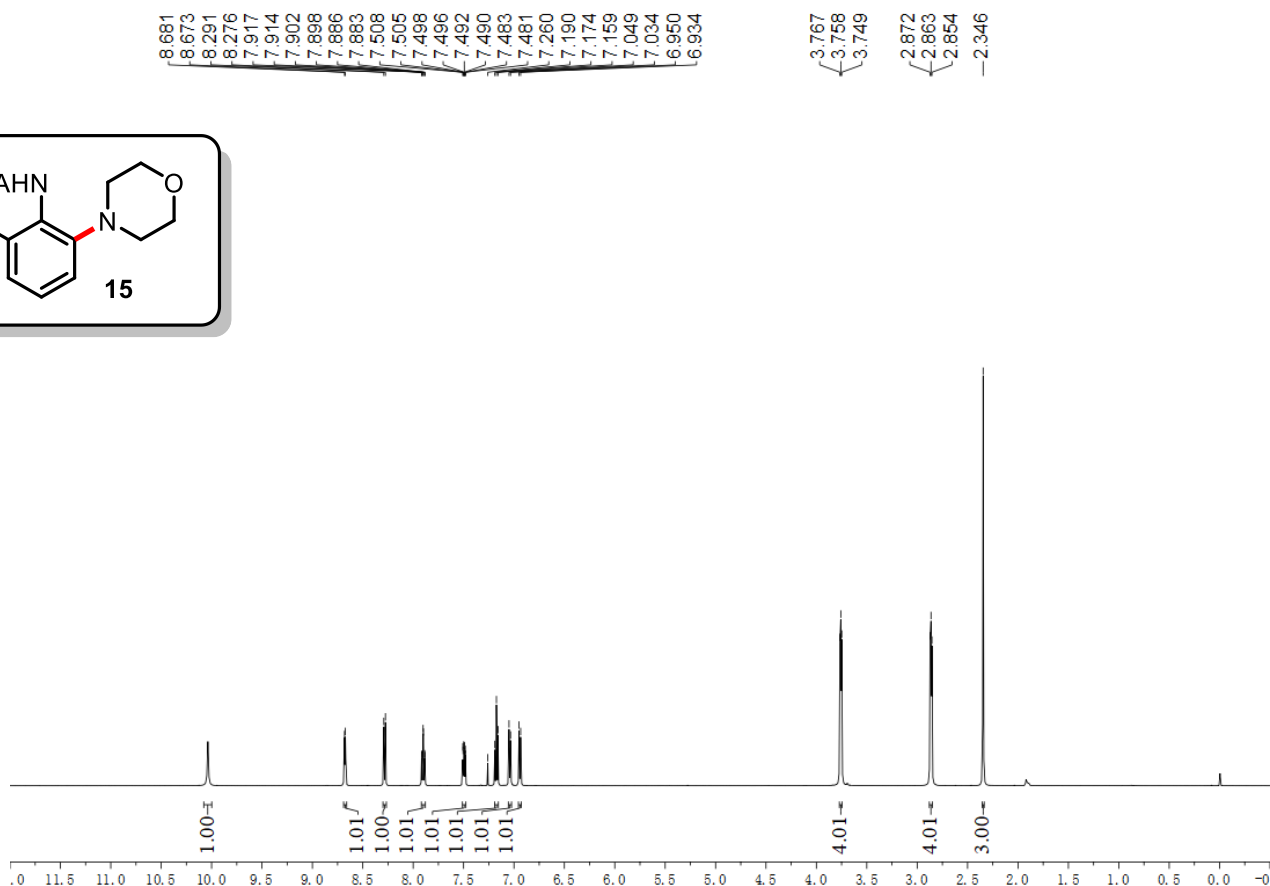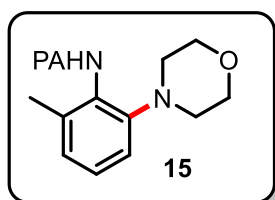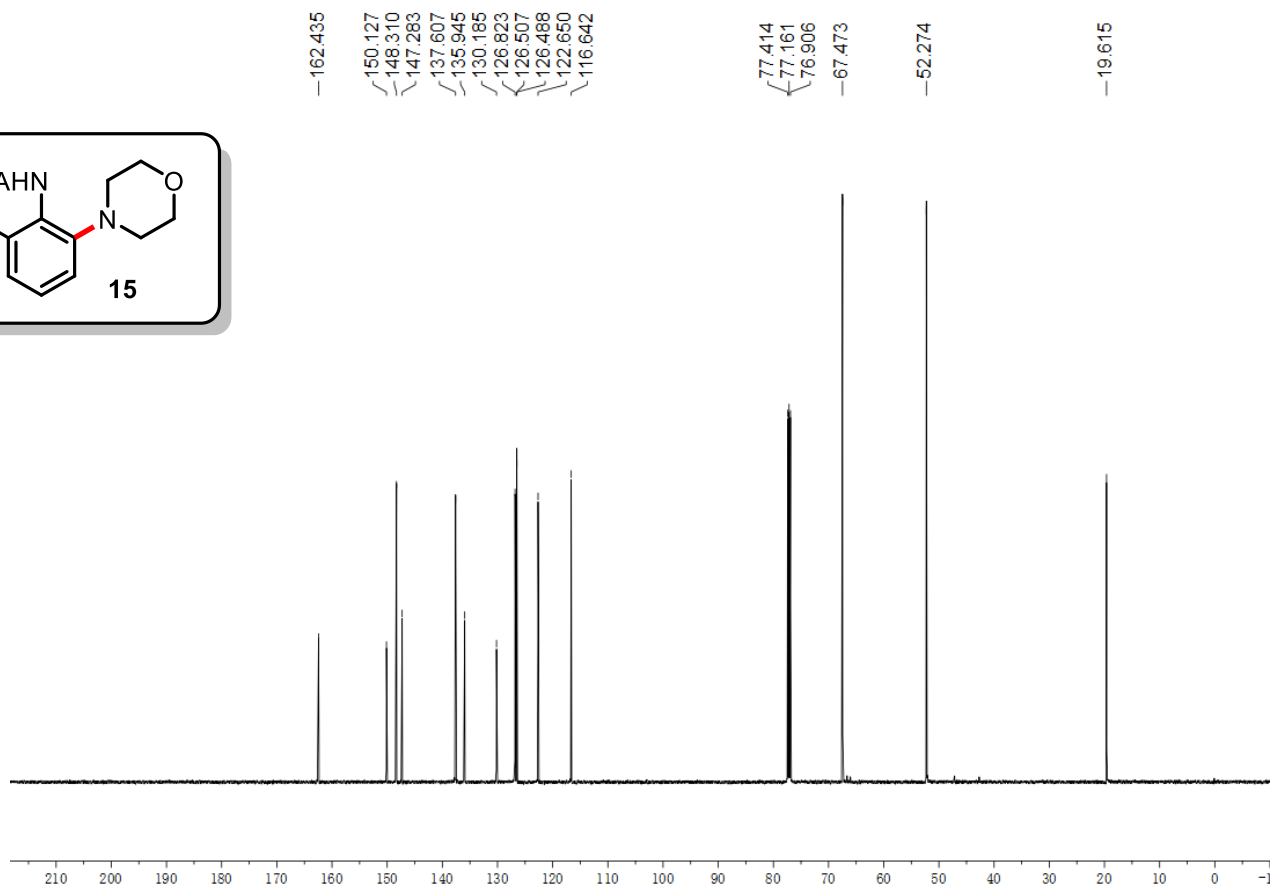

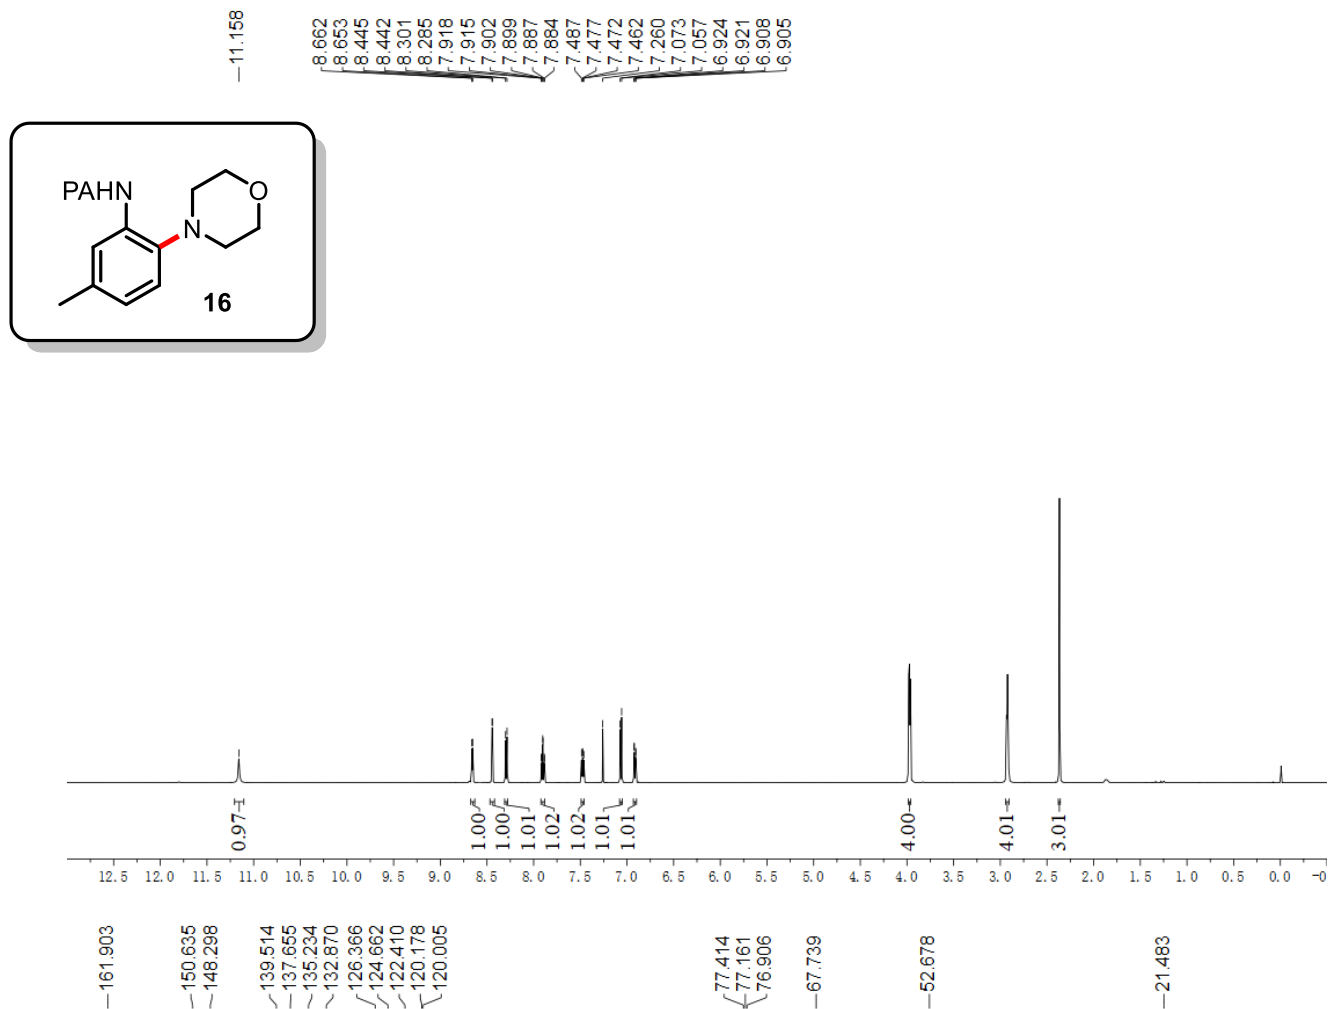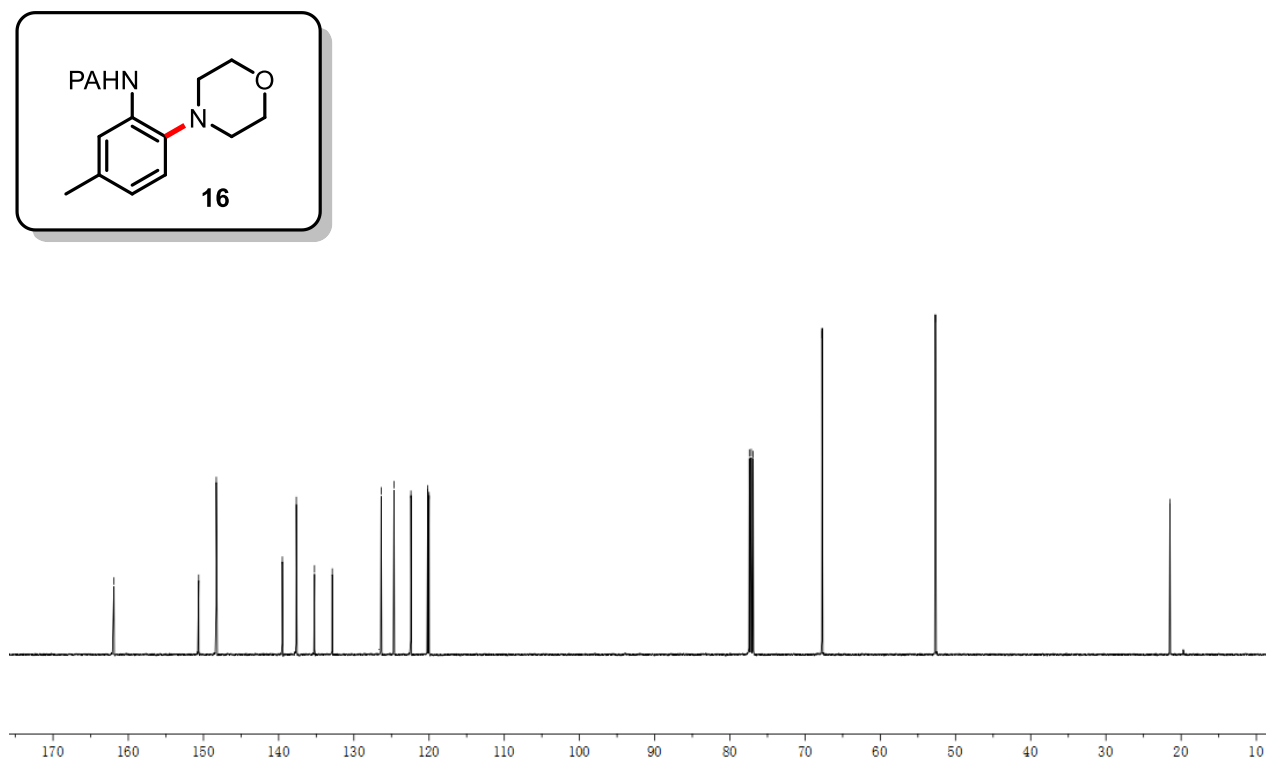

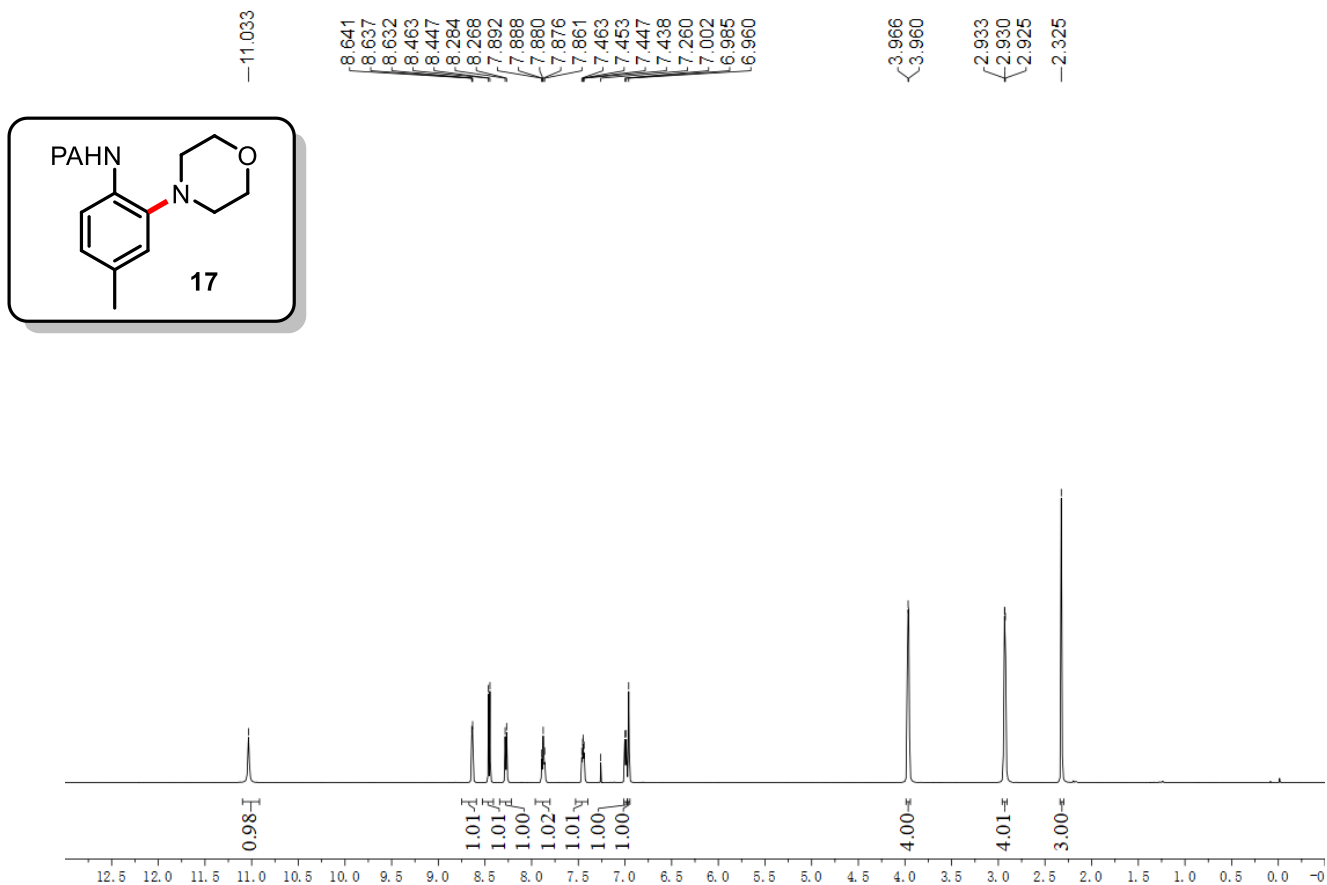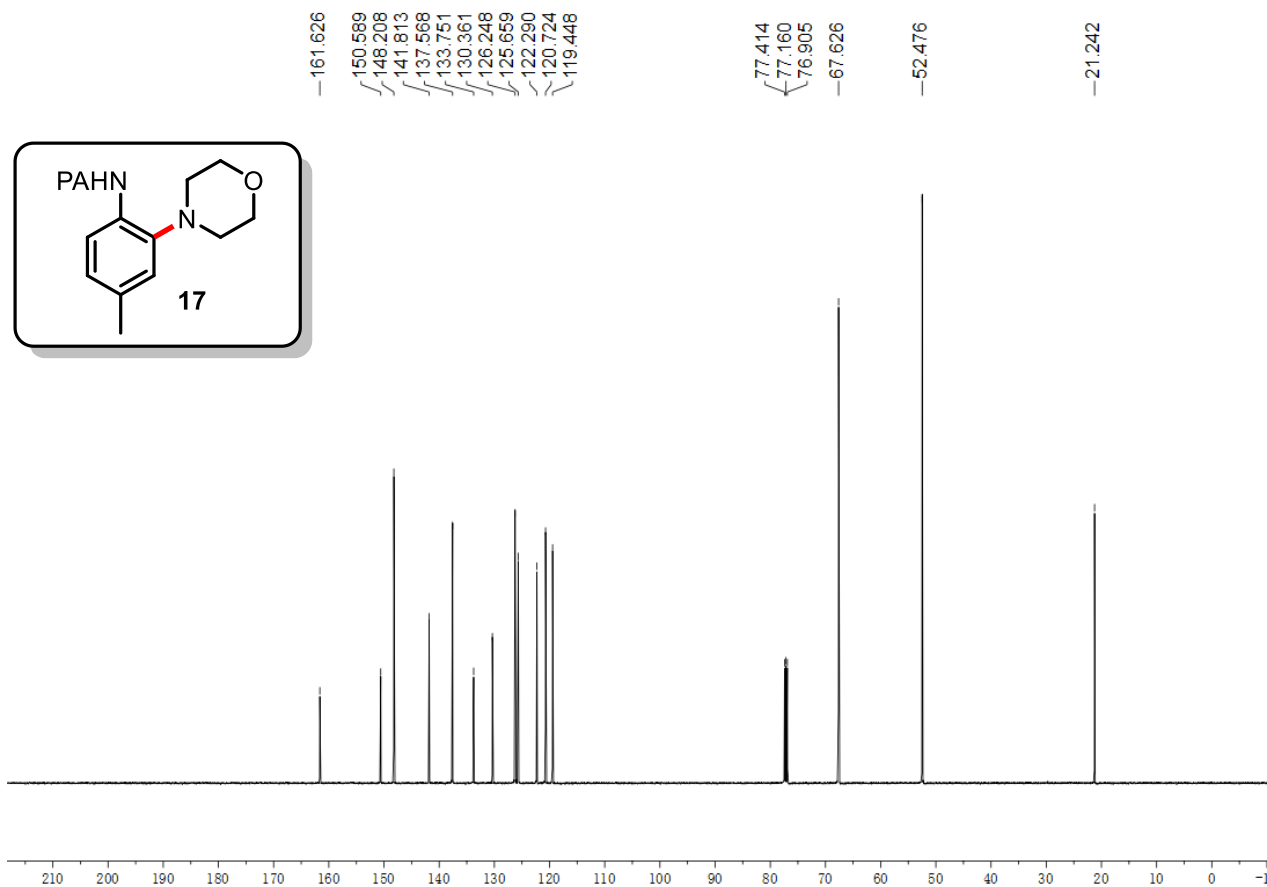

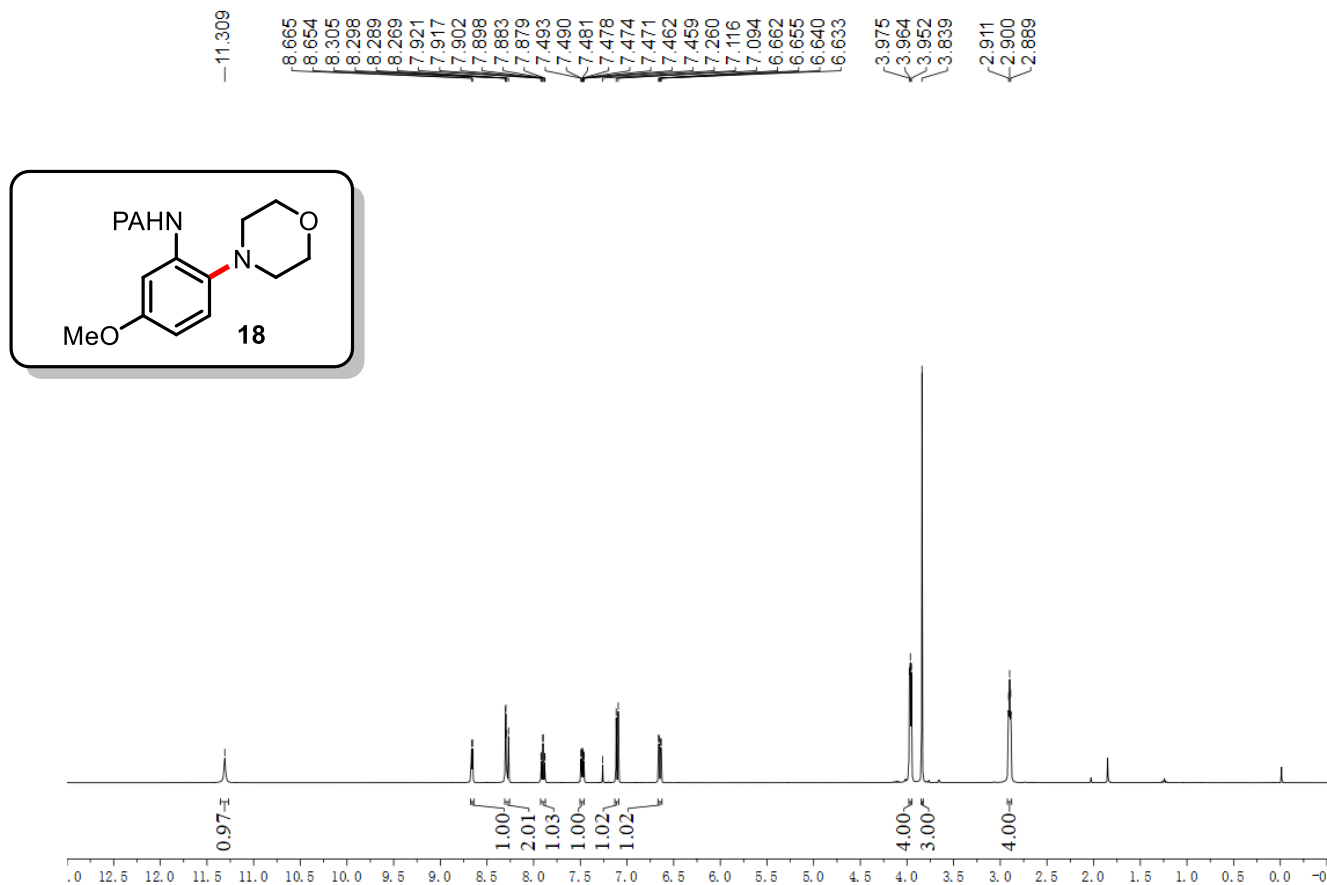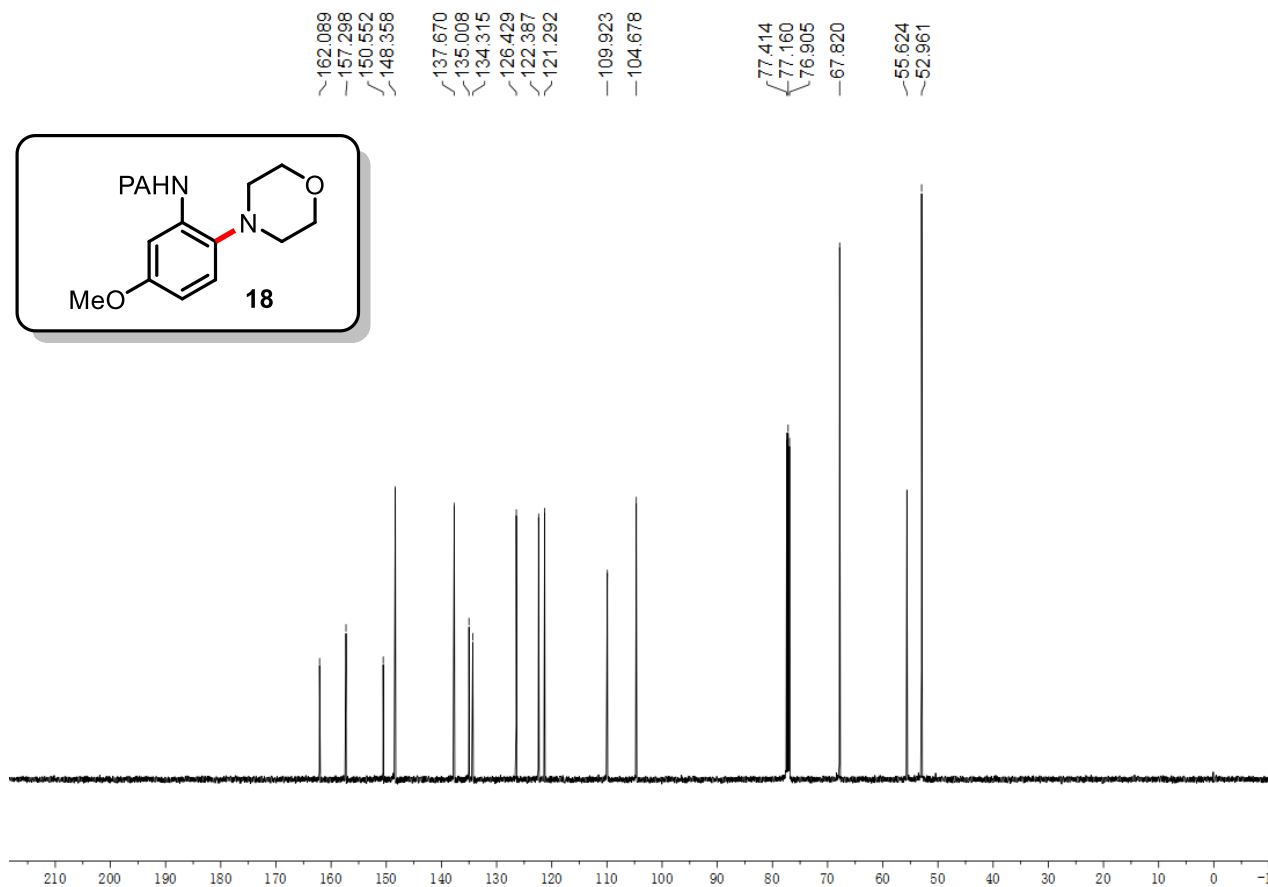

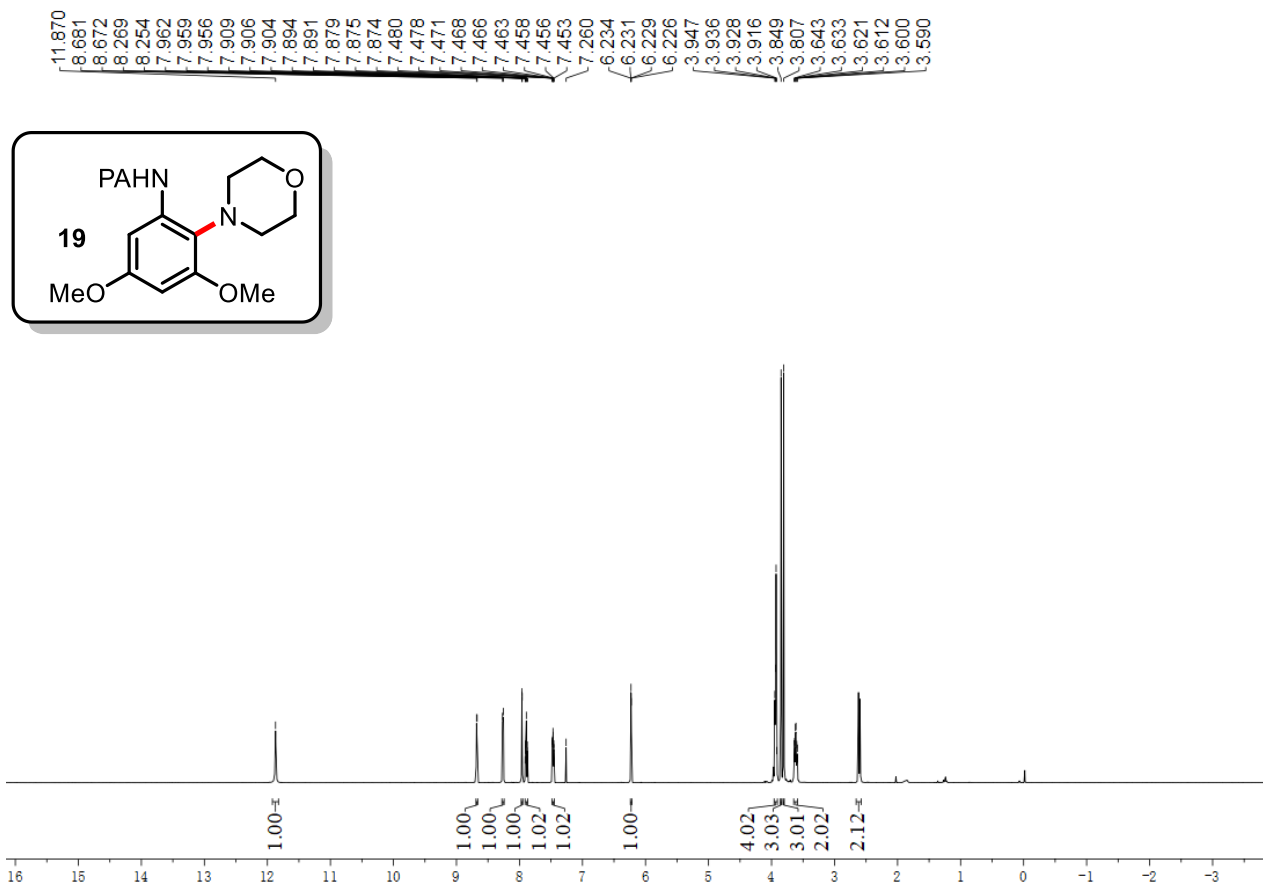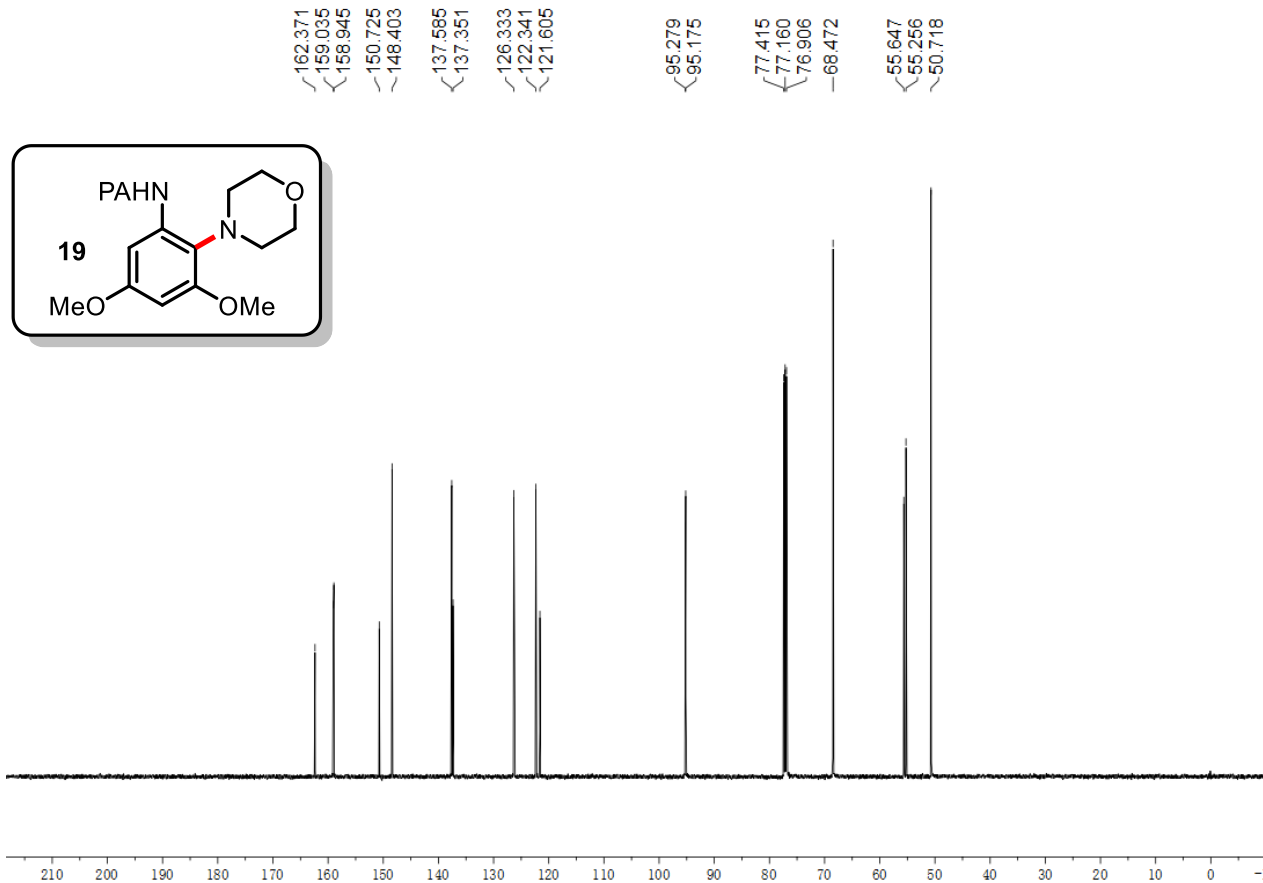

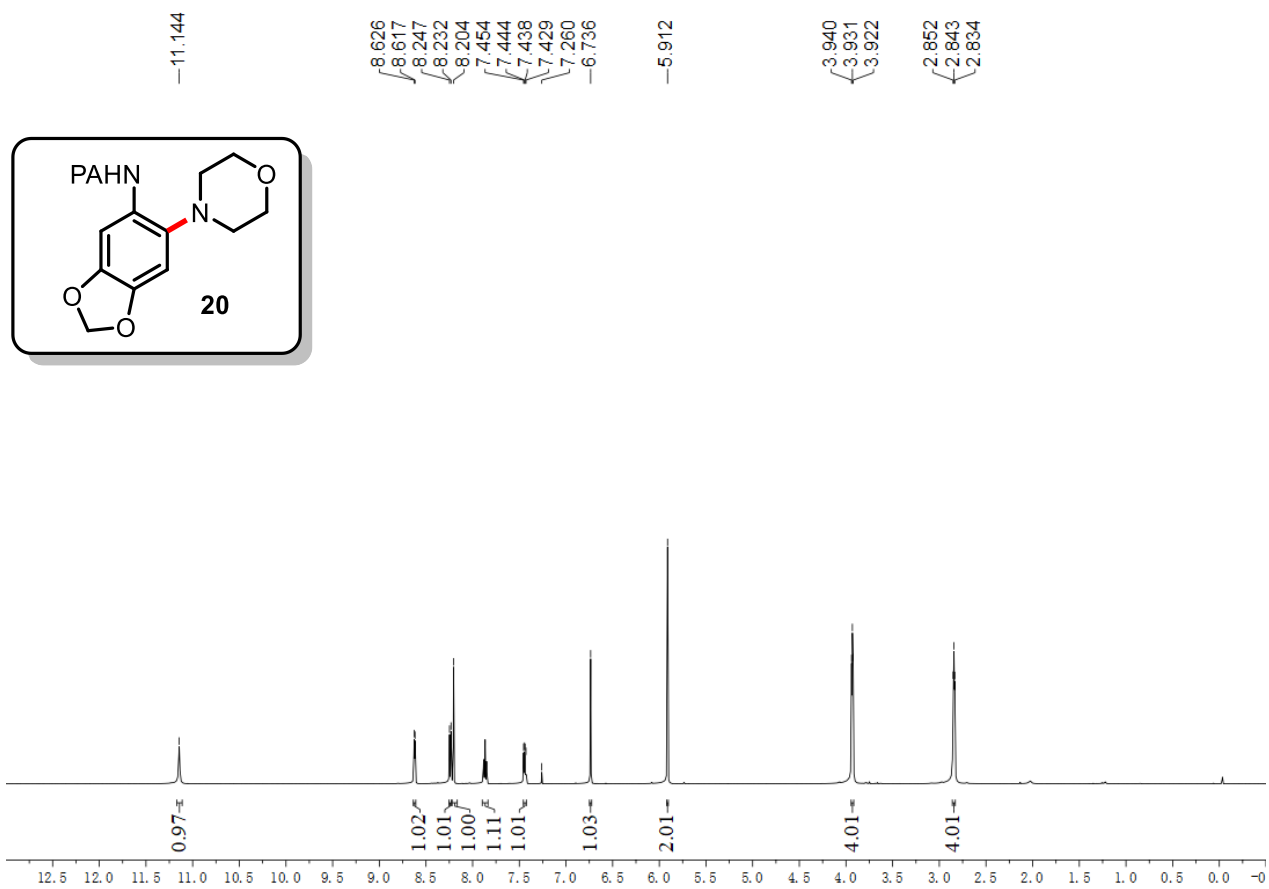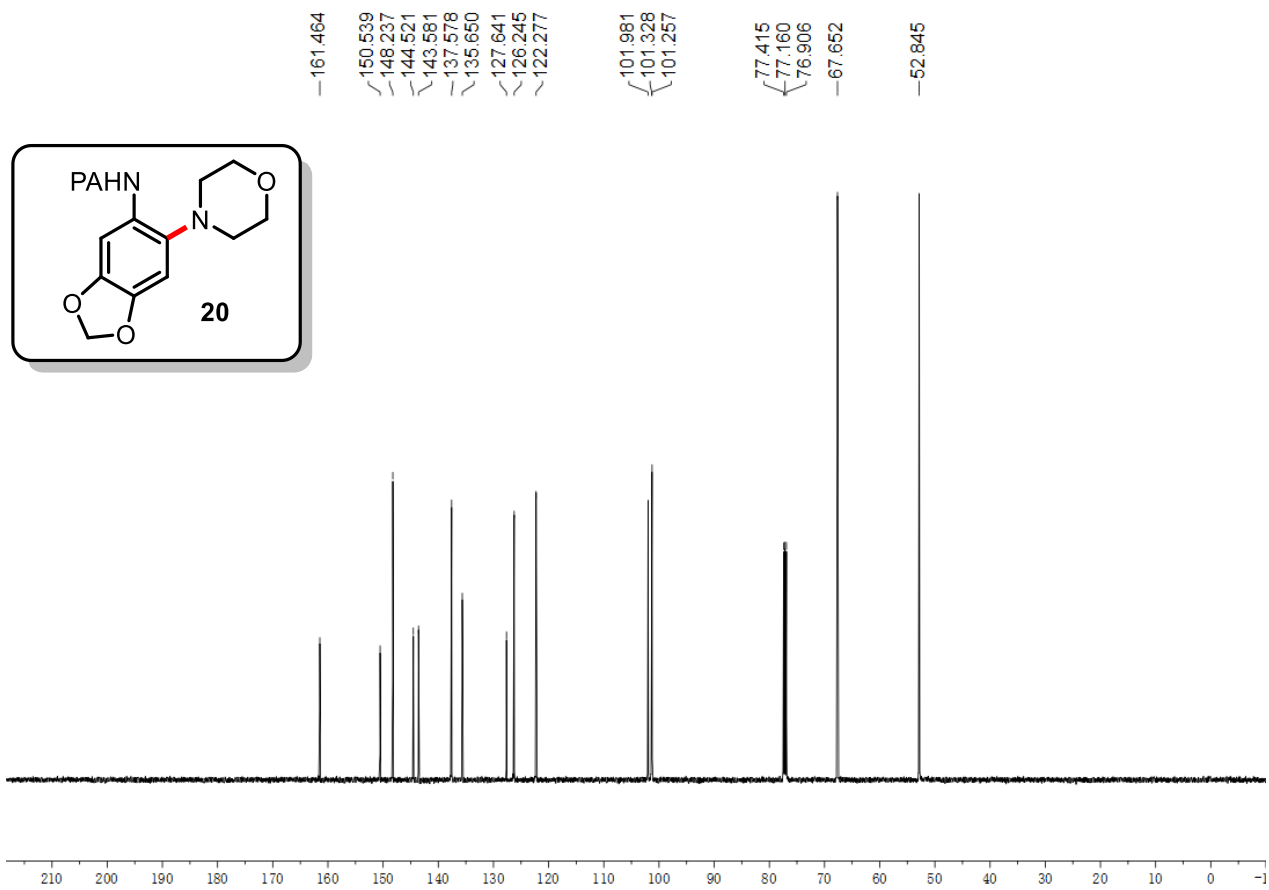

11.214  
8.716  
8.699  
8.678  
8.675  
8.673  
8.668  
8.666  
8.663  
8.303  
8.301  
8.299  
8.288  
8.285  
8.283  
7.940  
7.937  
7.925  
7.922  
7.910  
7.906  
7.524  
7.522  
7.515  
7.513  
7.509  
7.507  
7.500  
7.498  
7.458  
7.441  
7.383  
7.379  
7.260

4.013  
4.004  
3.995  
2.991  
2.982  
2.973

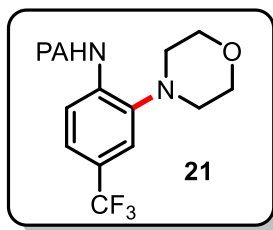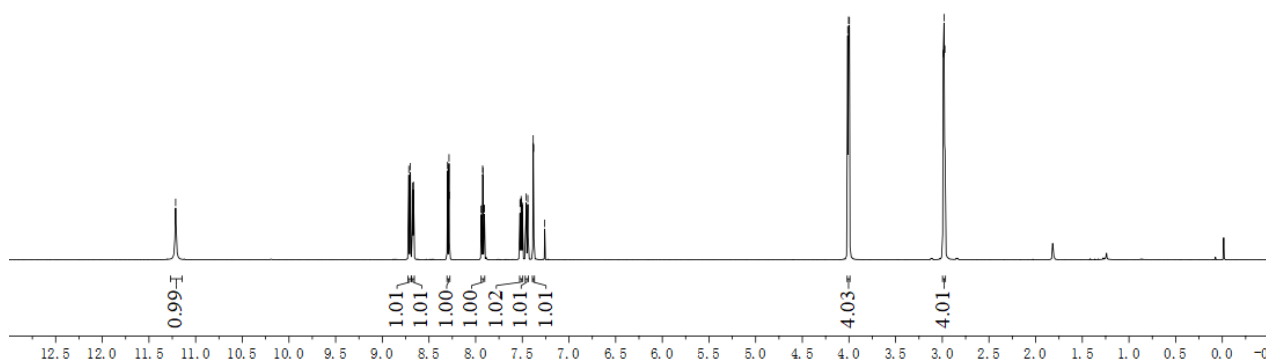

162.317  
150.047  
148.416  
141.974  
137.848  
136.090  
127.474  
126.815  
126.227  
125.968  
125.710  
125.451  
125.313  
123.152  
122.856  
122.599  
122.569  
122.537  
122.505  
120.991  
119.413  
117.300  
117.271  
117.242  
117.212  
77.415  
77.160  
76.907  
67.526  
52.378

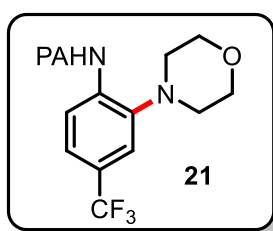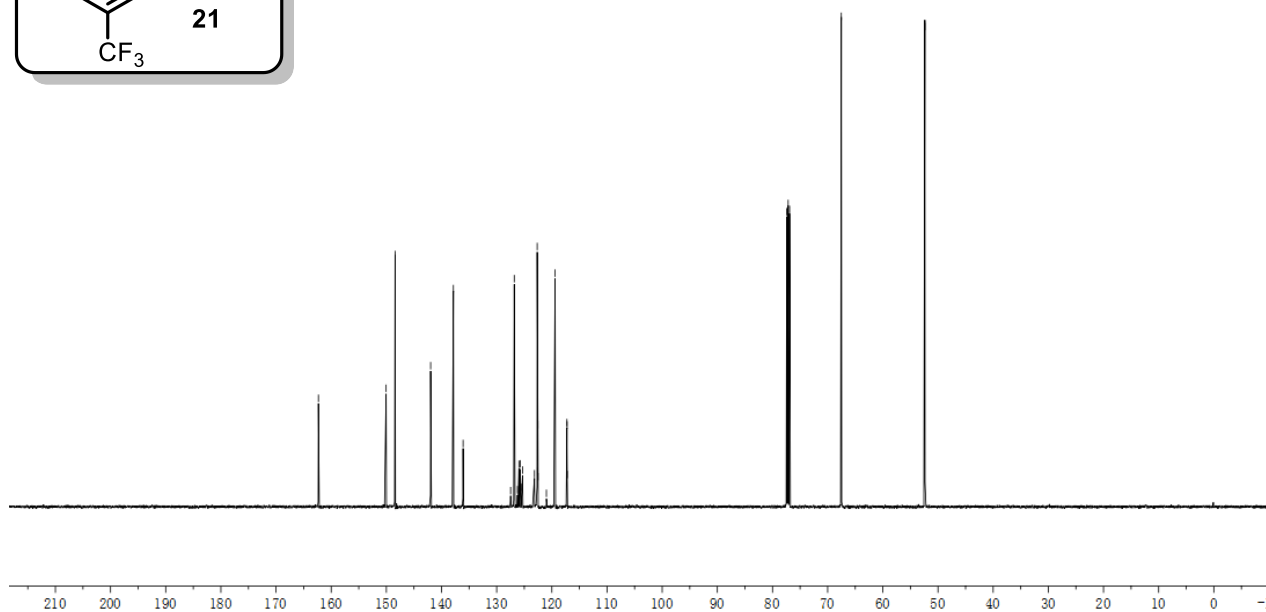



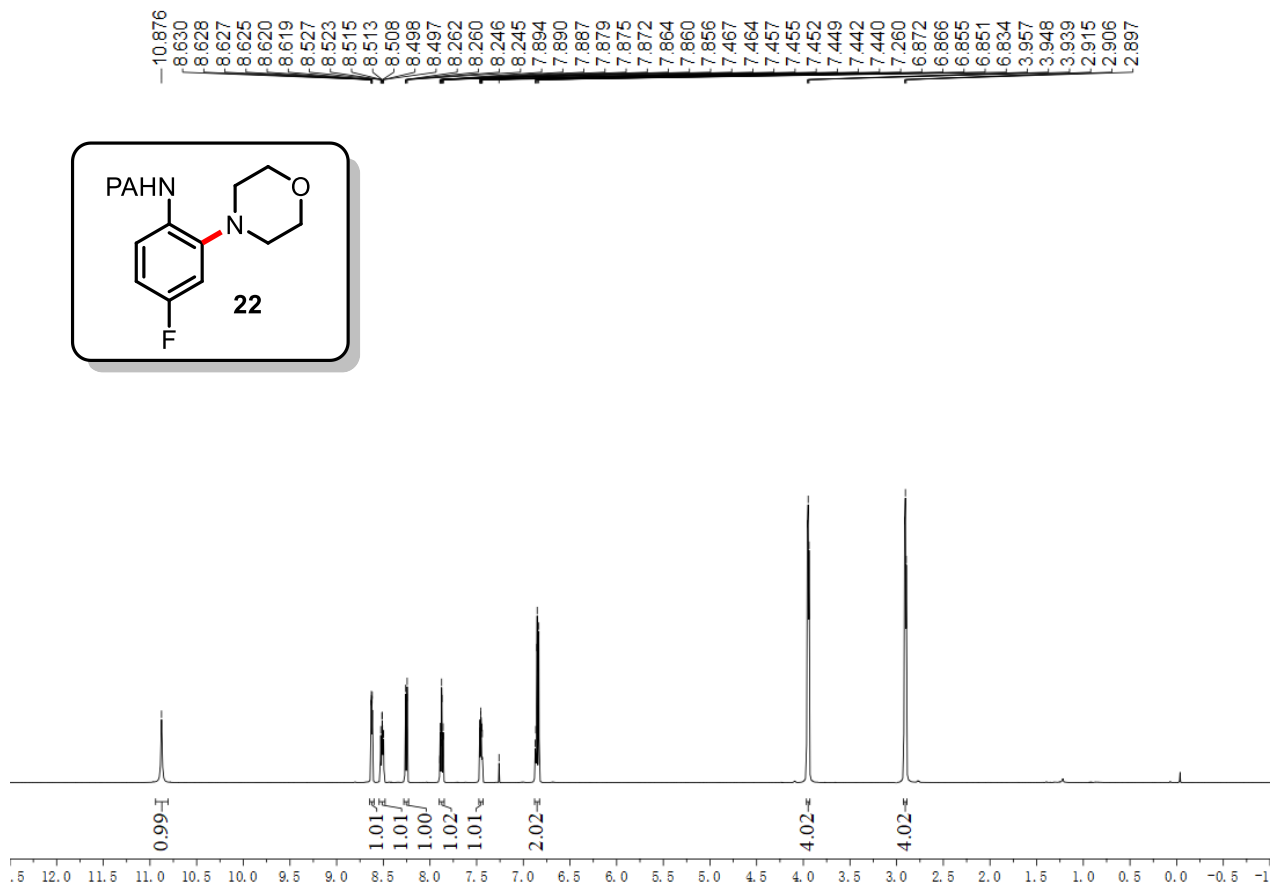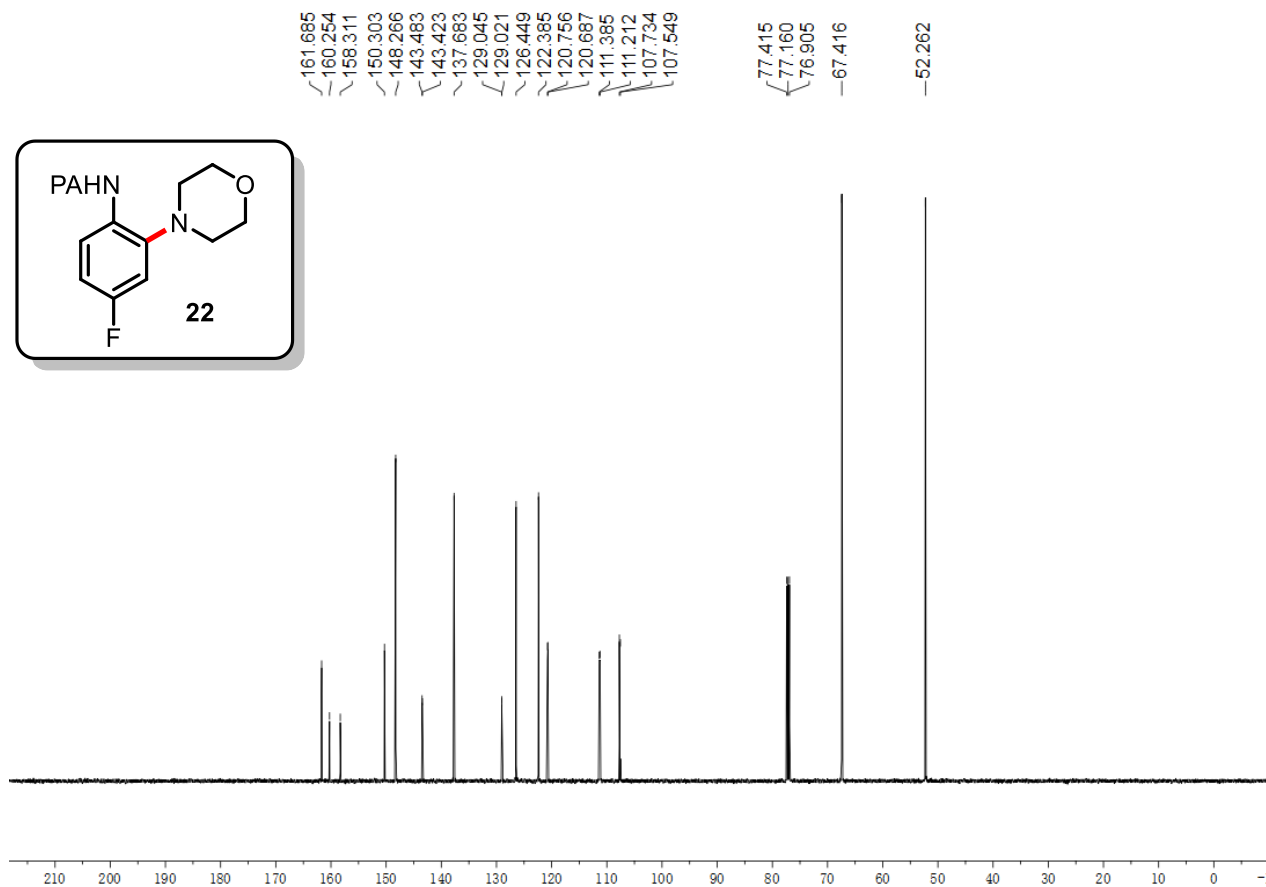

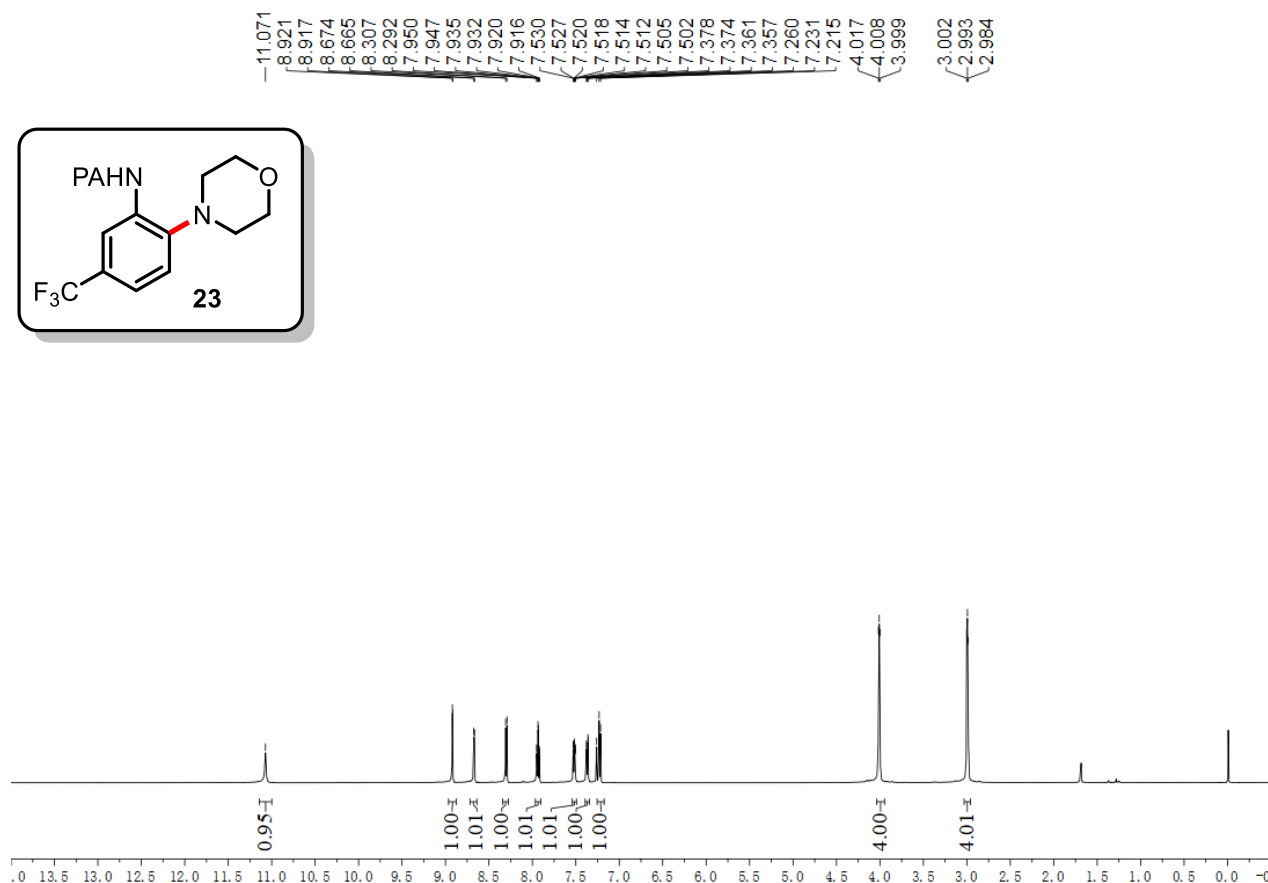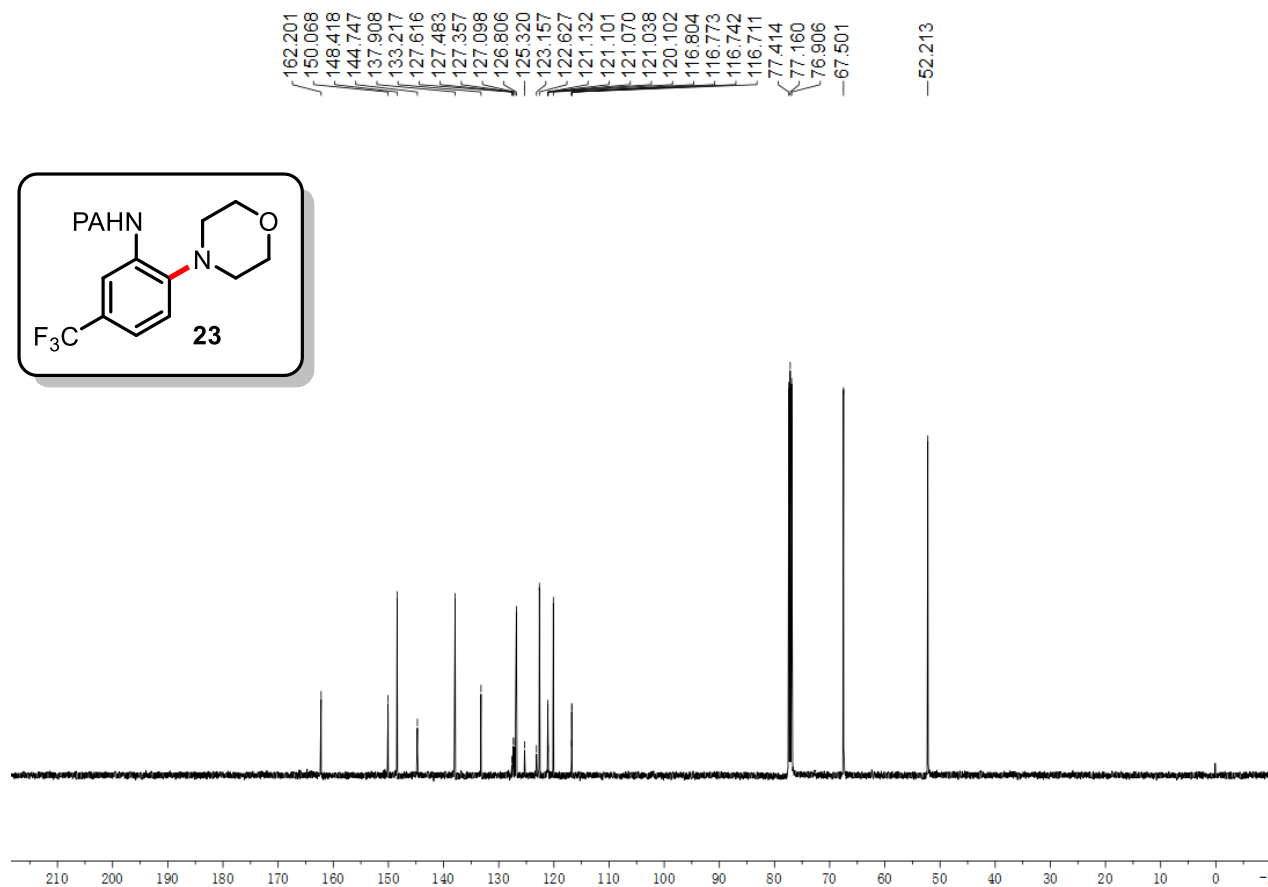

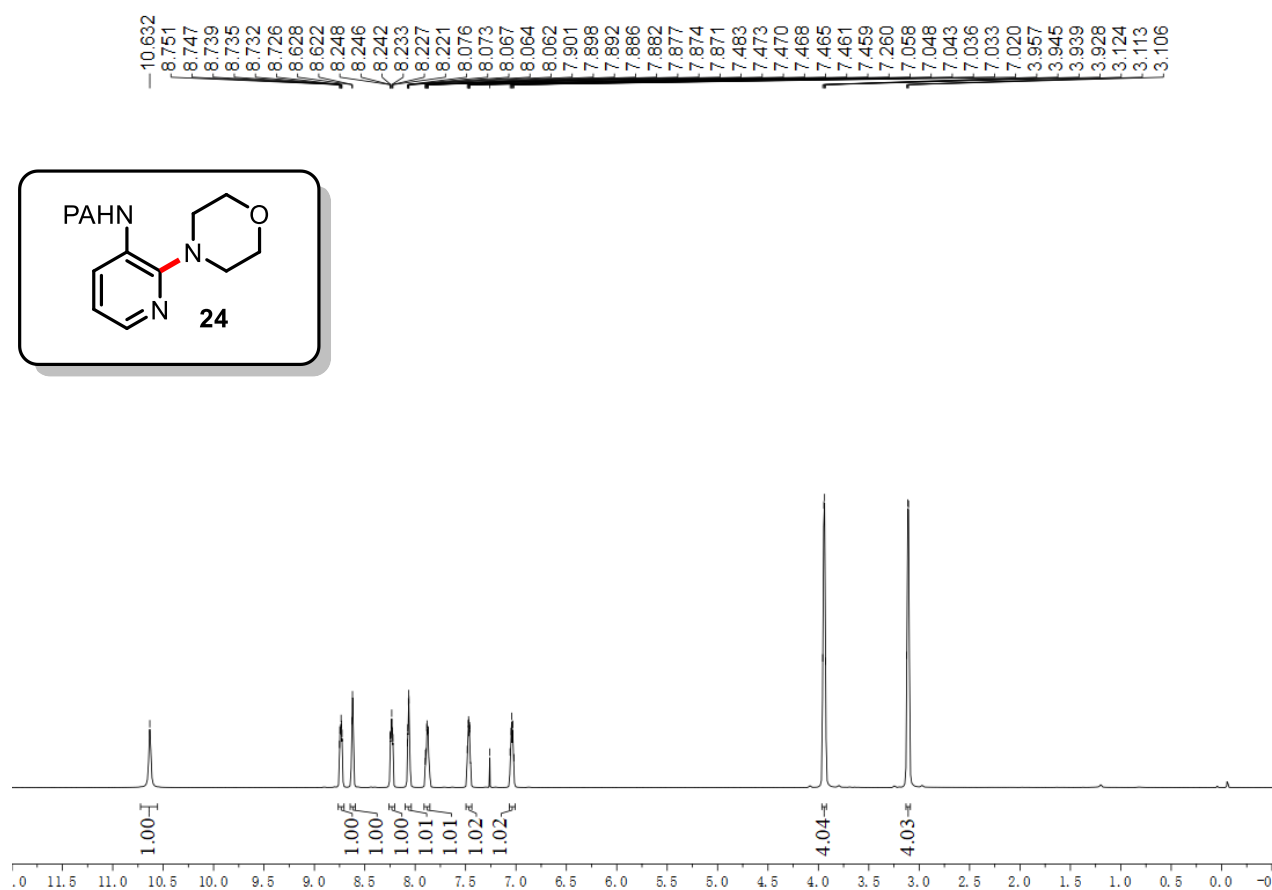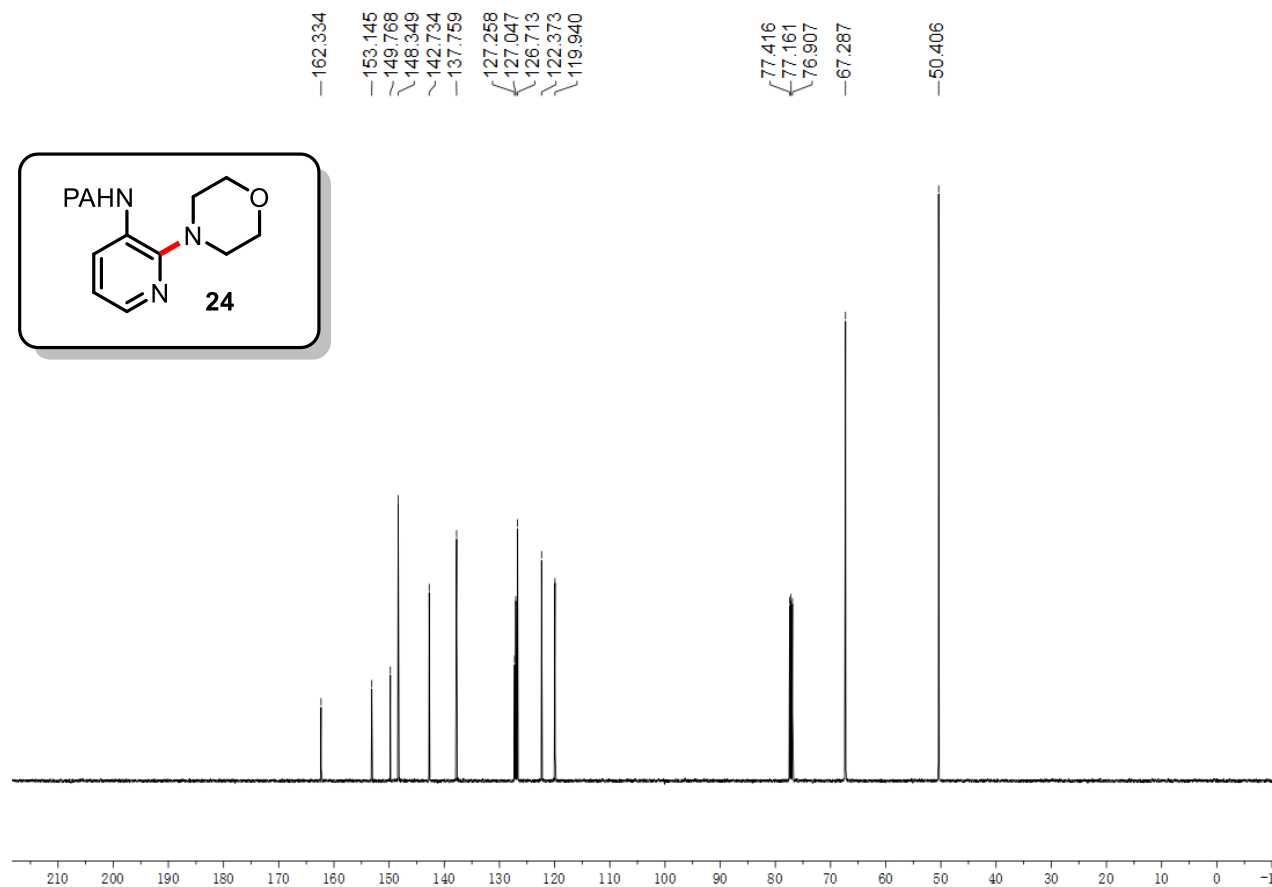

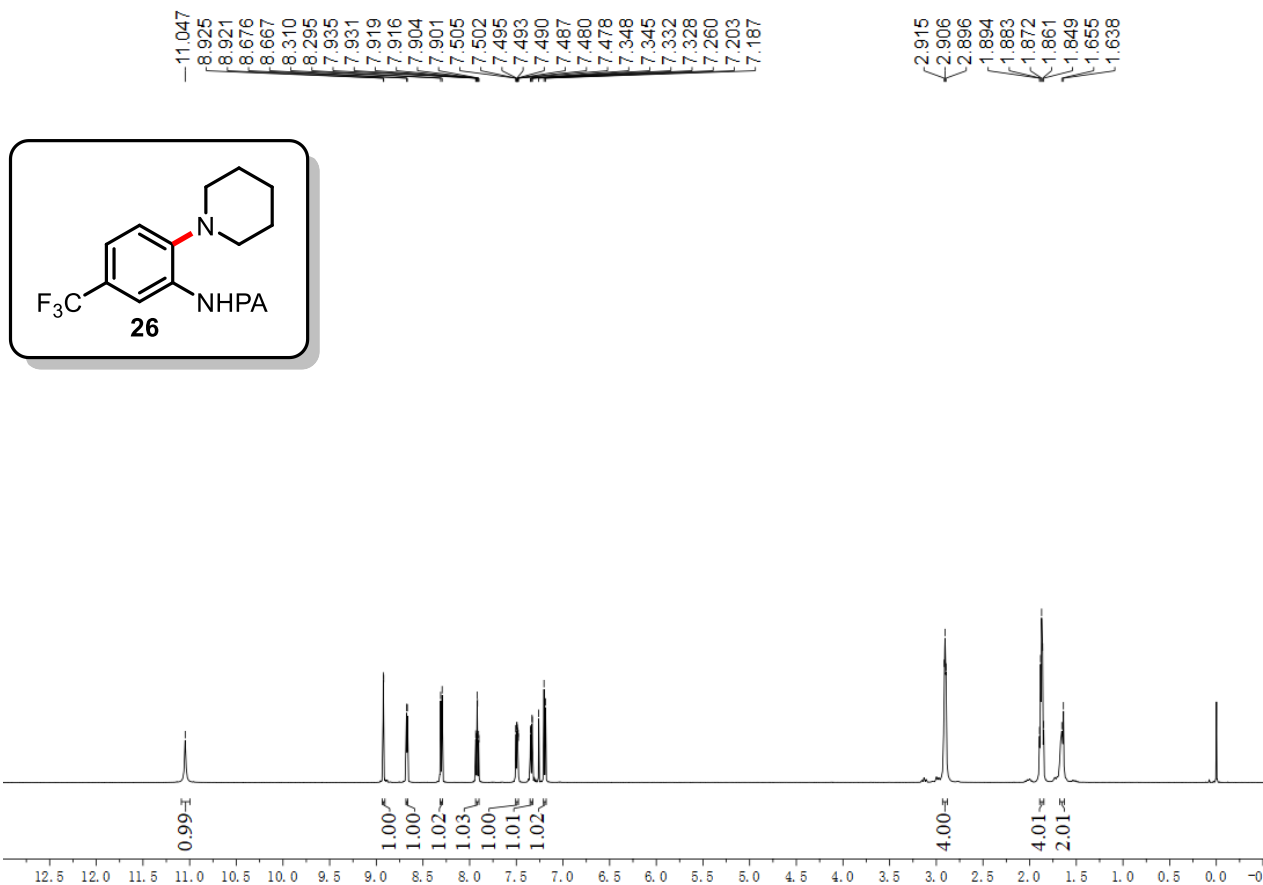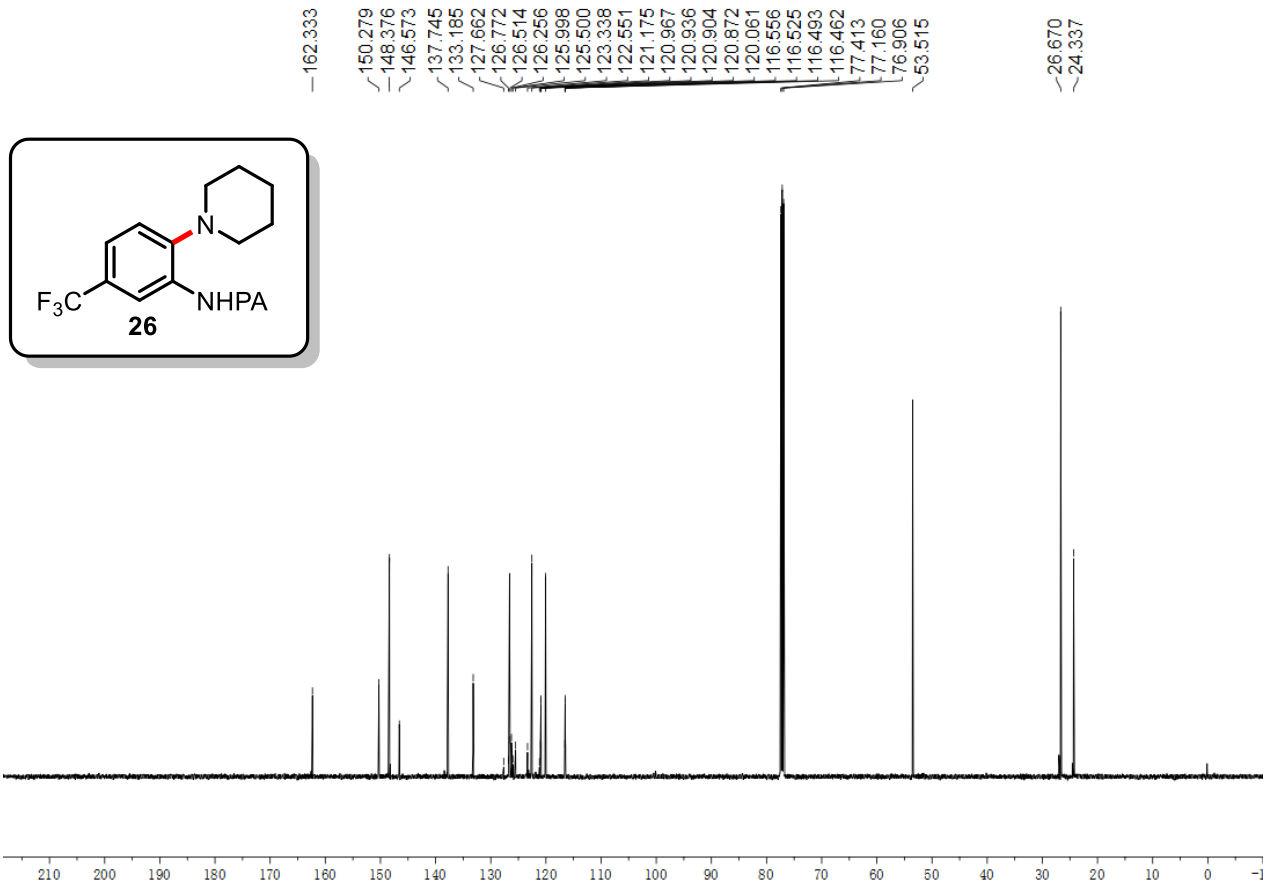

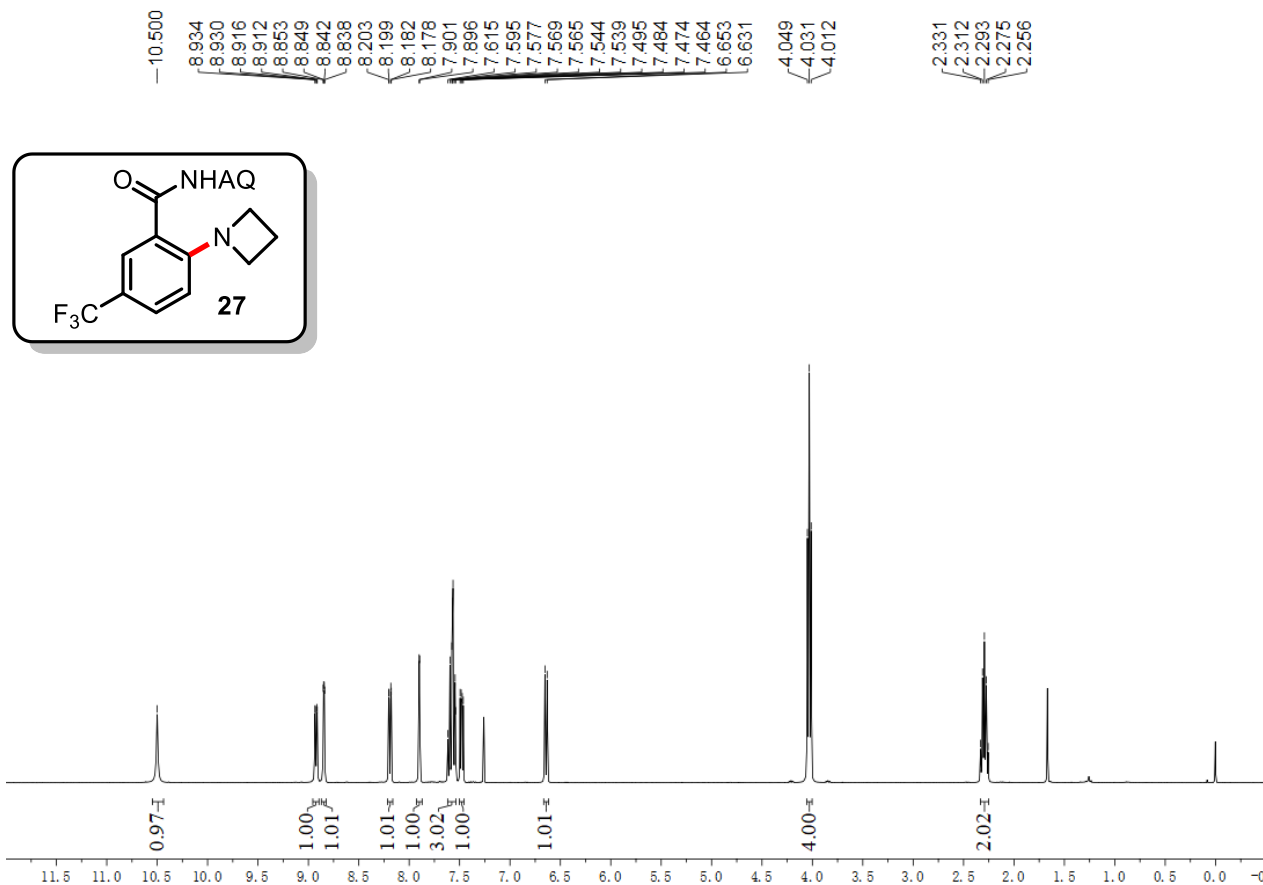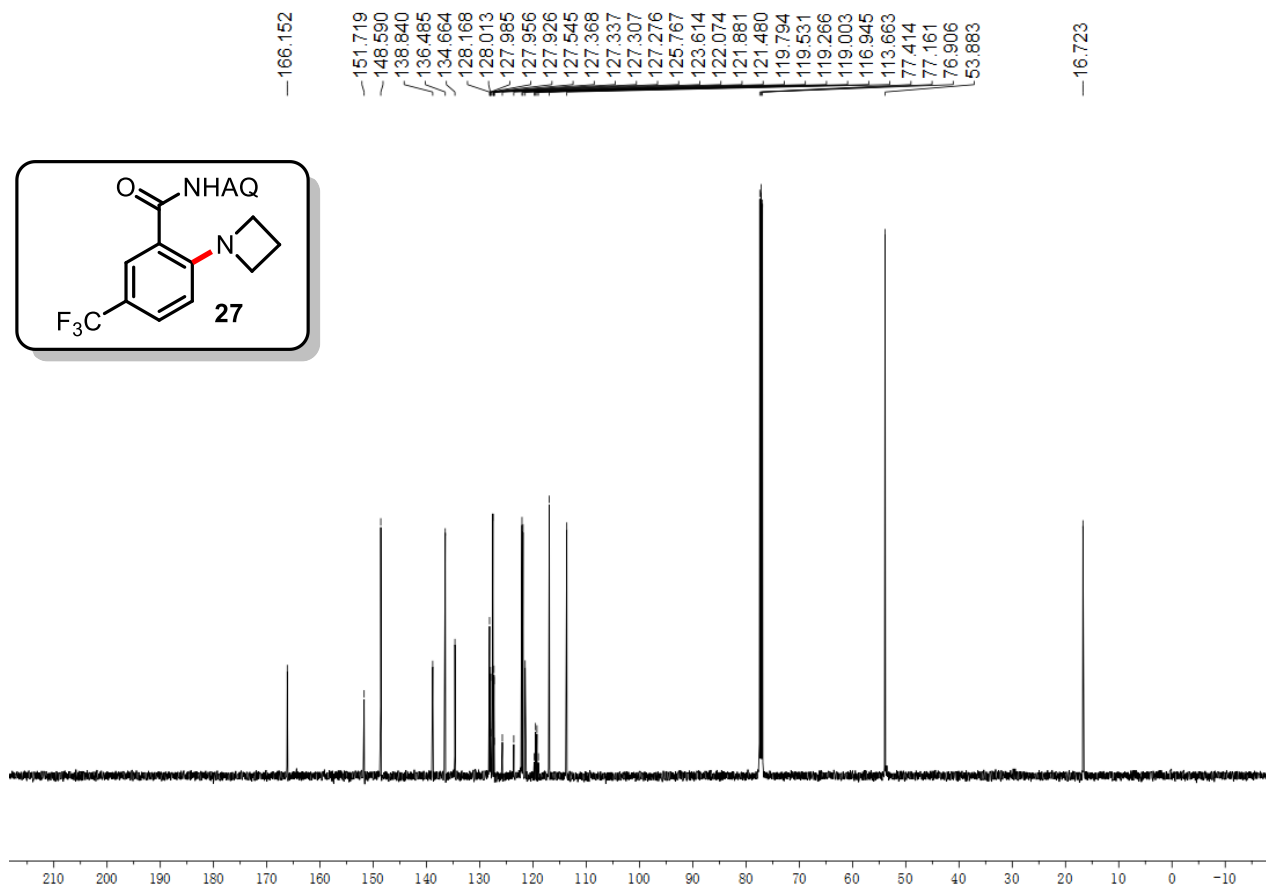

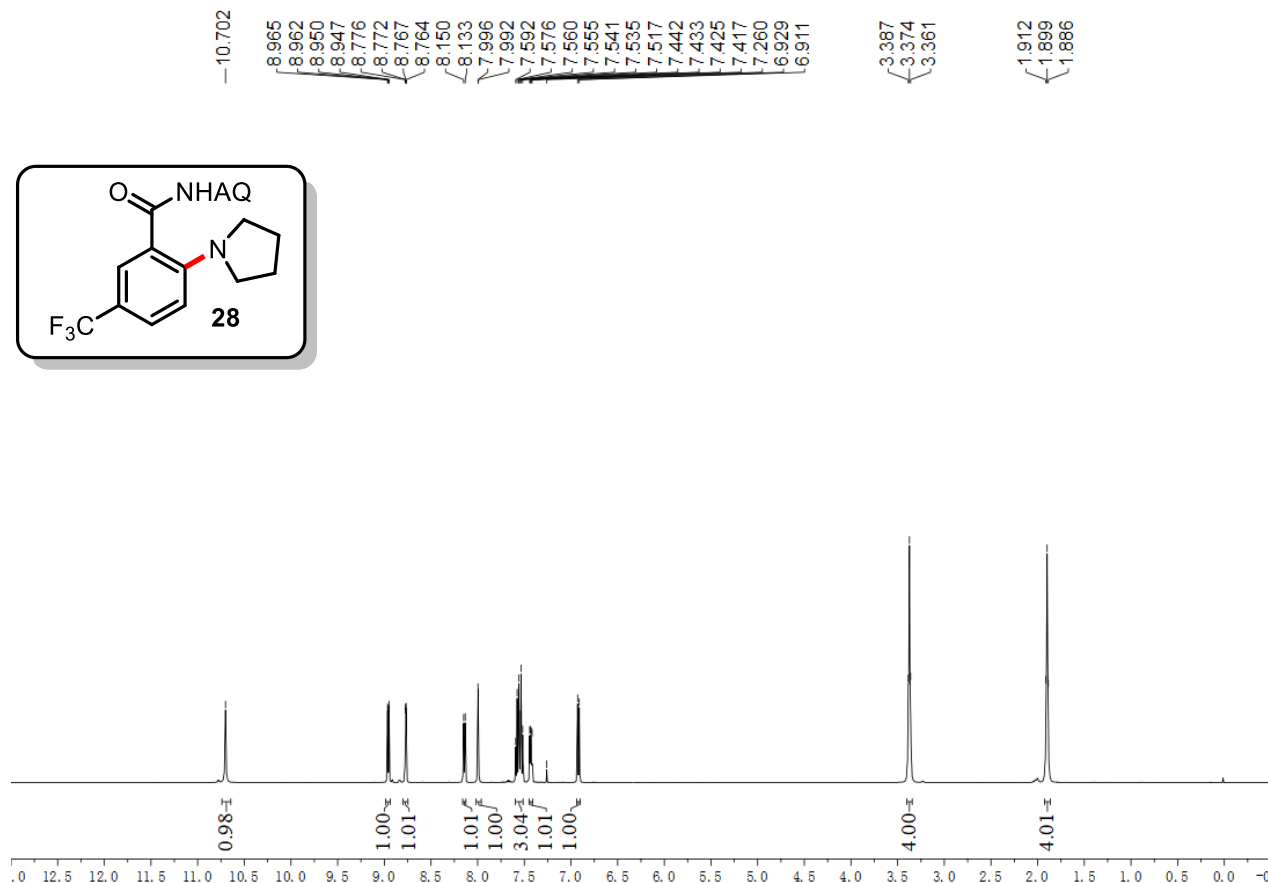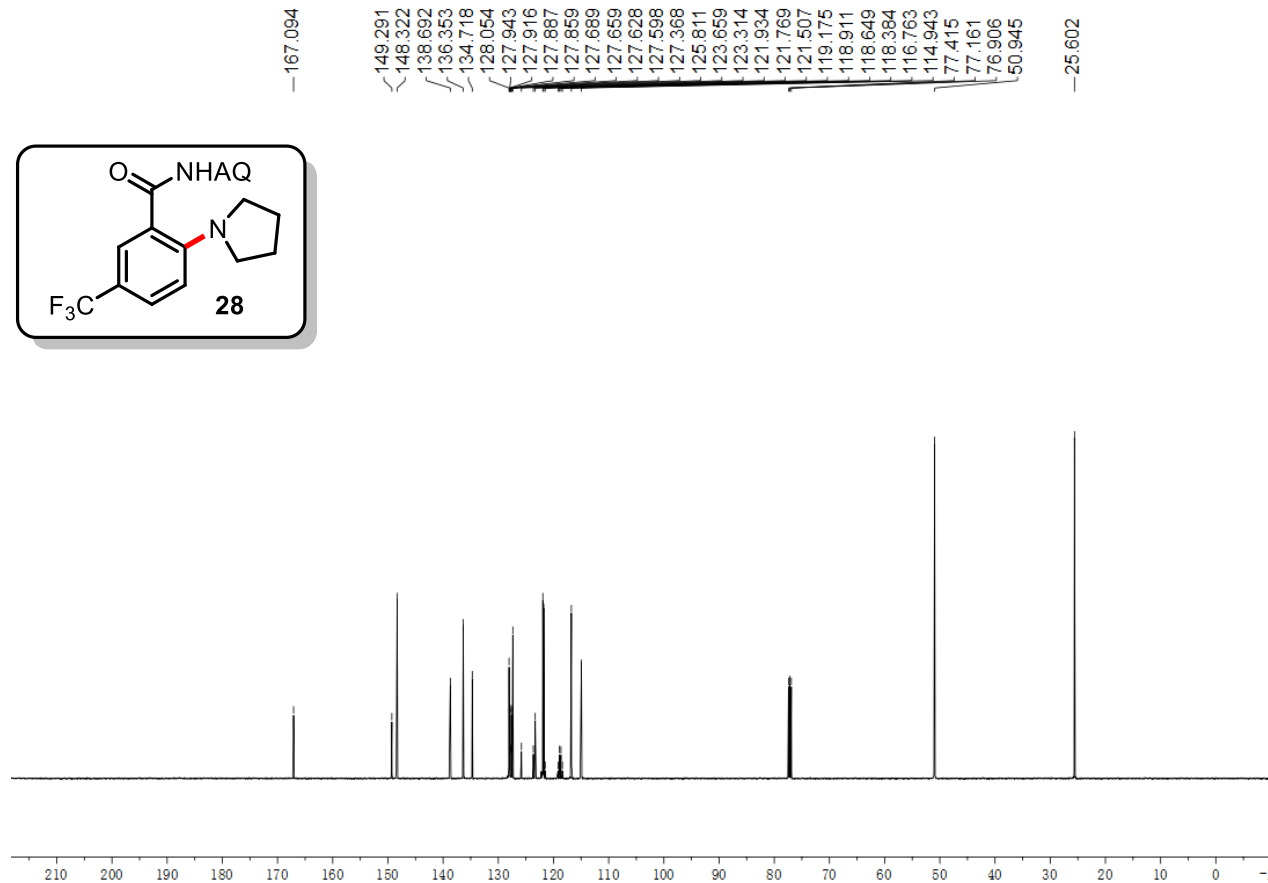

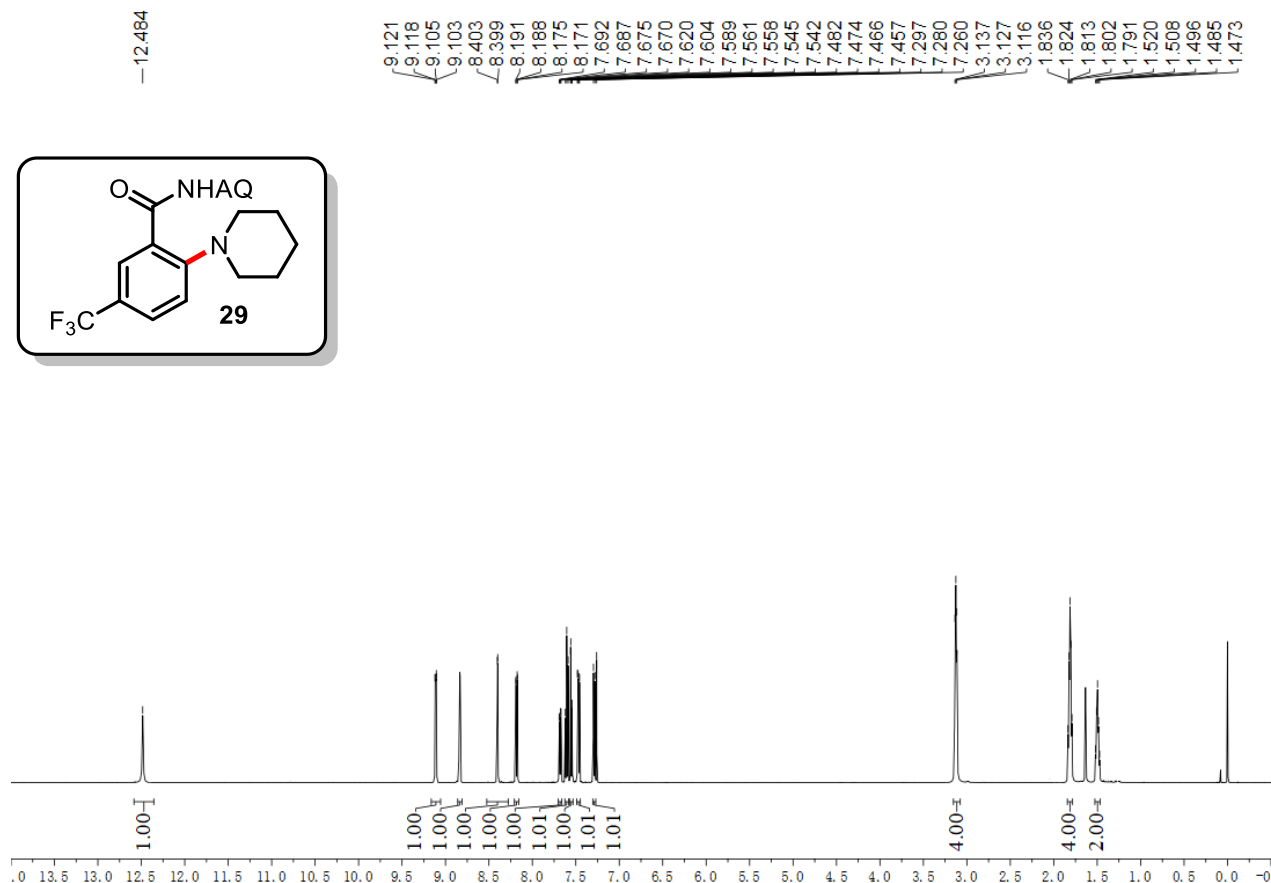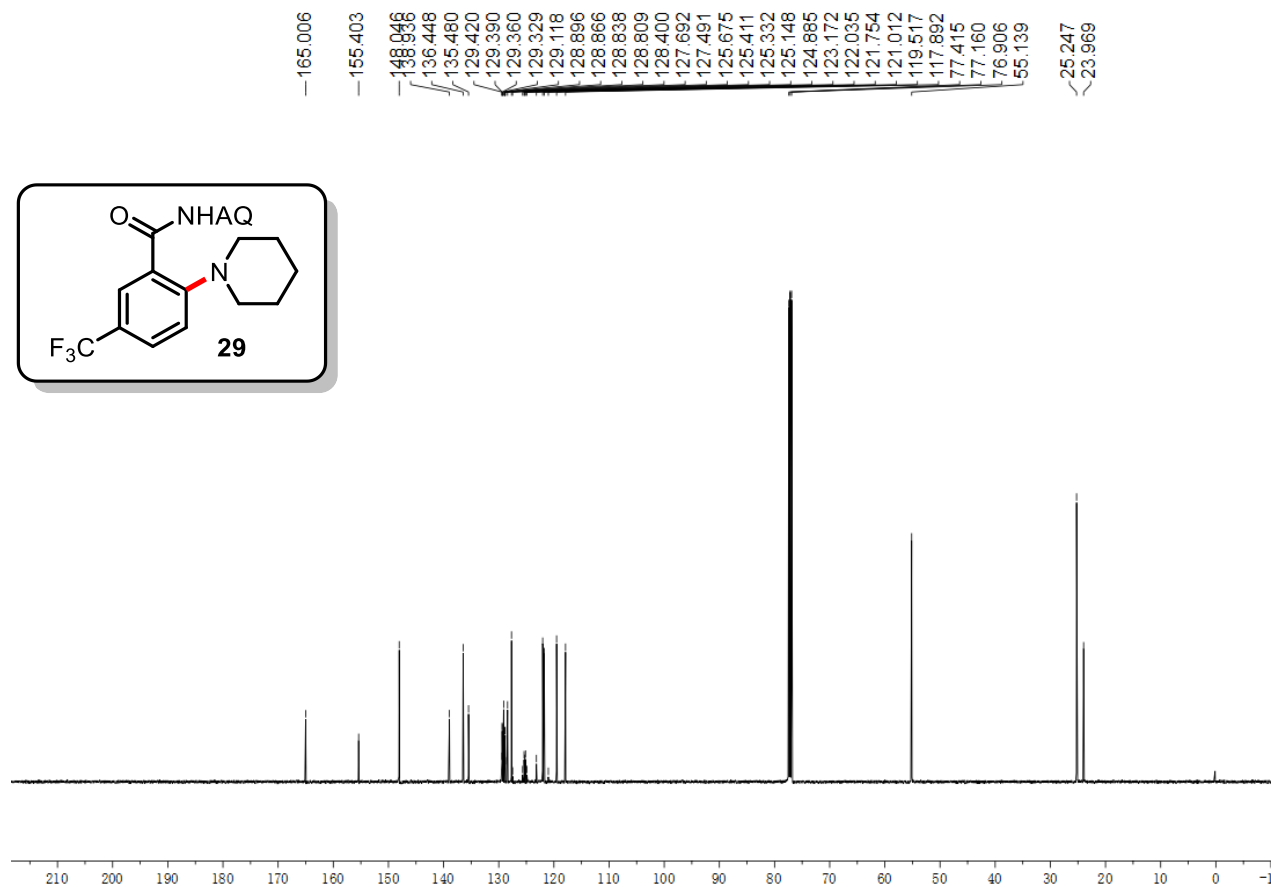

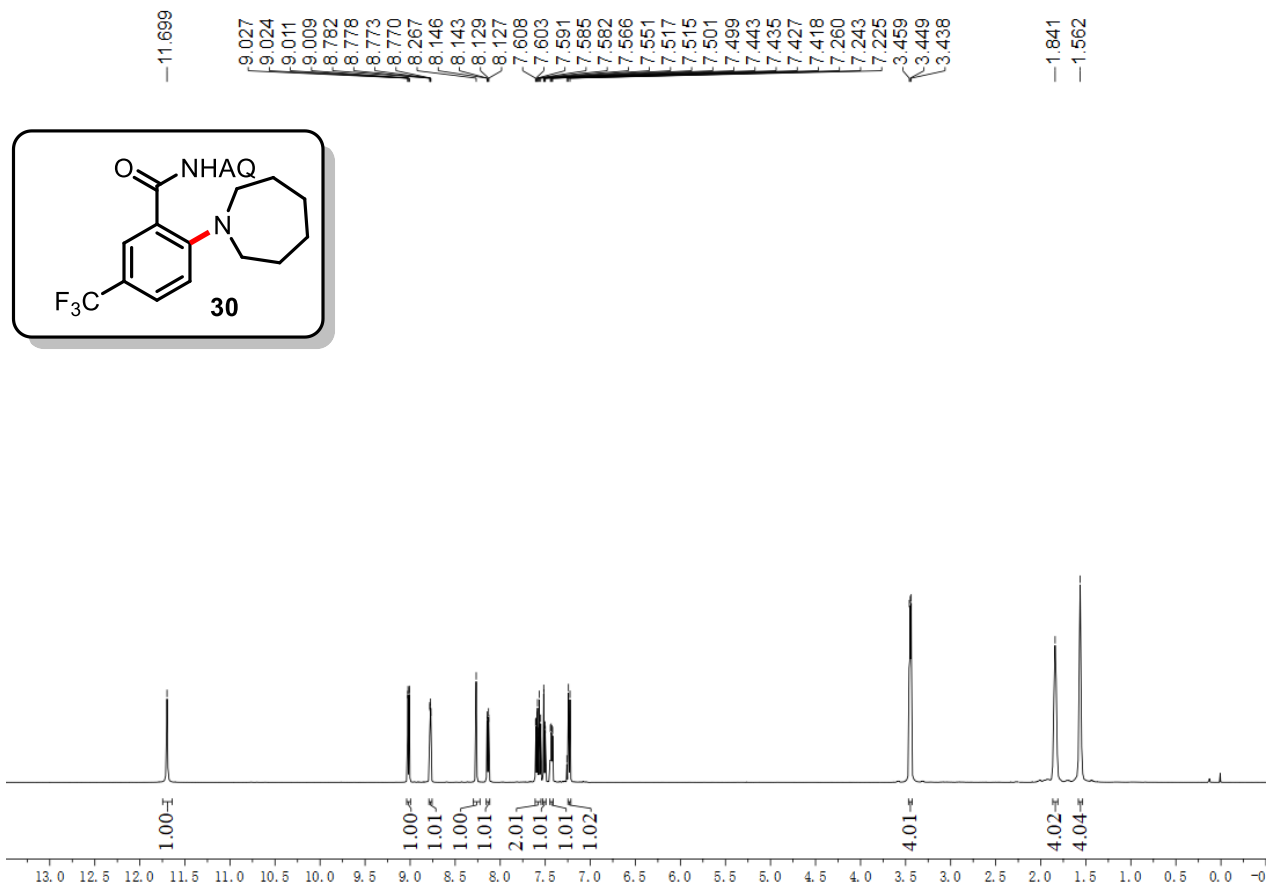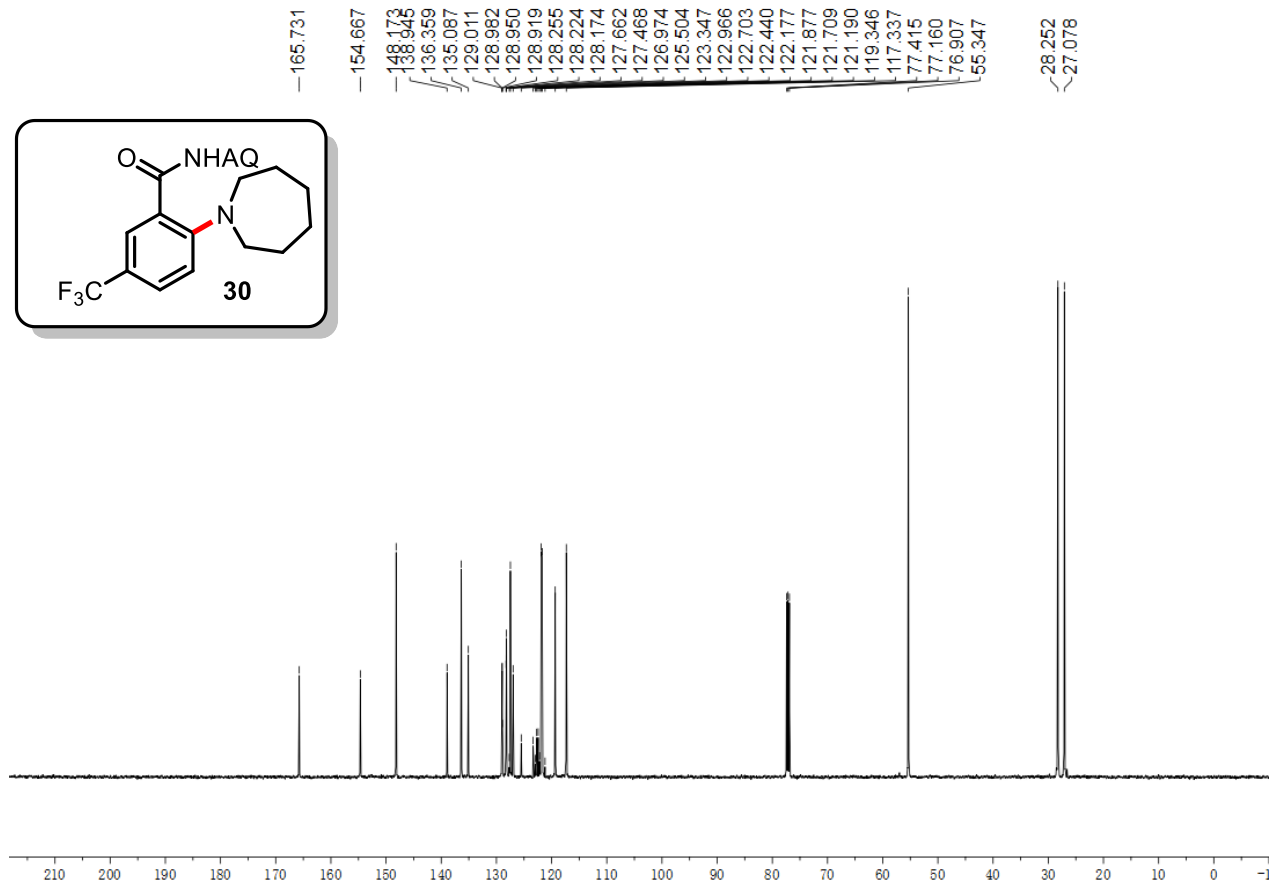



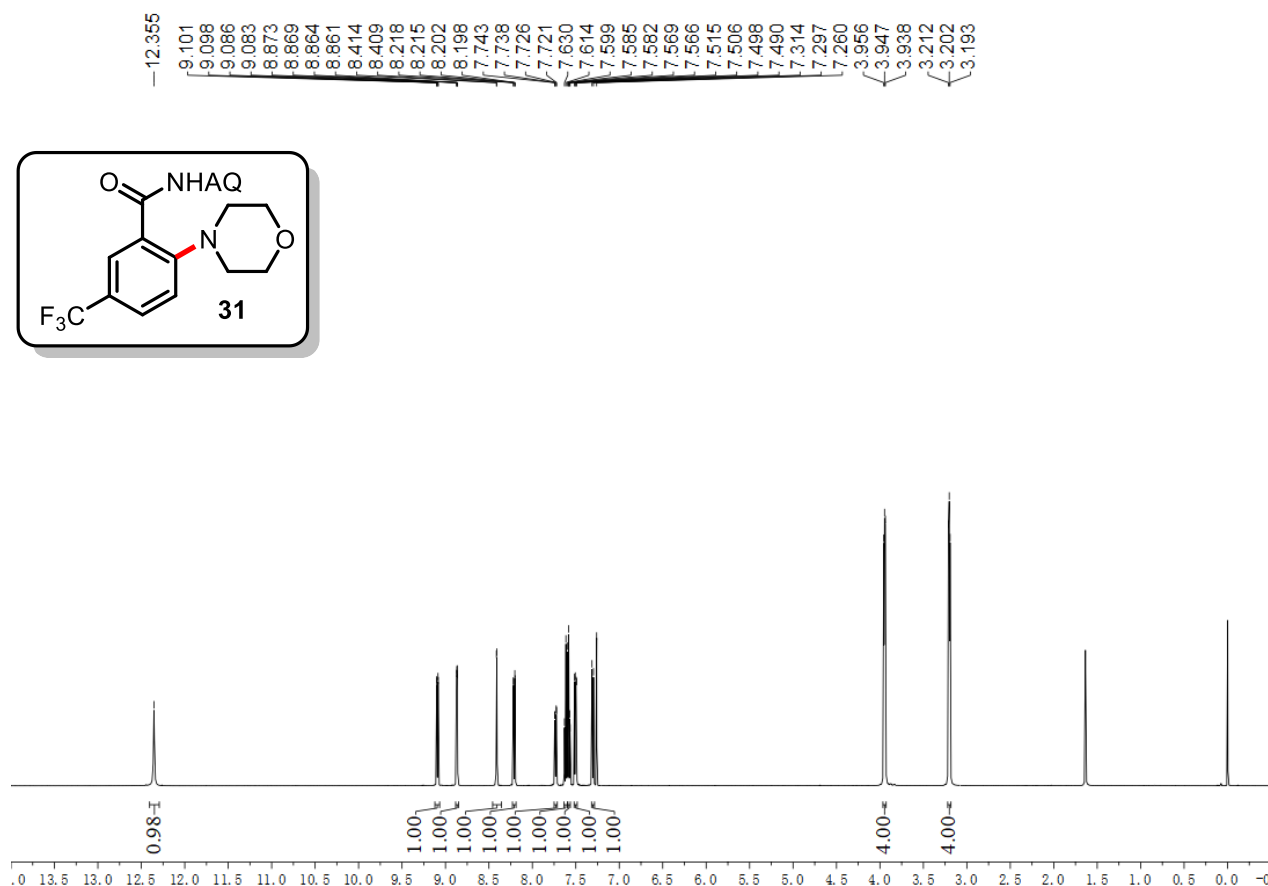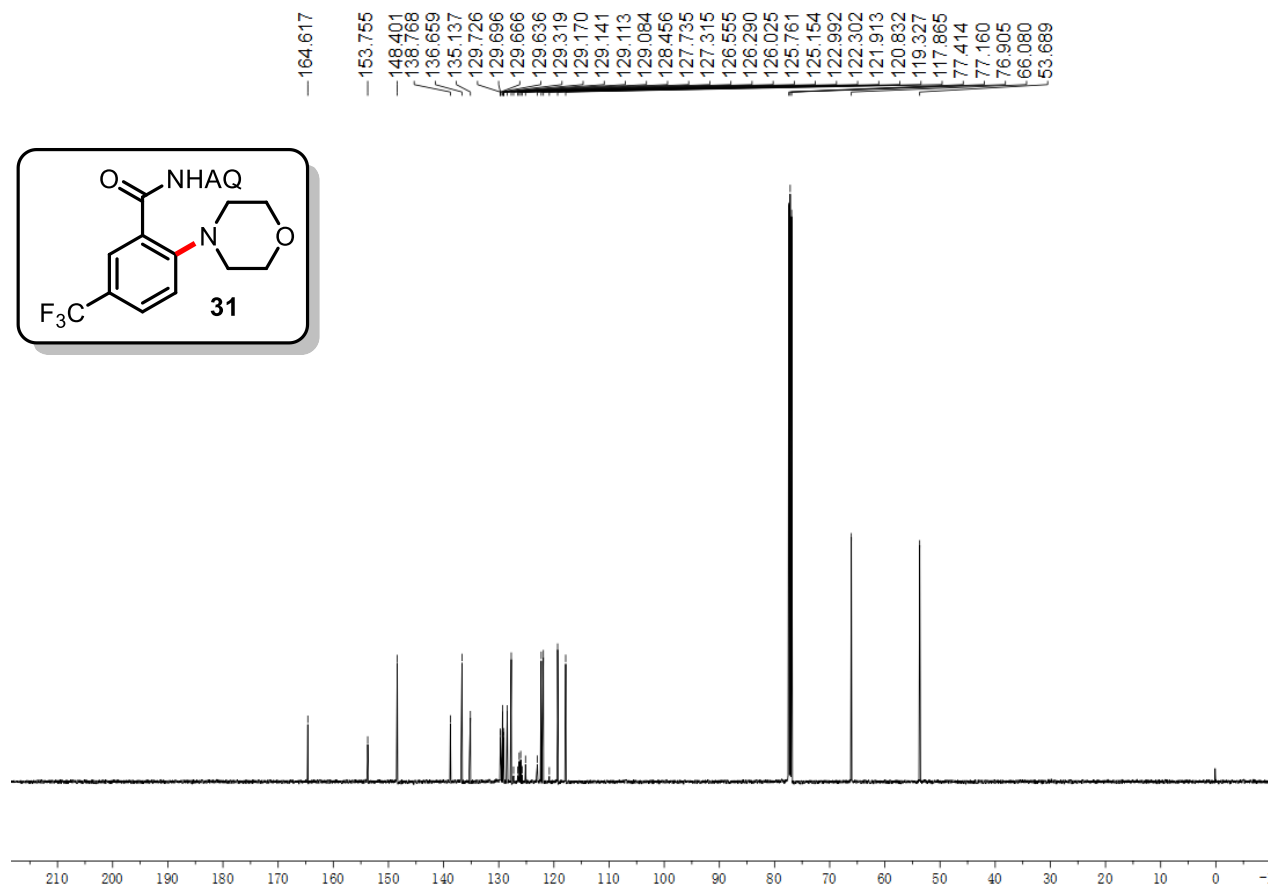

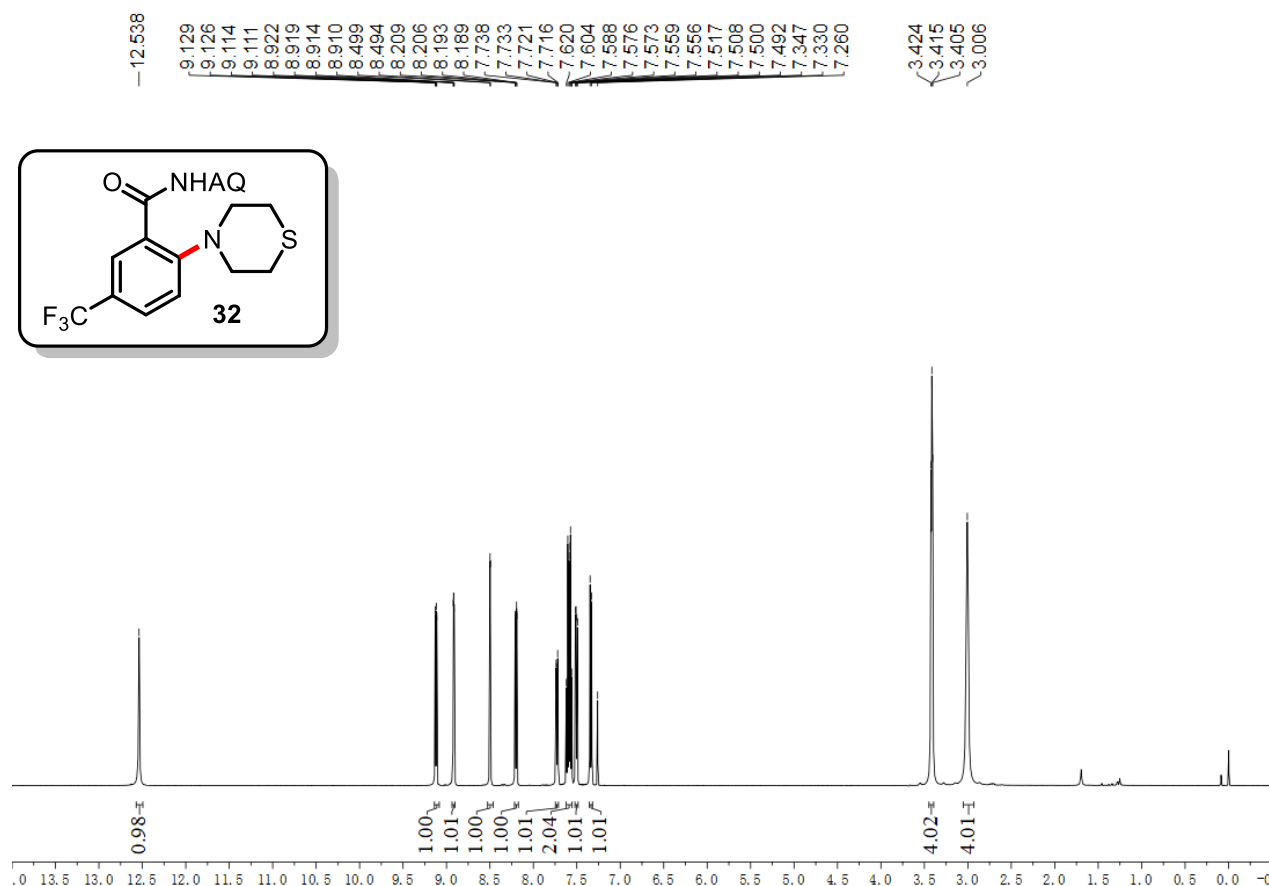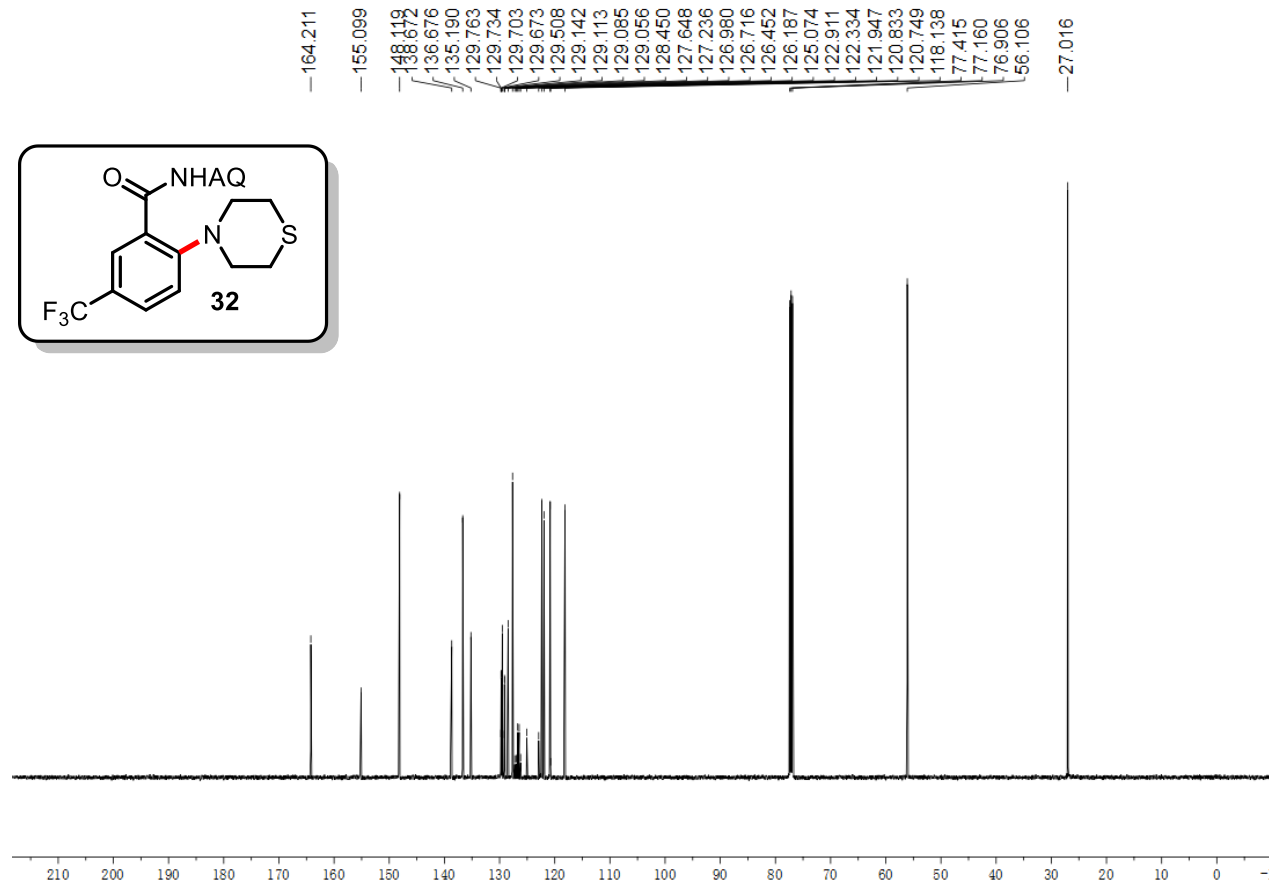

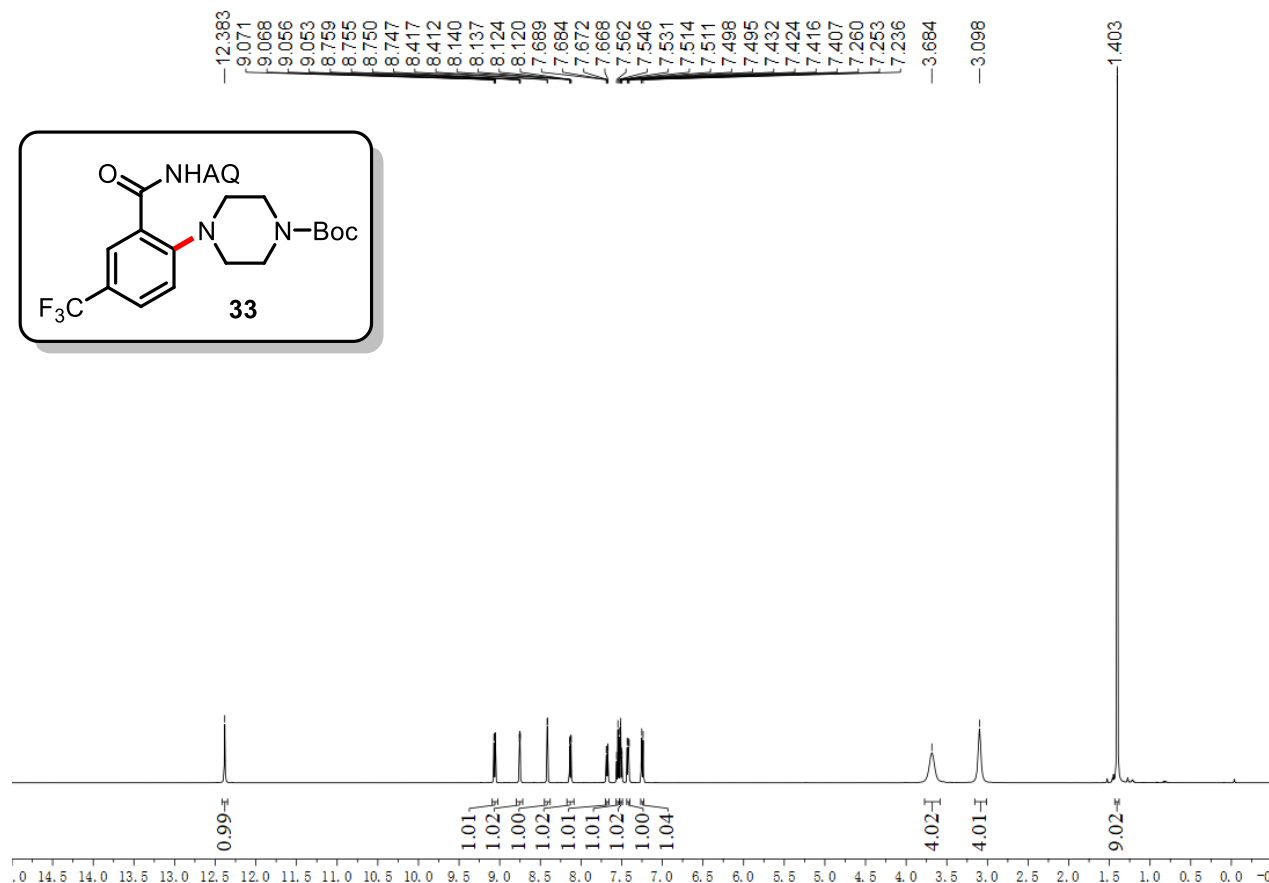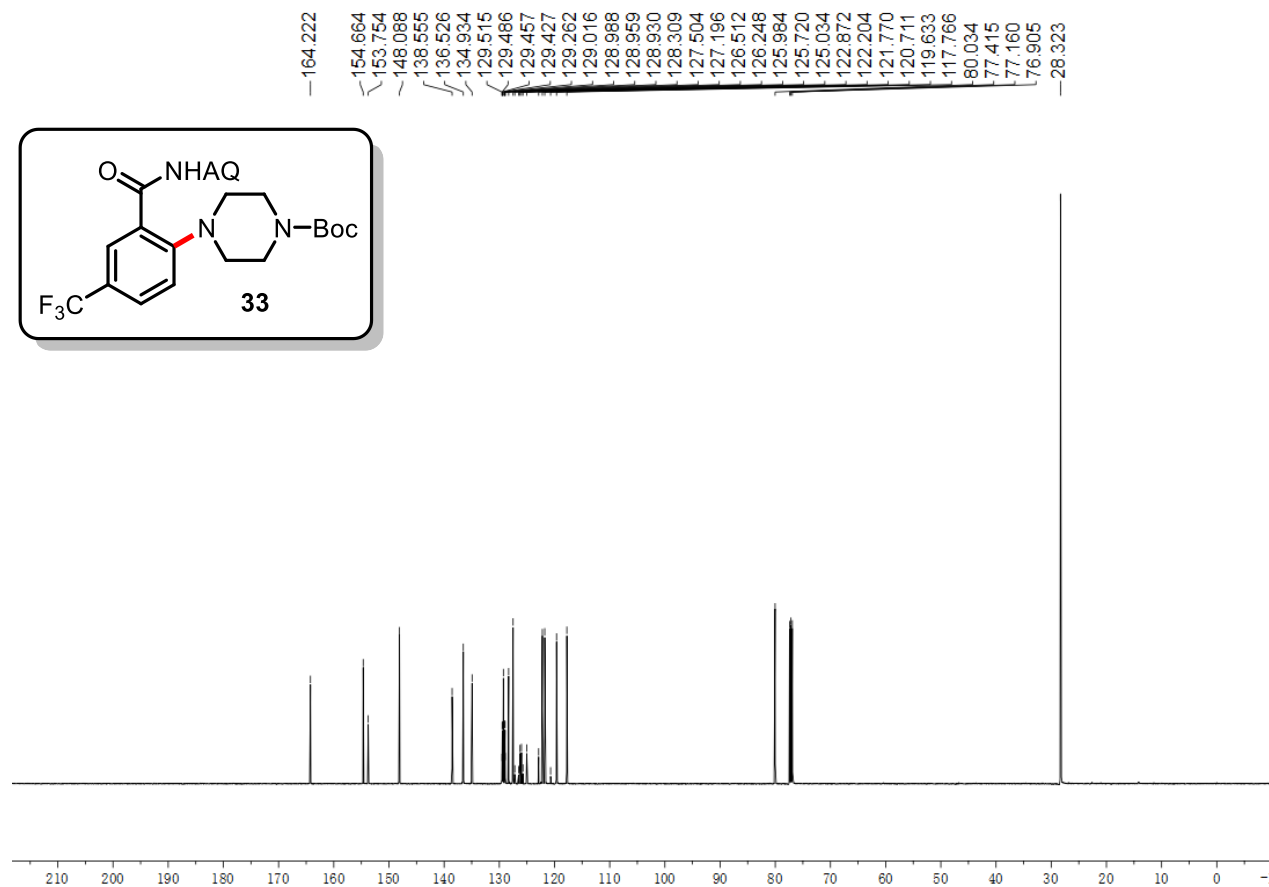

12.466  
9.138  
9.123  
8.682  
8.678  
8.673  
8.670  
8.482  
8.478  
8.129  
8.126  
8.113  
8.109  
7.757  
7.752  
7.740  
7.735  
7.719  
7.603  
7.587  
7.549  
7.546  
7.533  
7.530  
7.368  
7.357  
7.349  
7.341  
7.332  
7.260  
7.241  
7.226  
7.224  
7.209  
6.869  
6.854  
6.844  
6.829  
3.488  
3.479  
3.474  
3.468  
3.367  
3.361  
3.356  
3.347

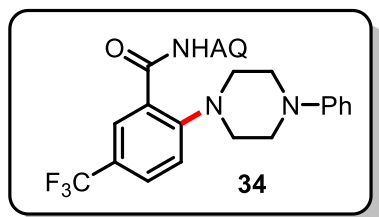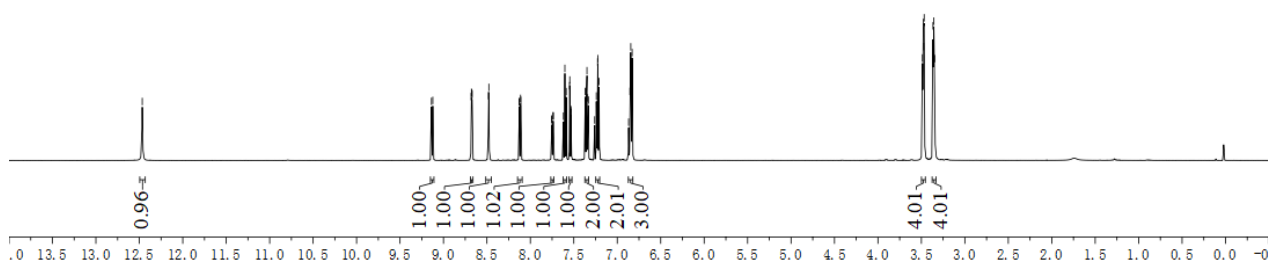

164.576  
153.920  
151.001  
148.380  
138.729  
136.454  
135.194  
129.683  
129.653  
129.623  
129.593  
129.326  
129.238  
129.117  
129.089  
129.060  
129.031  
128.373  
127.604  
127.343  
126.524  
126.259  
125.995  
125.731  
125.181  
123.019  
122.247  
121.773  
120.859  
120.134  
119.611  
117.897  
116.375  
77.414  
77.161  
76.906  
53.496  
48.556

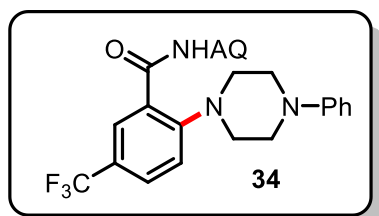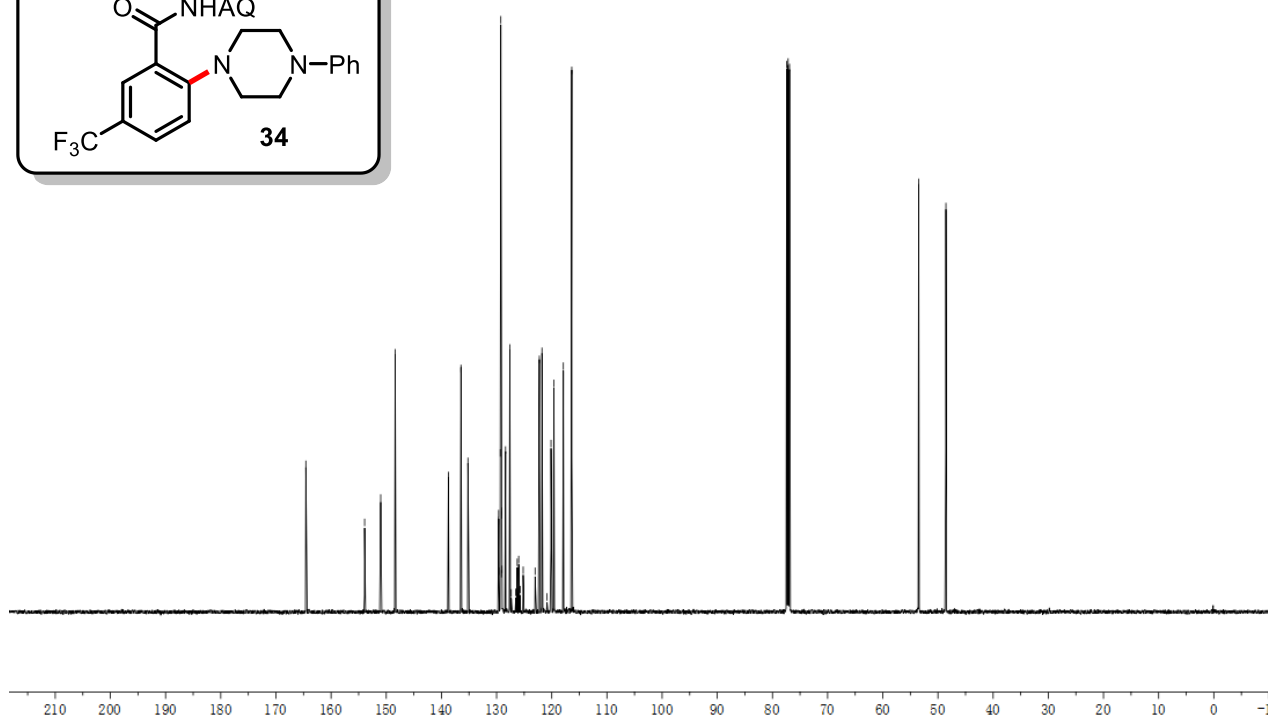

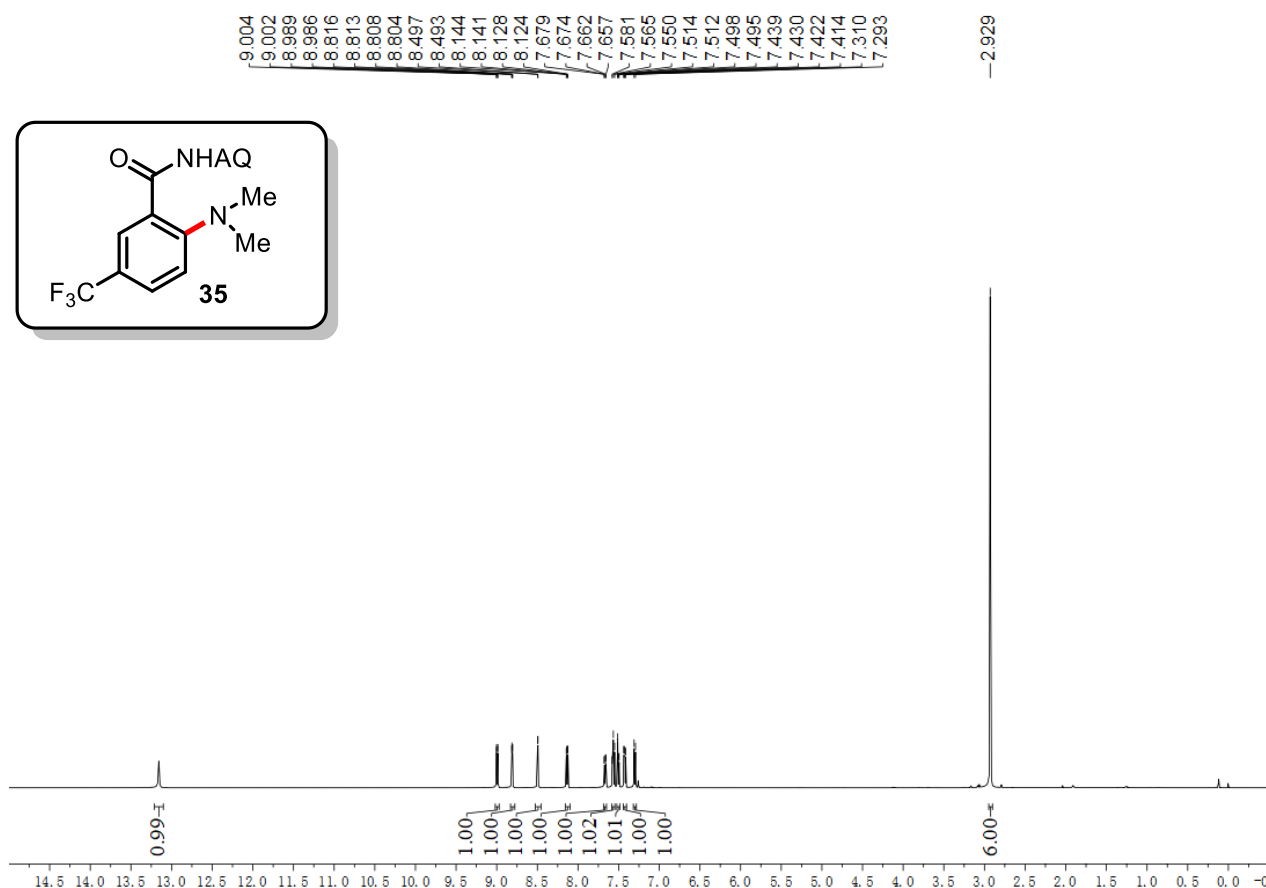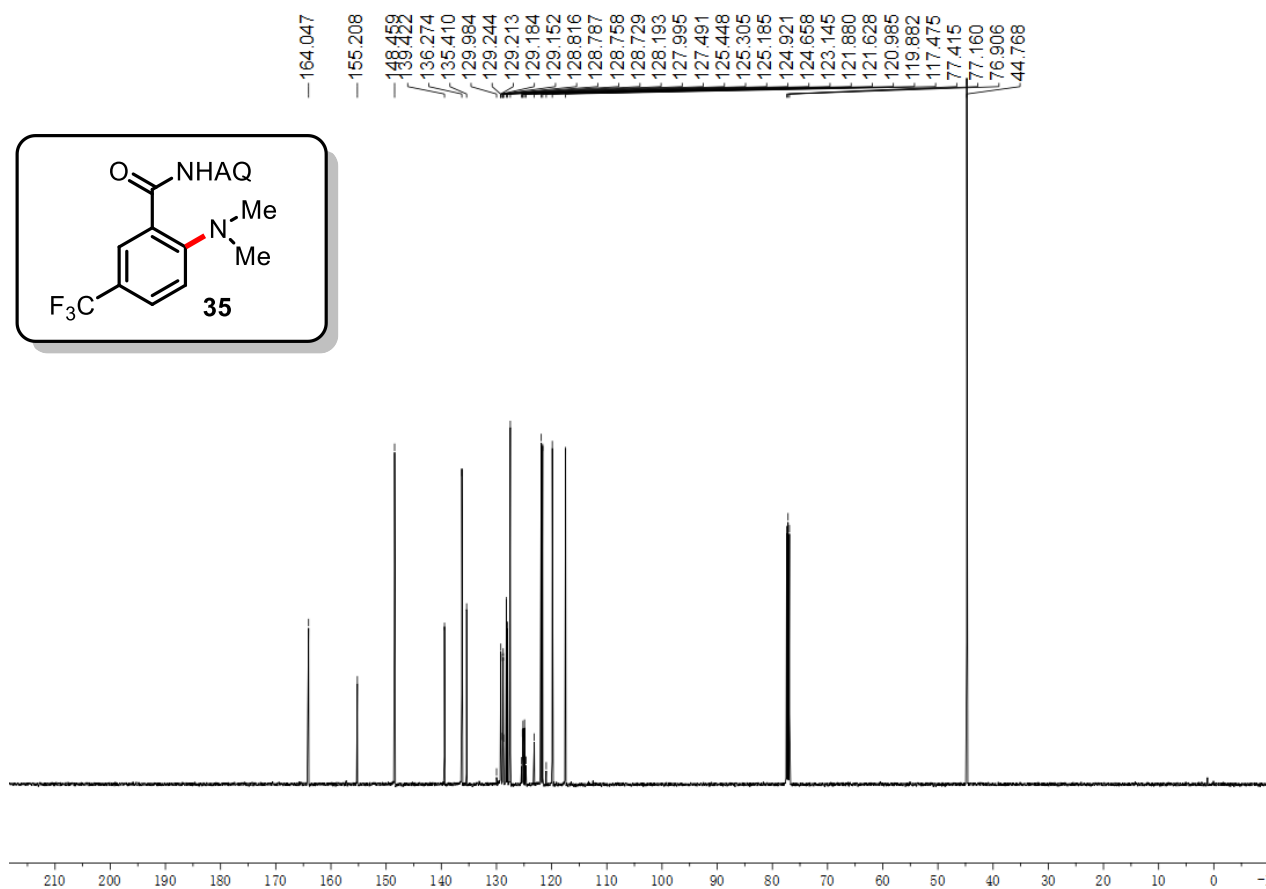

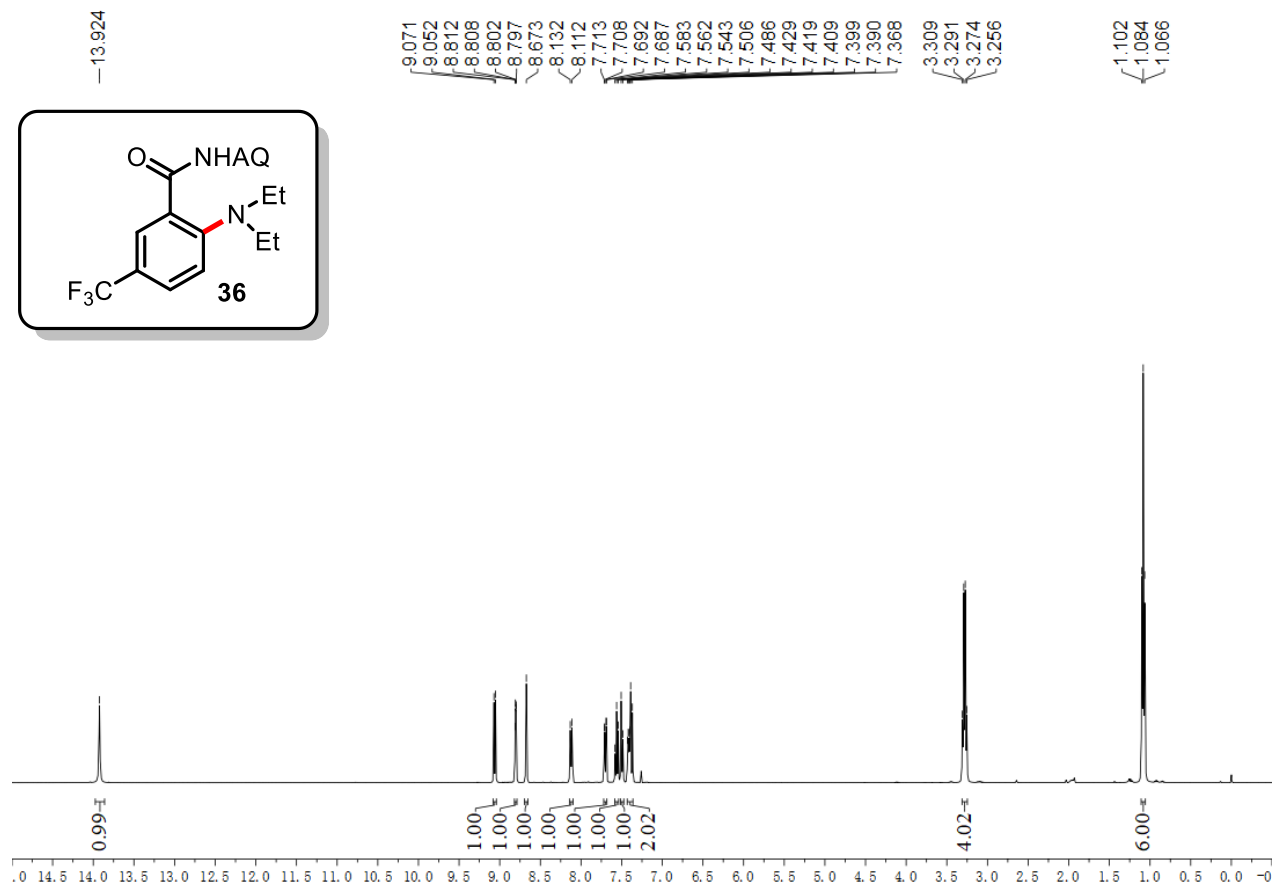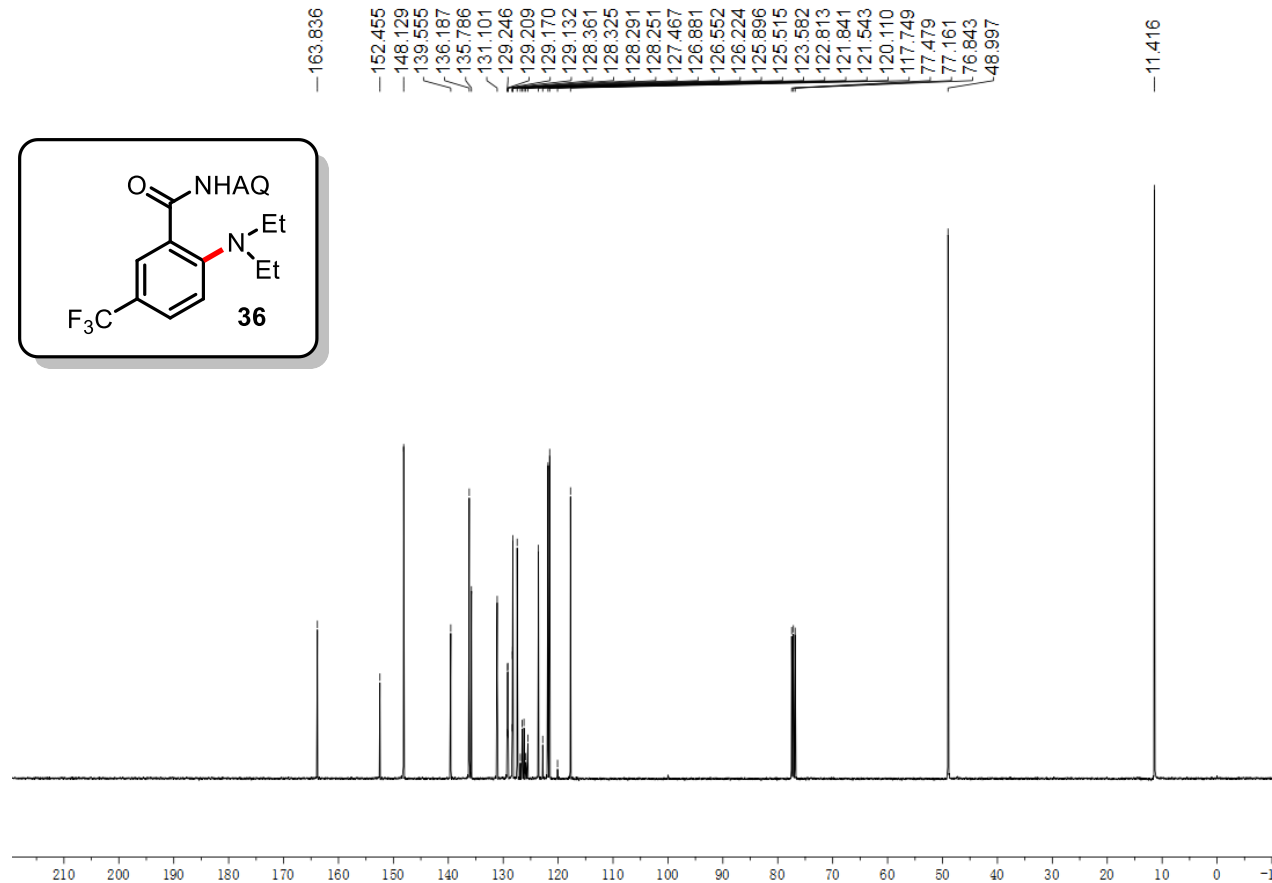

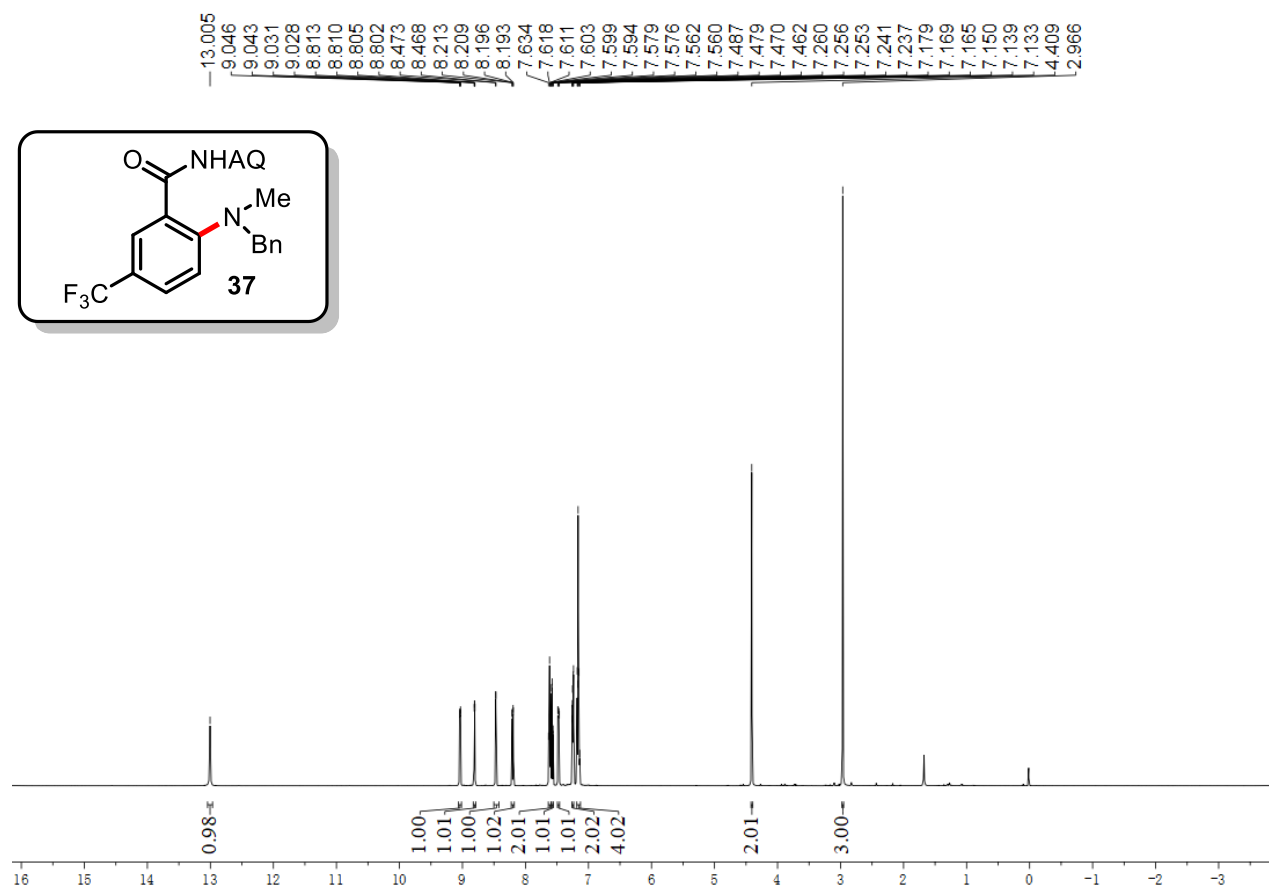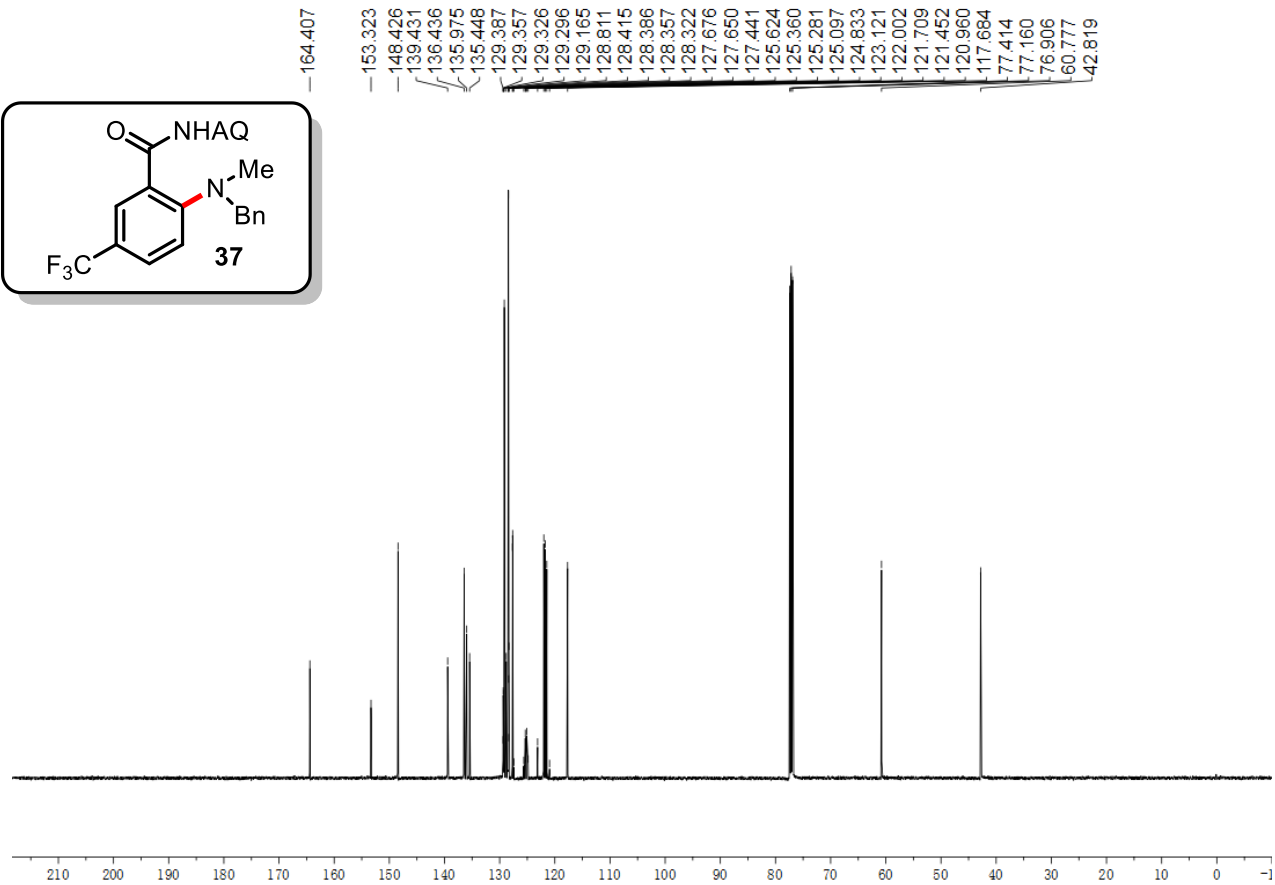

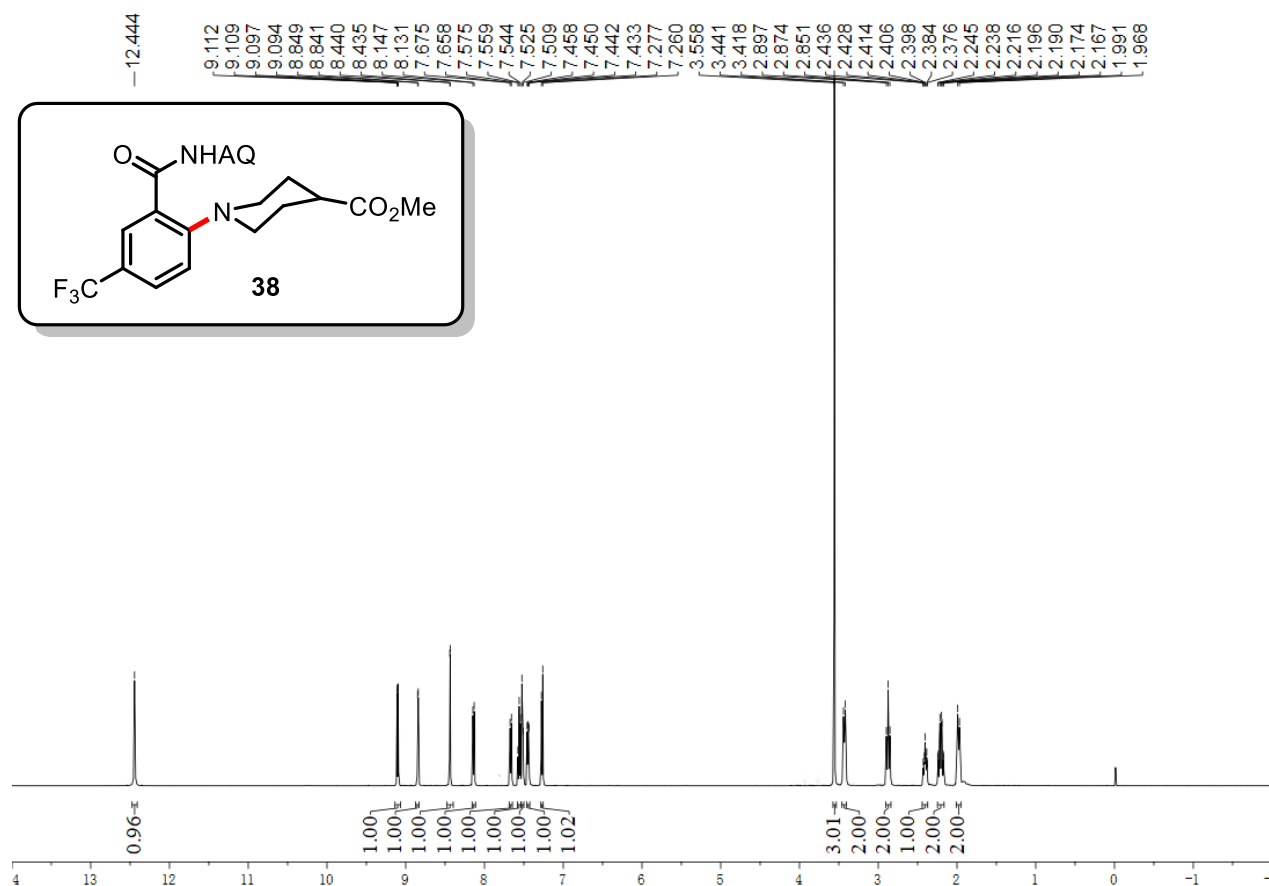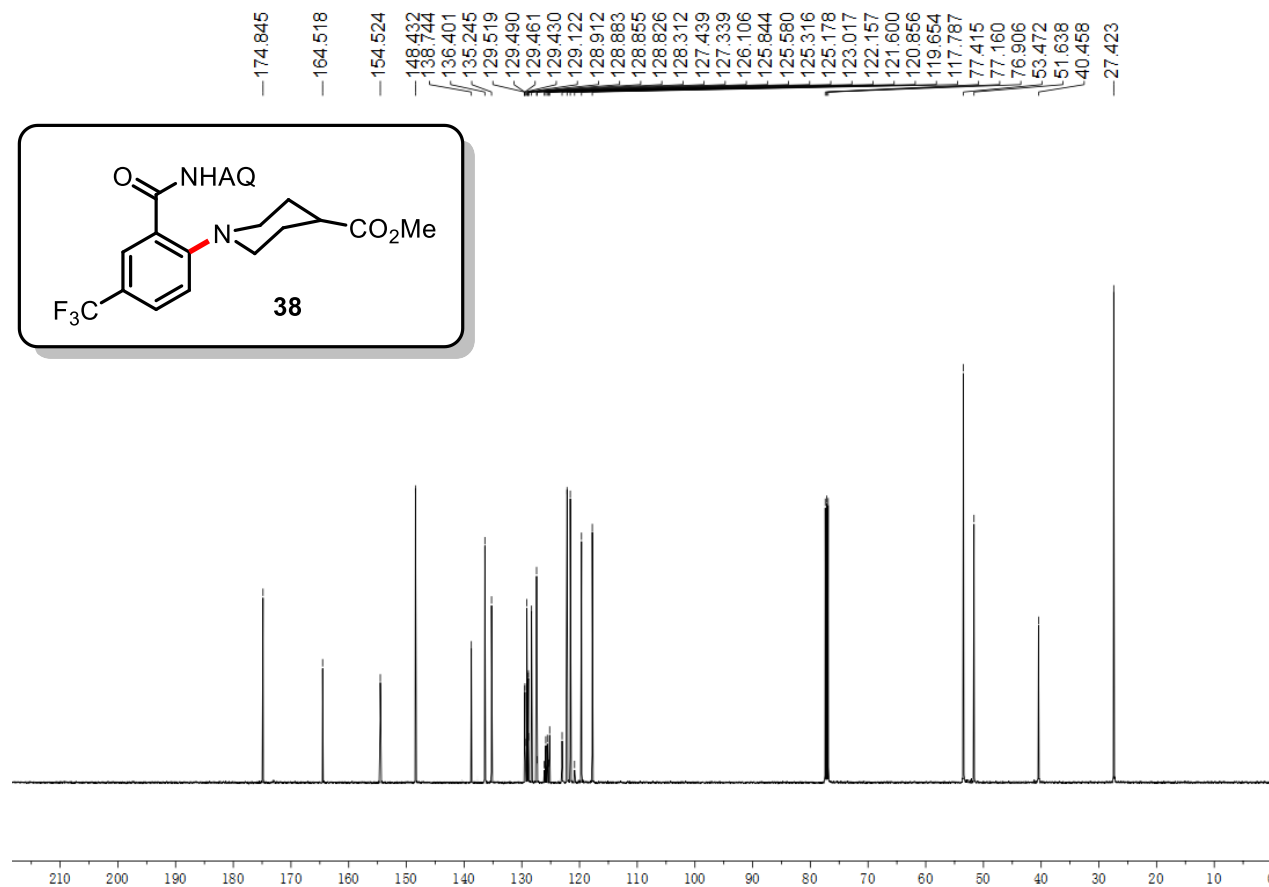



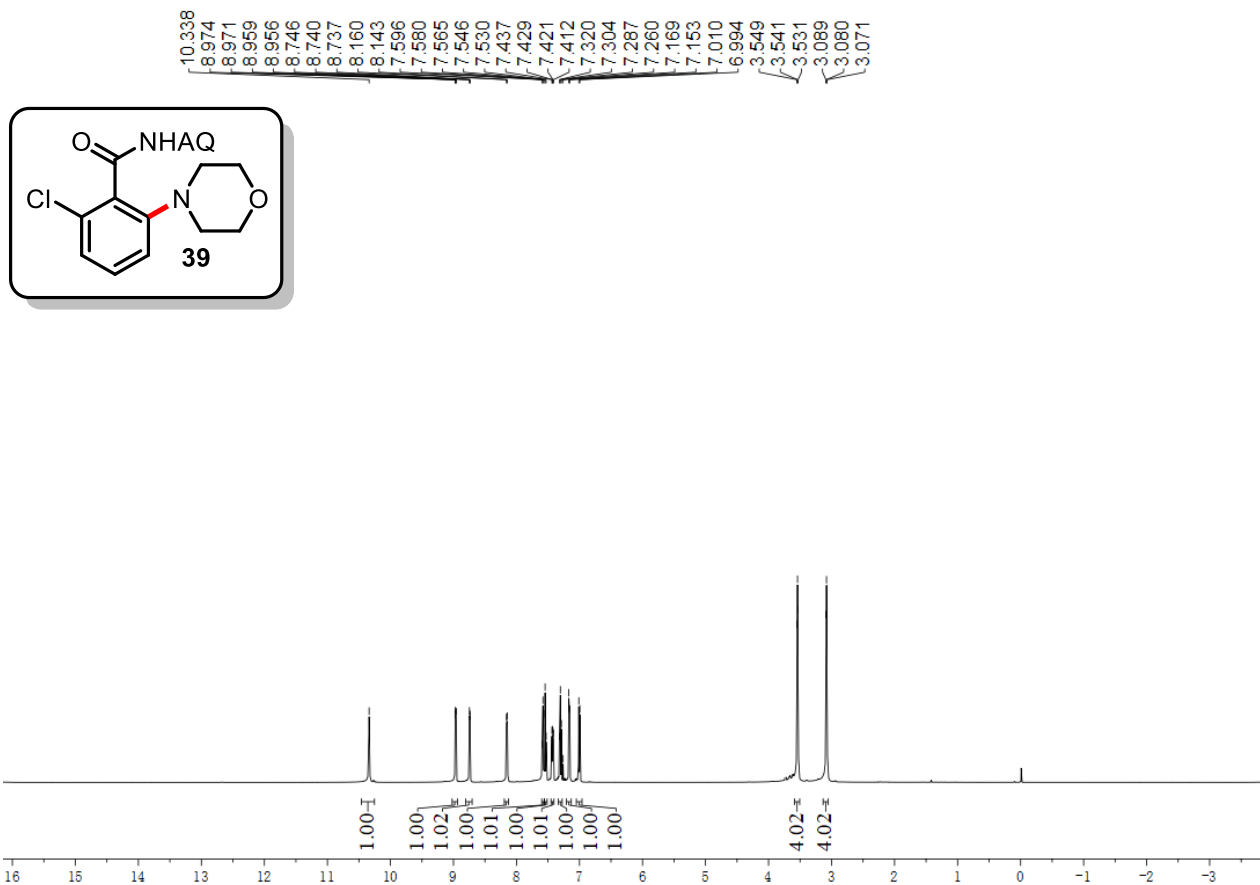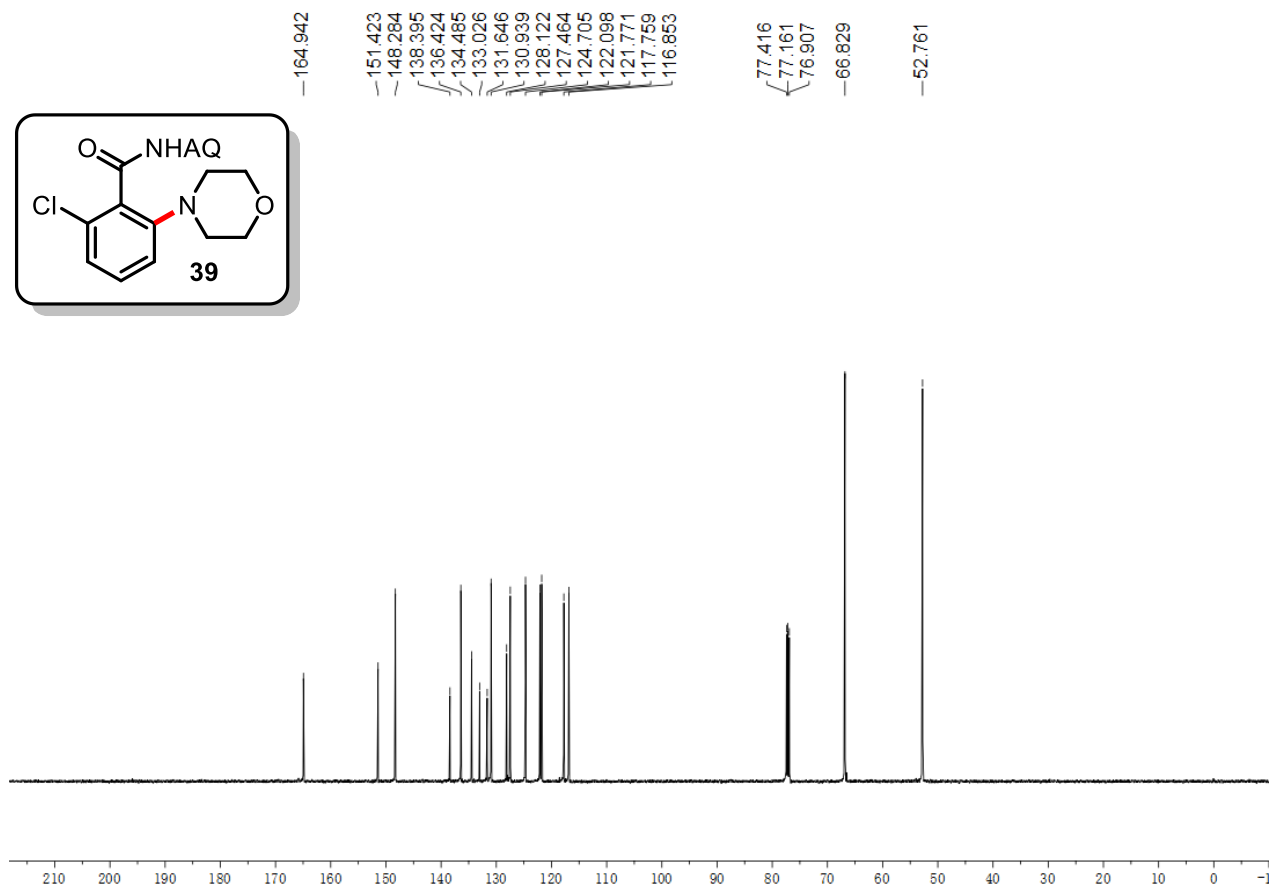

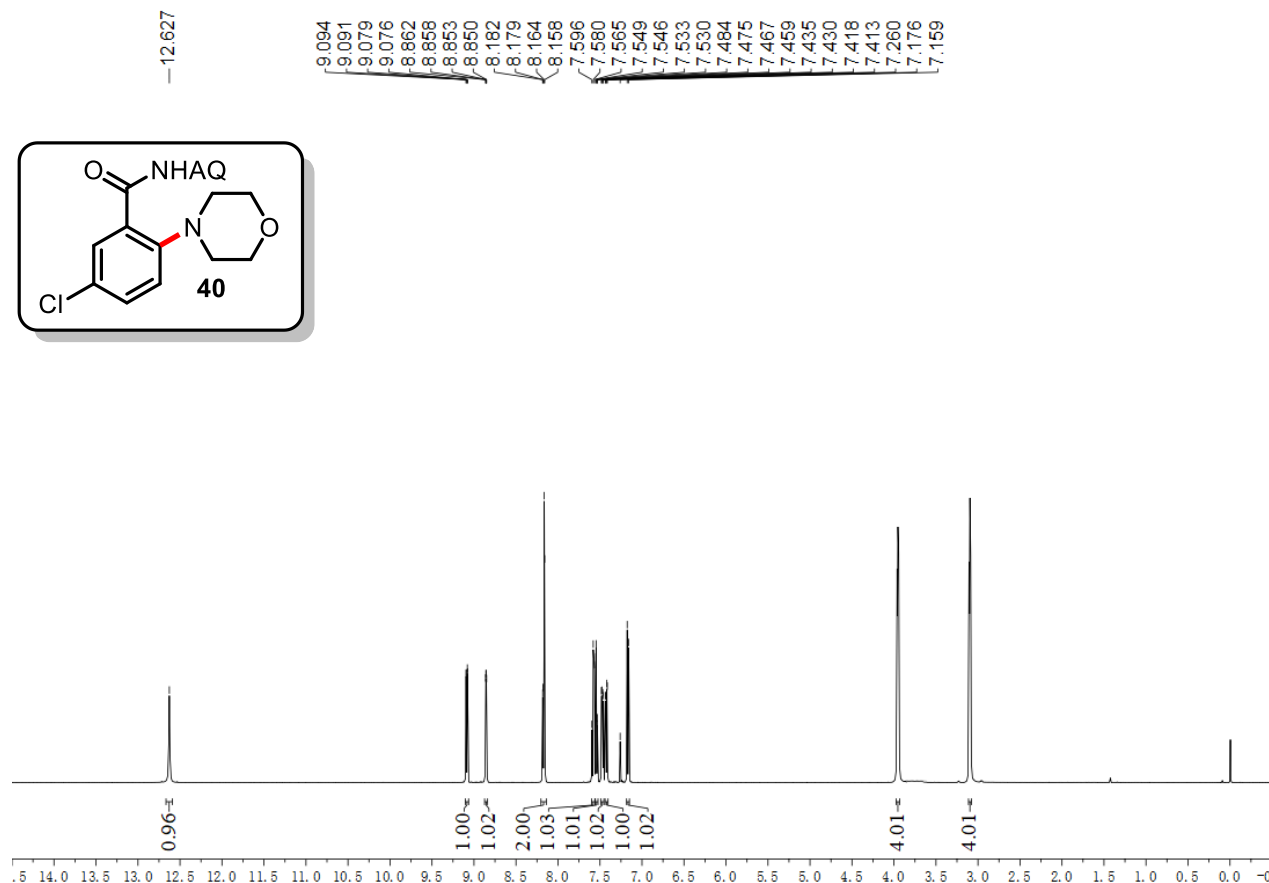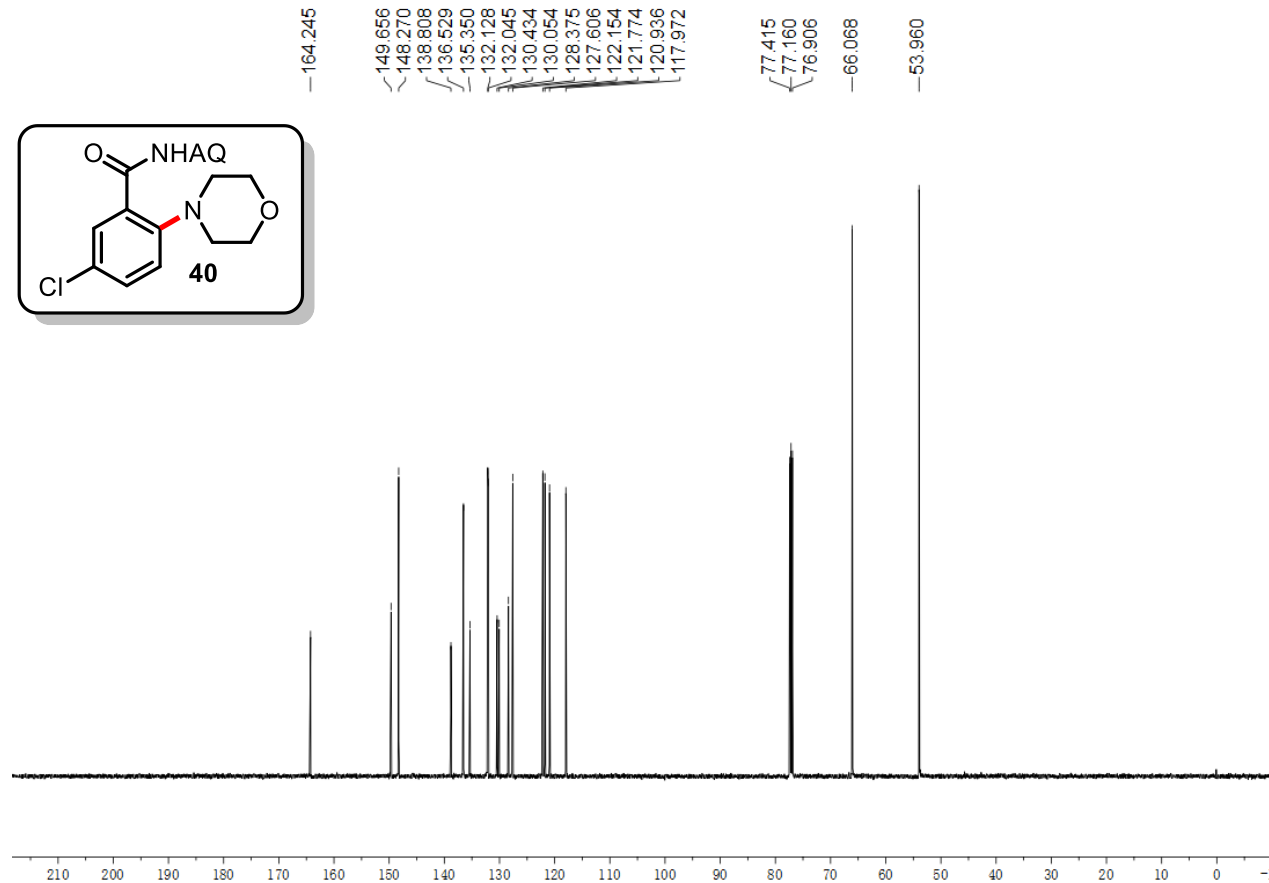

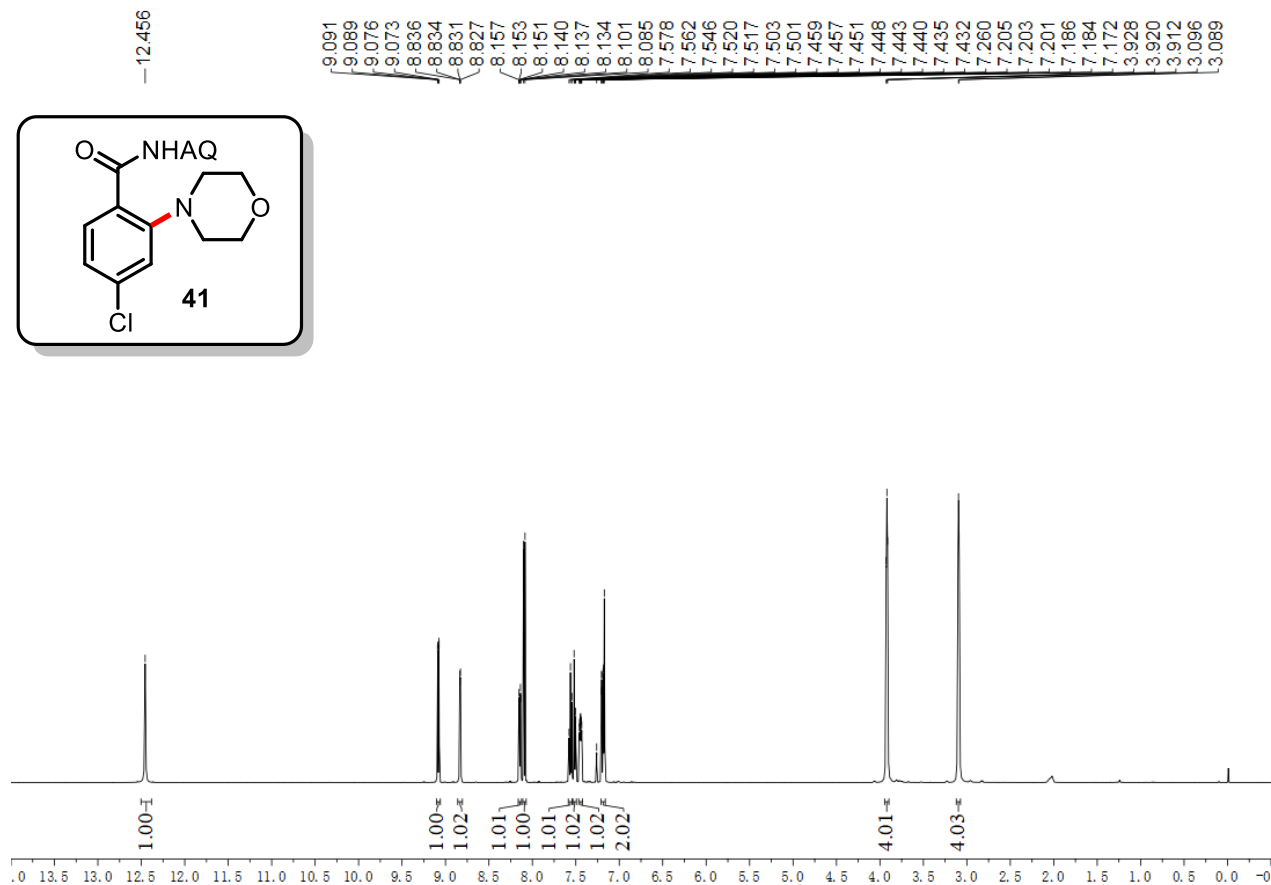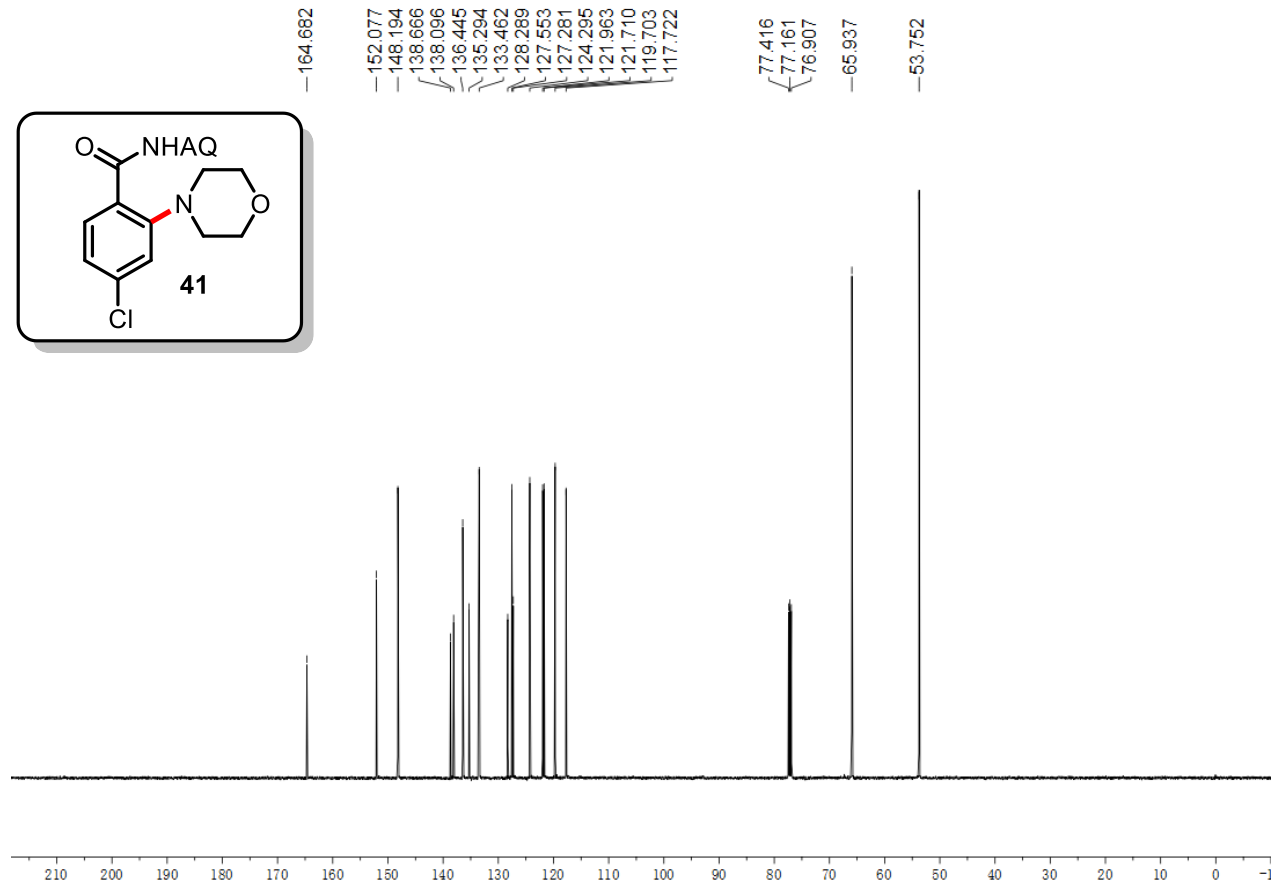

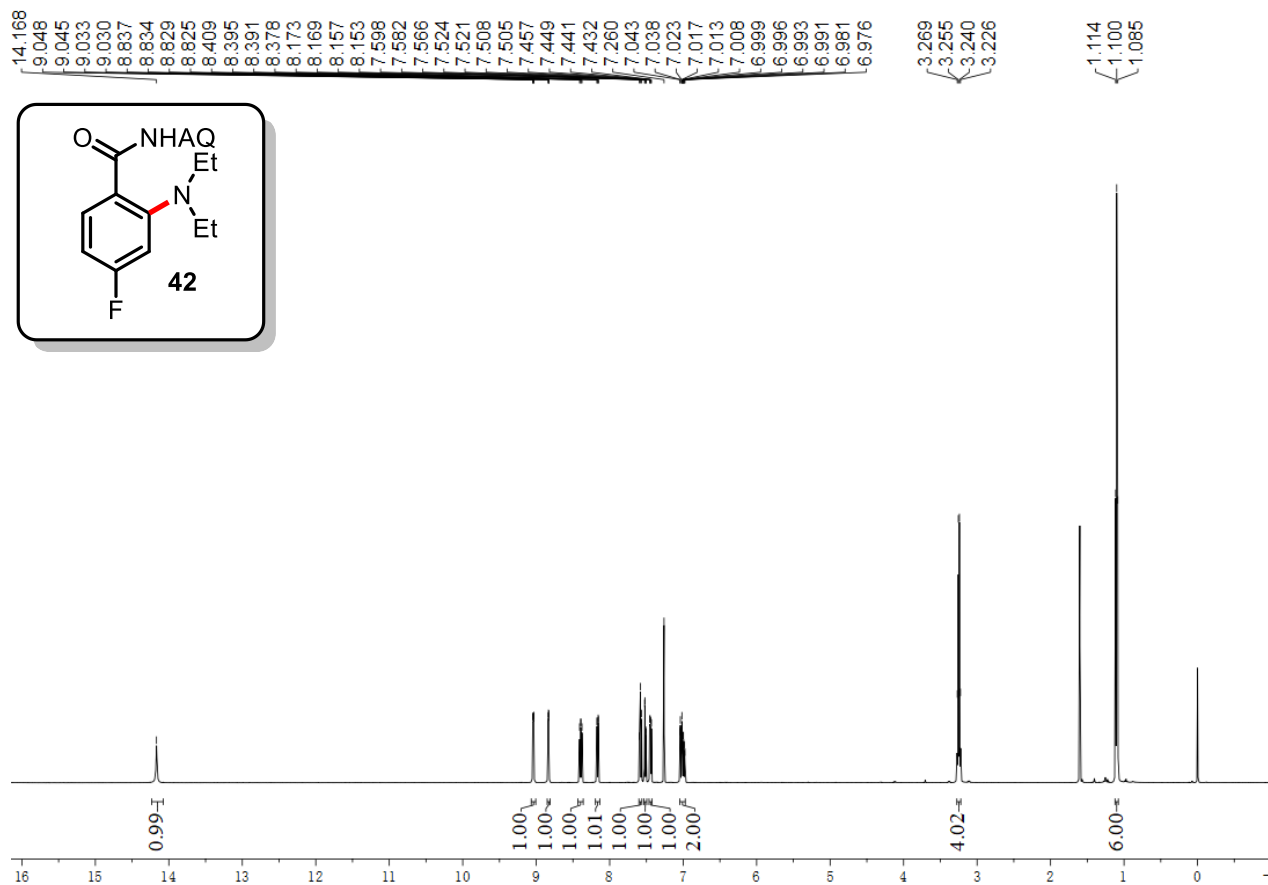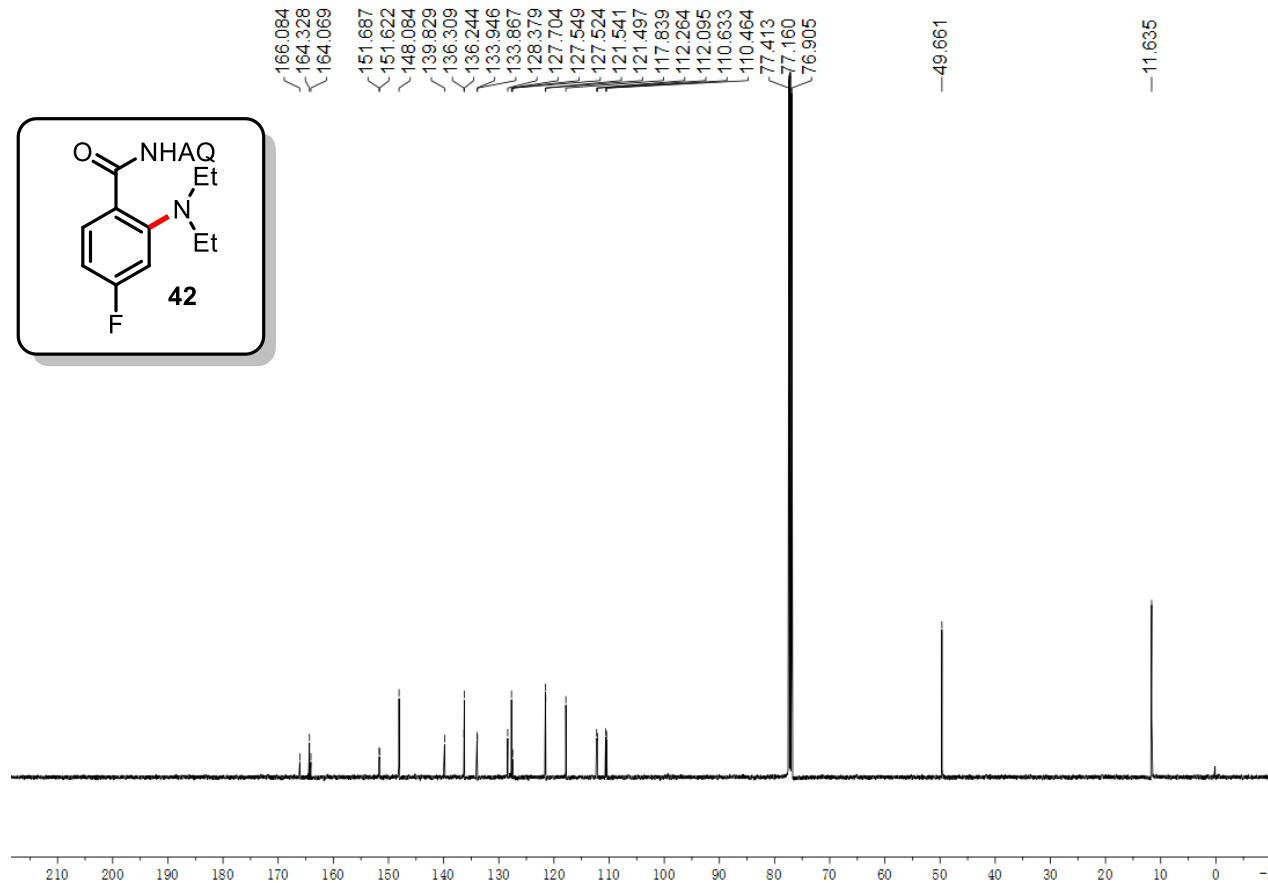

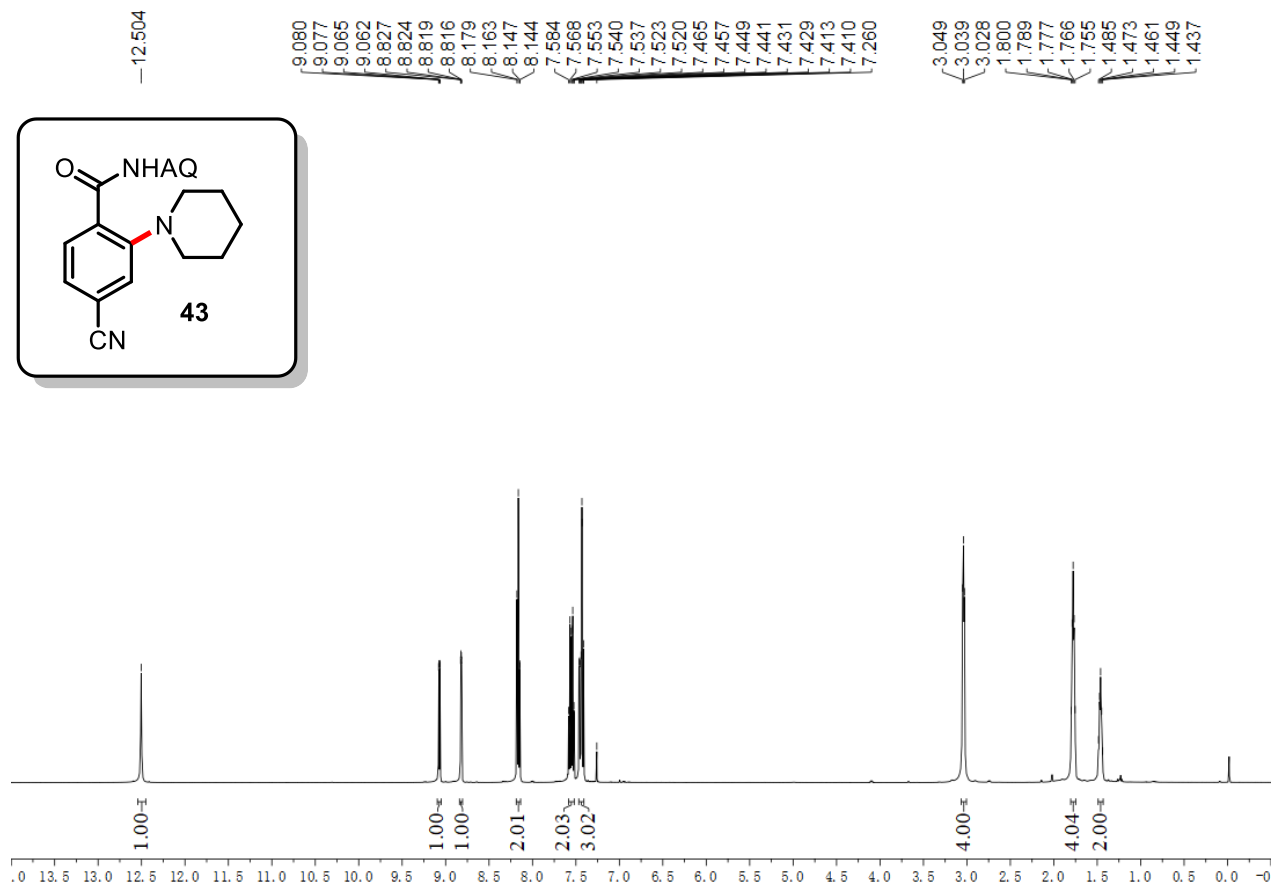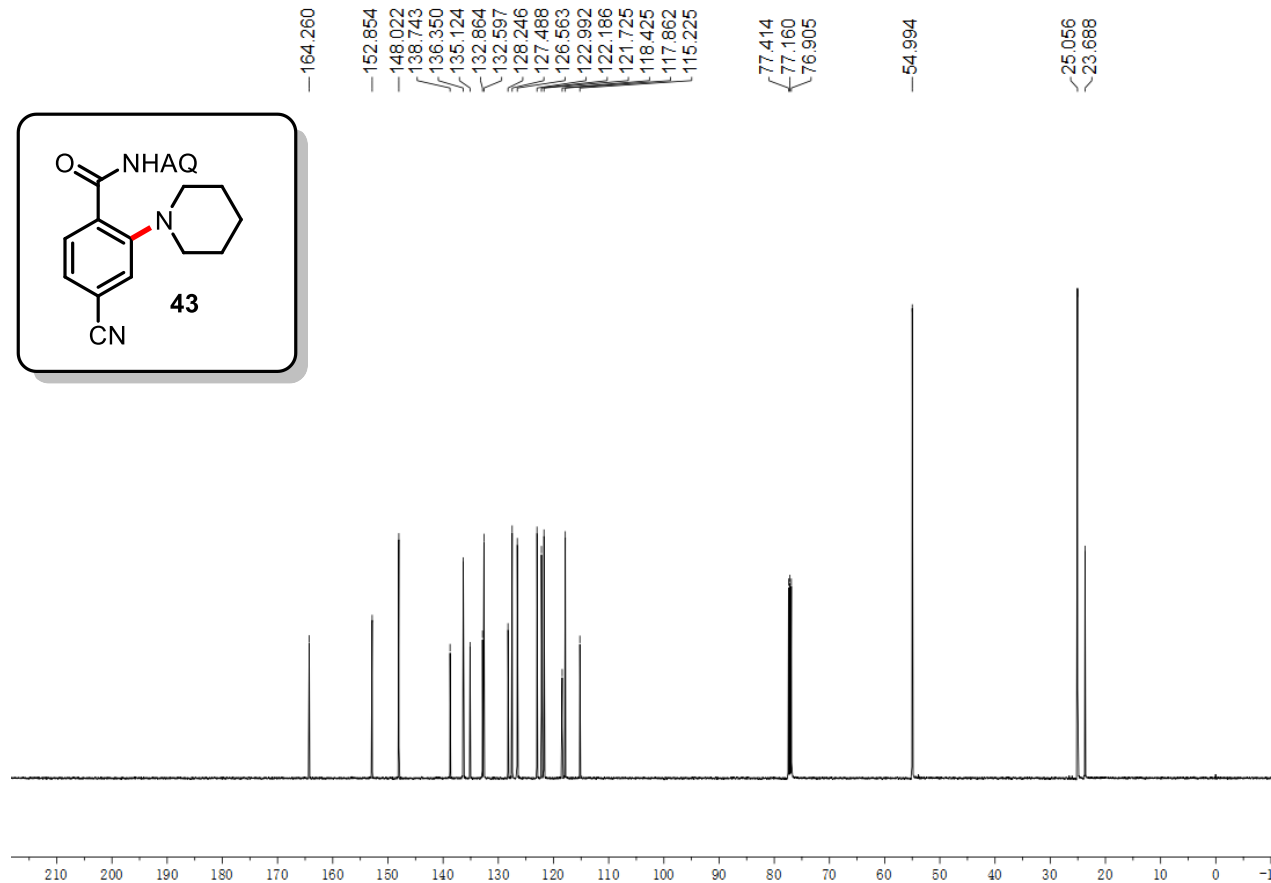

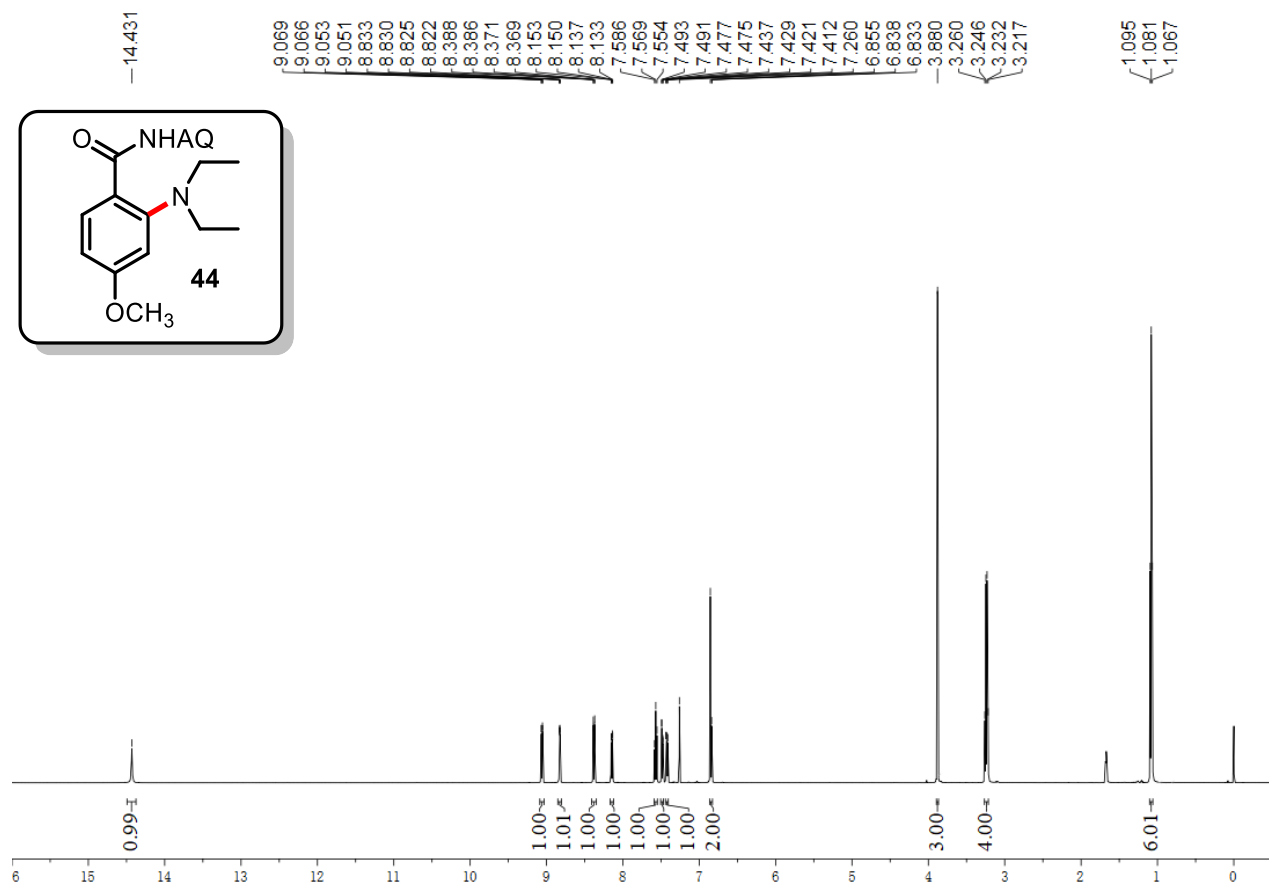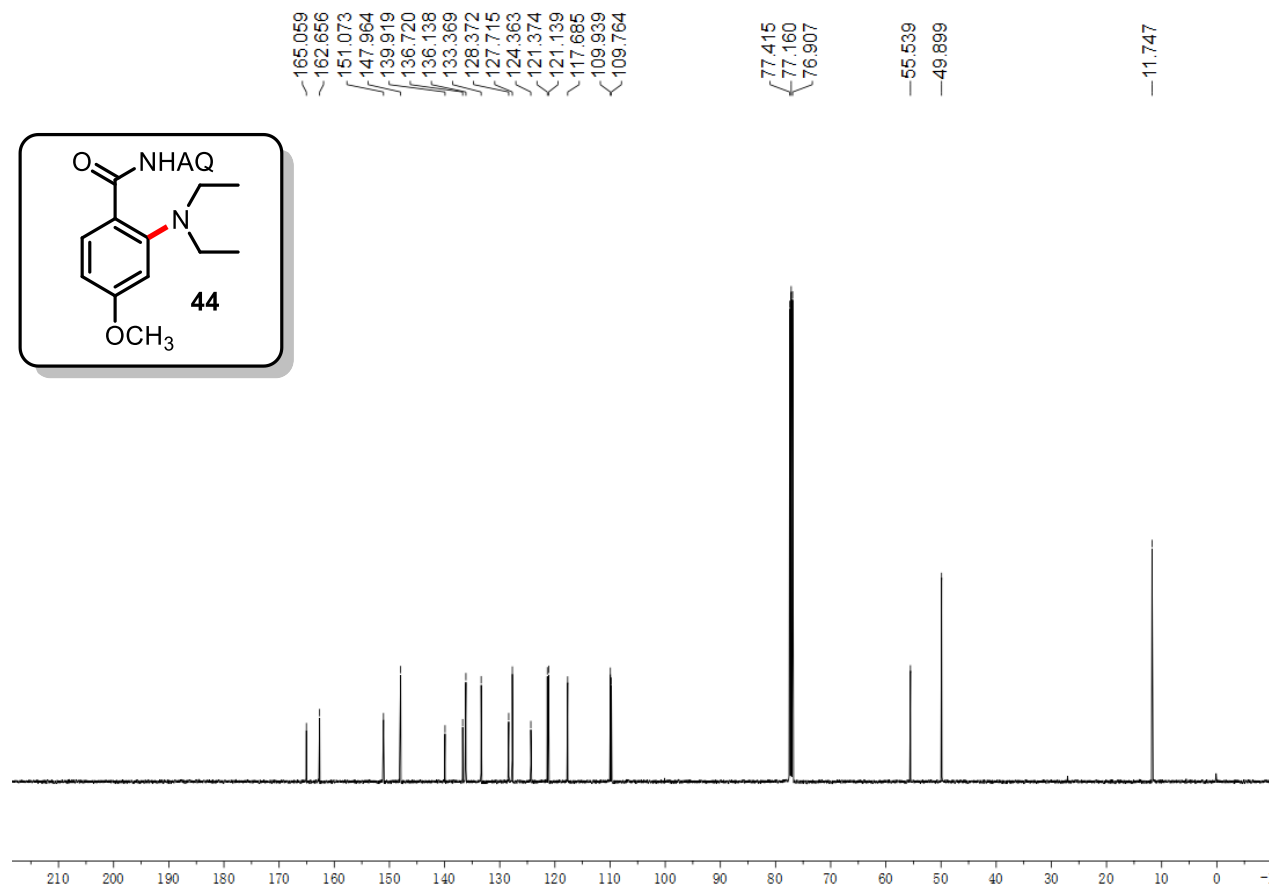

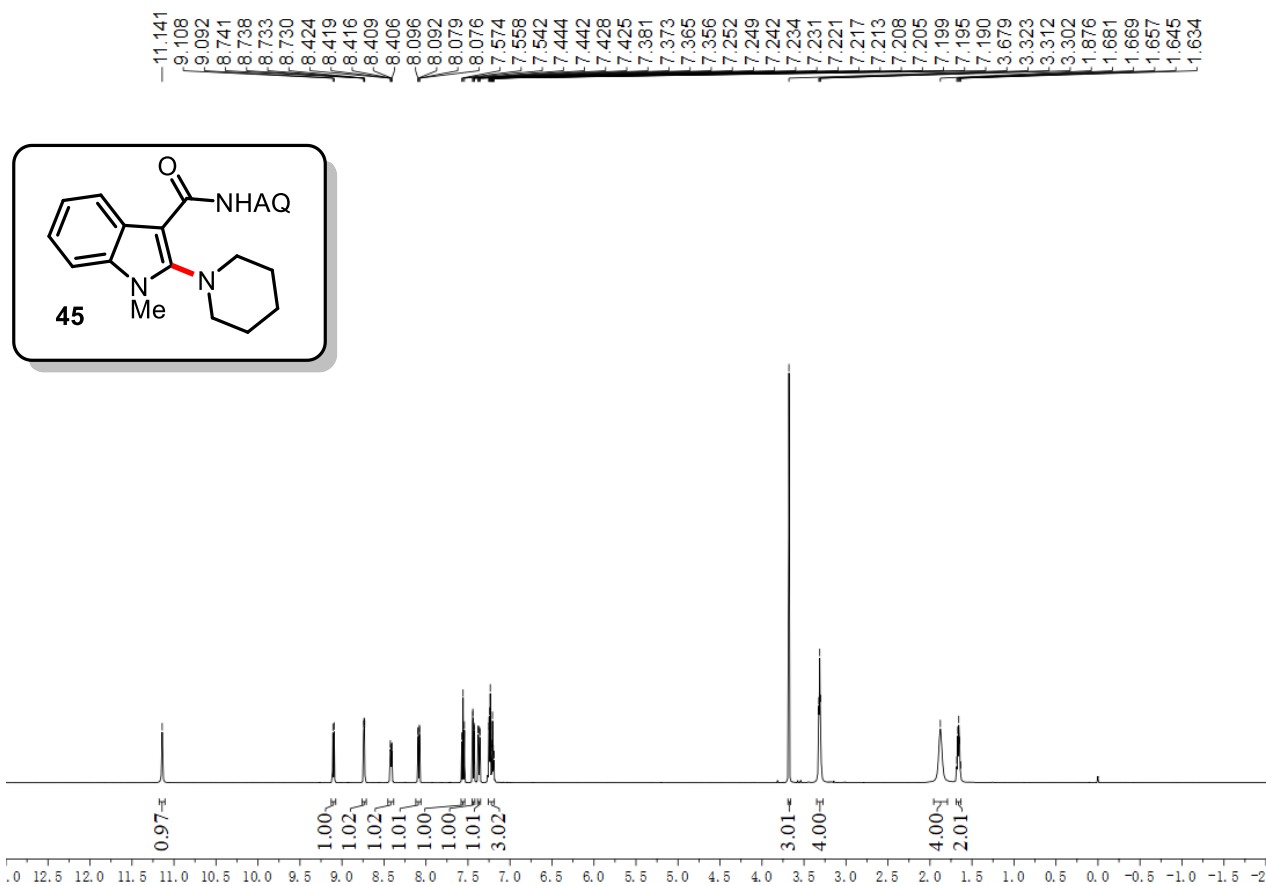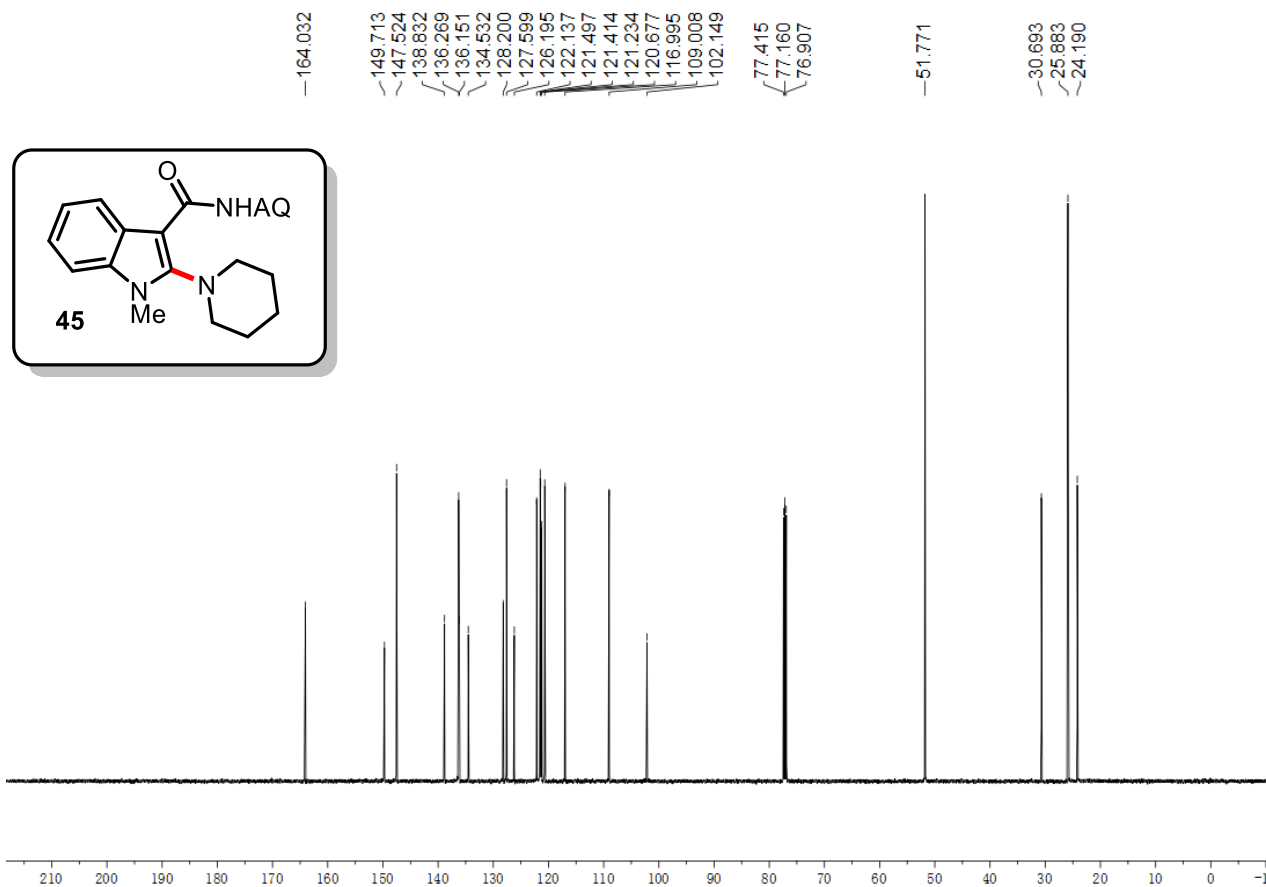

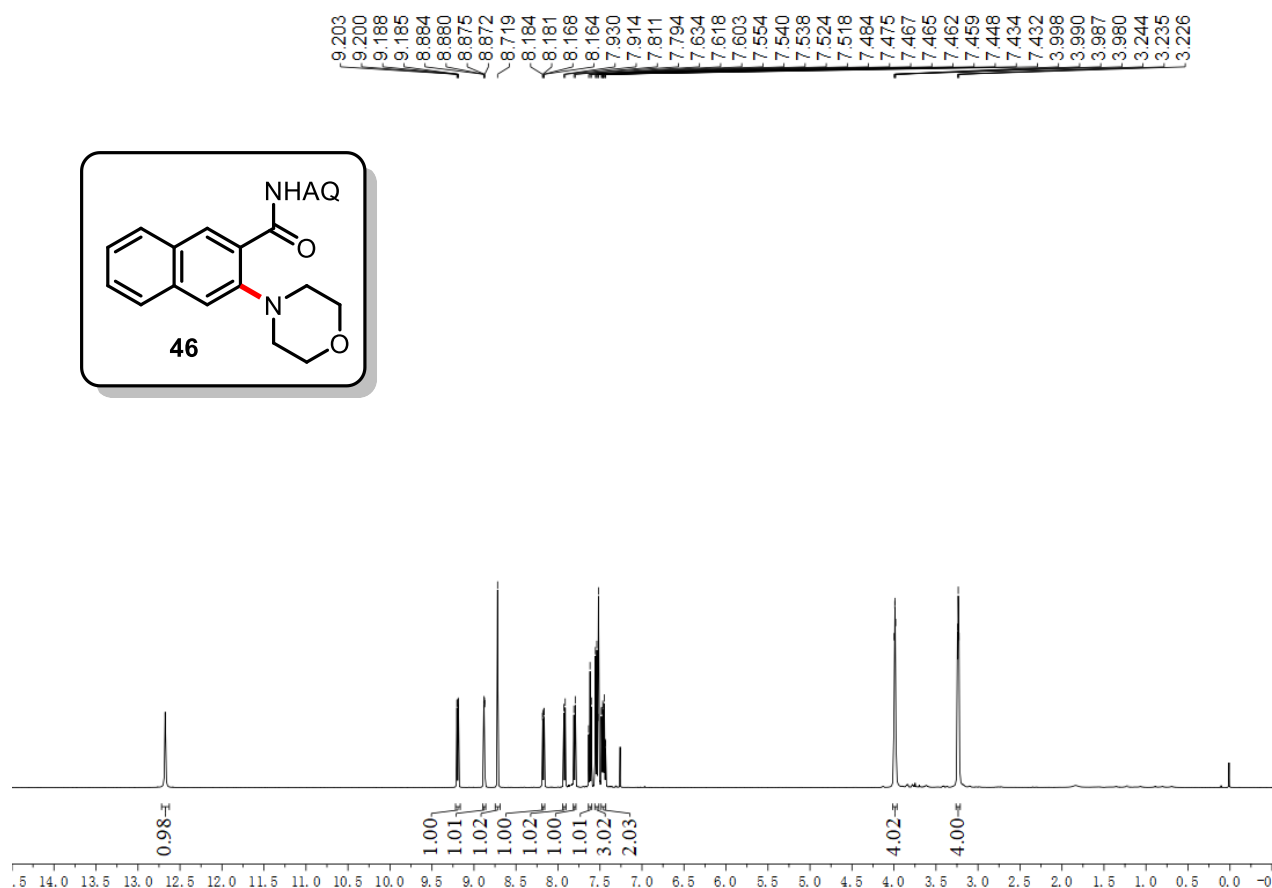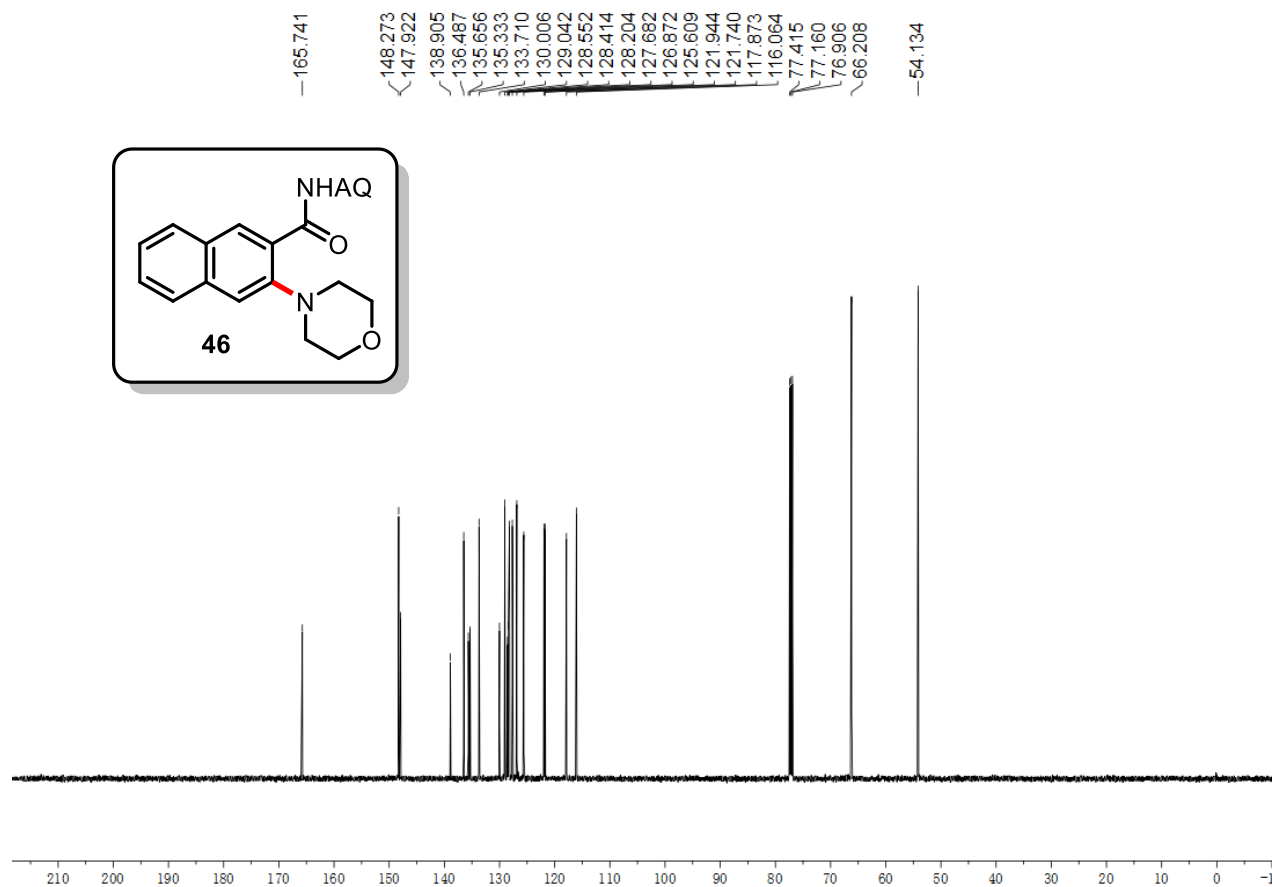



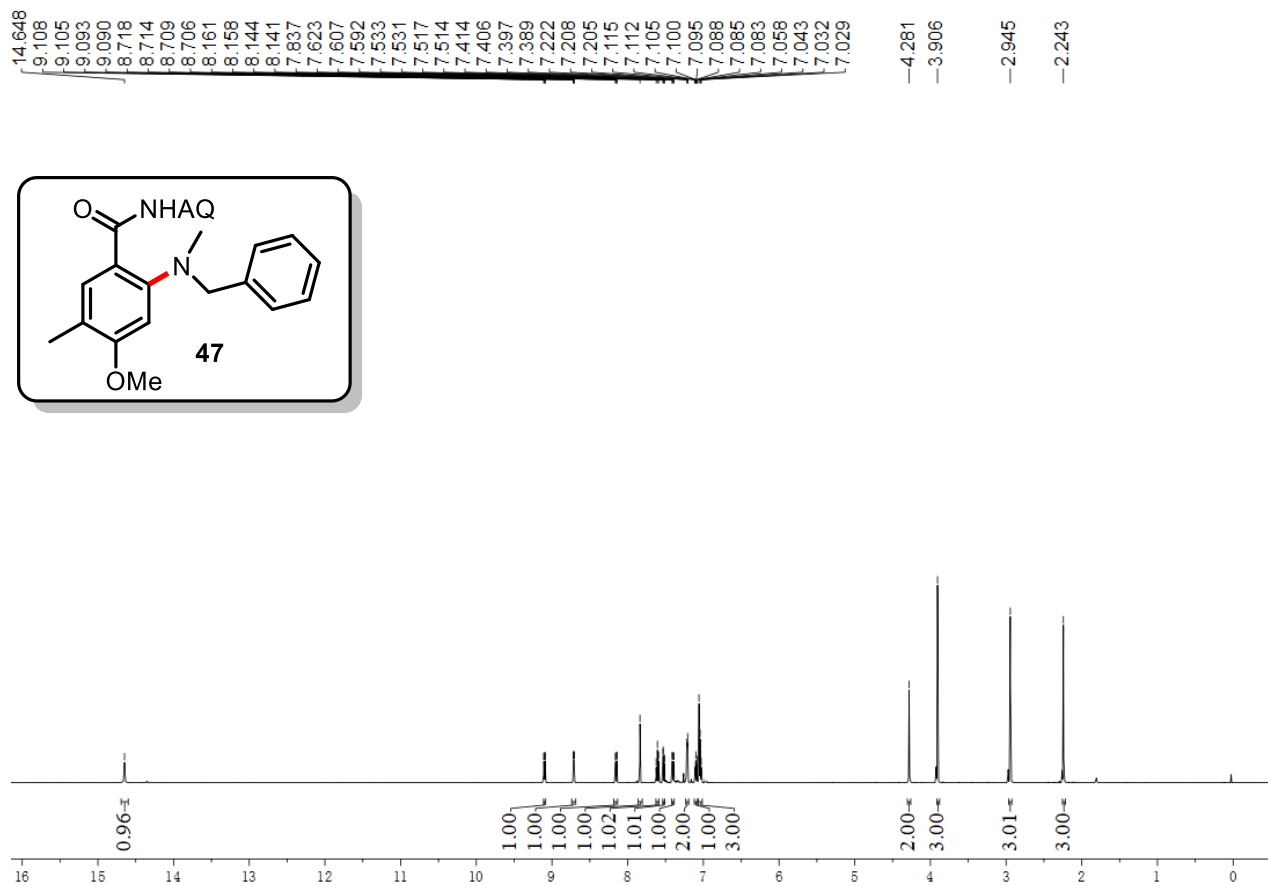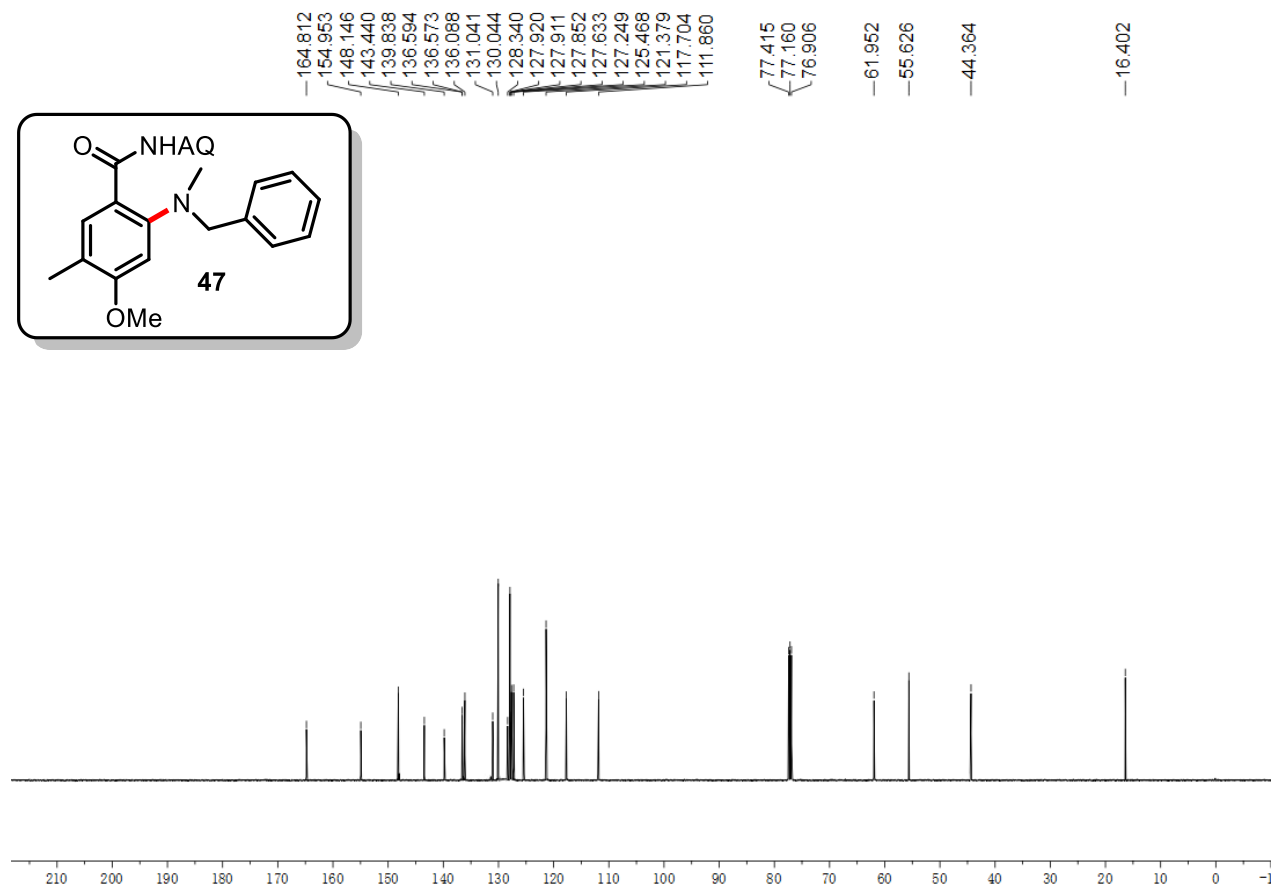

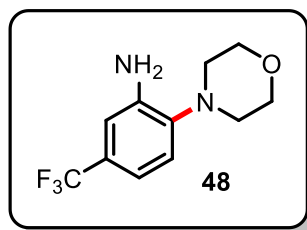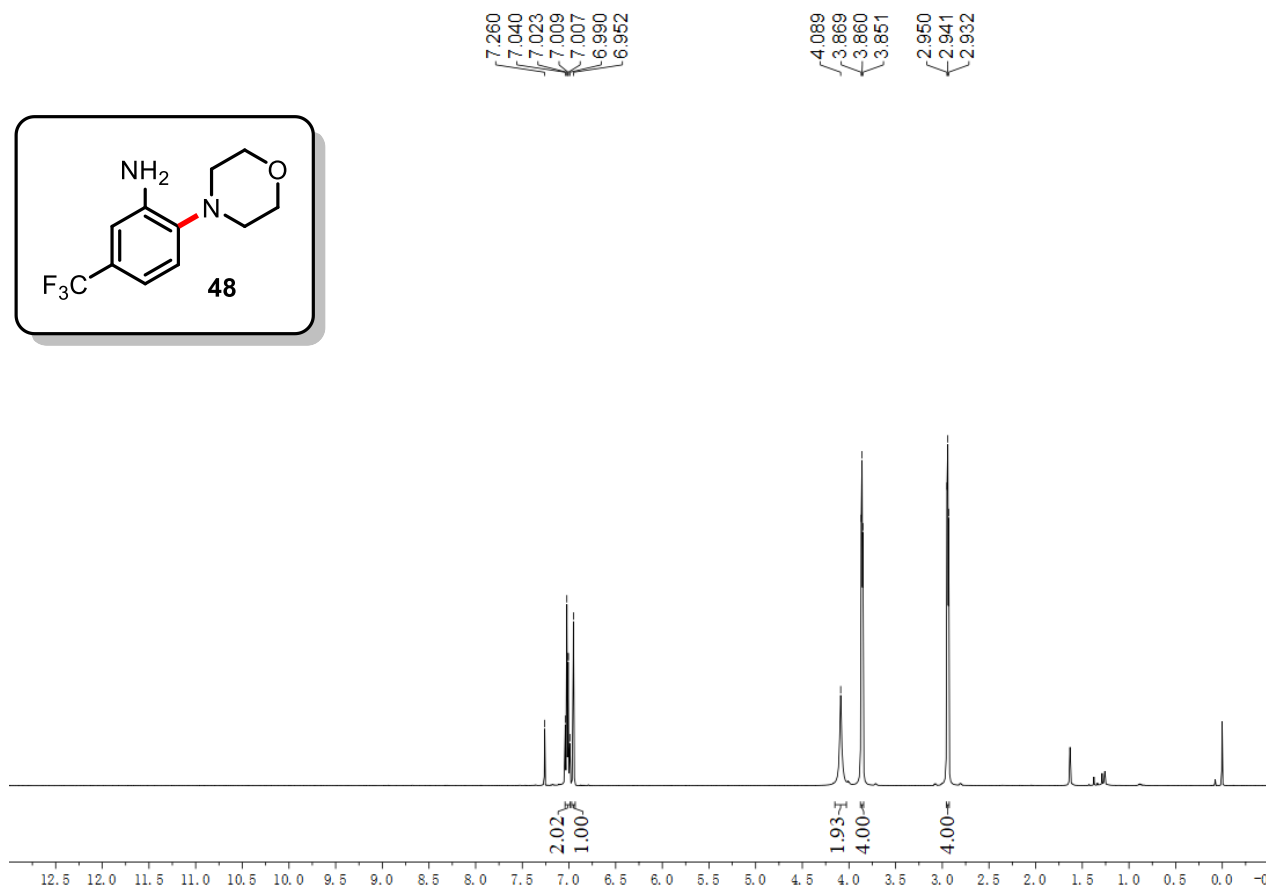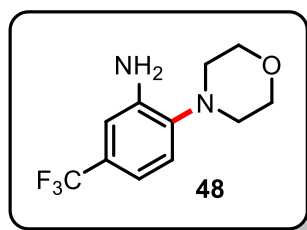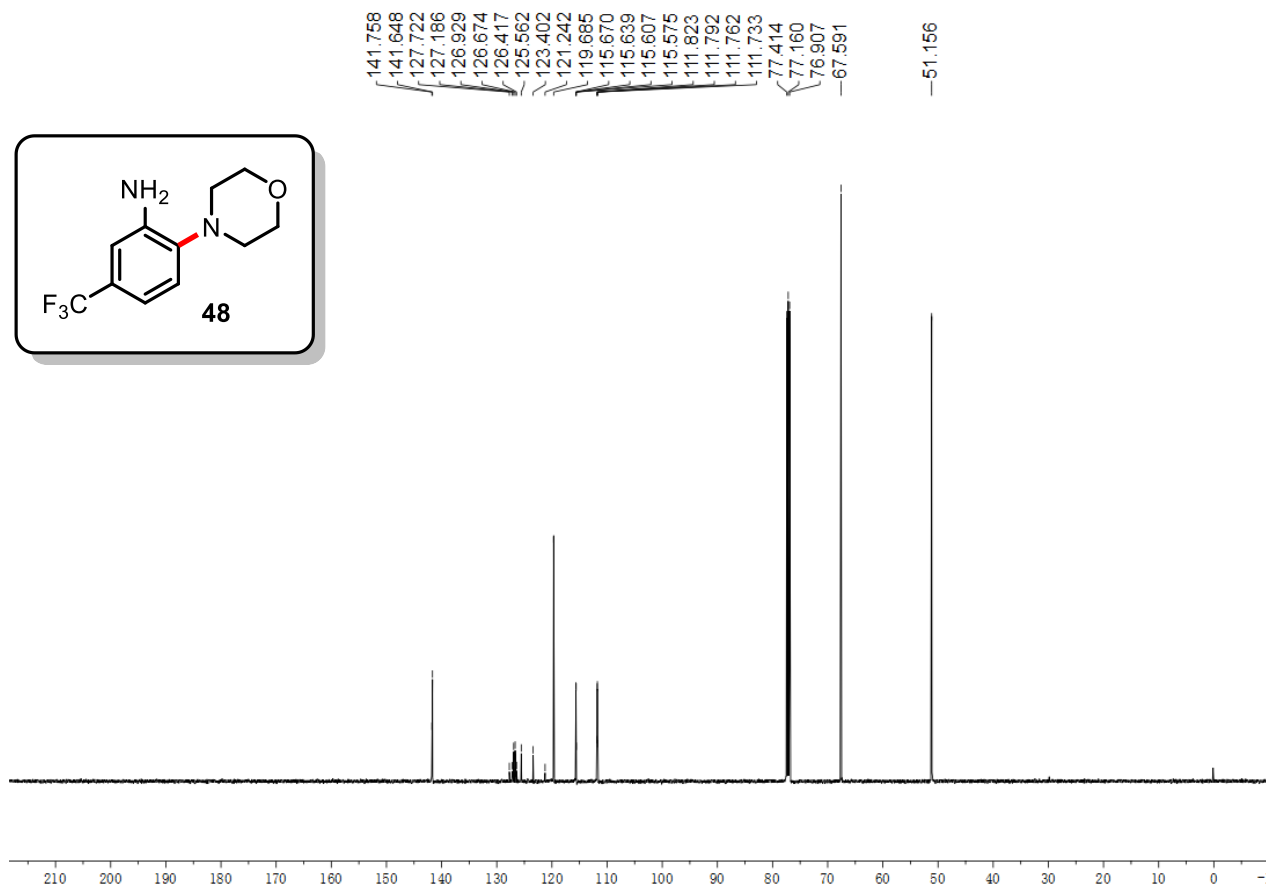

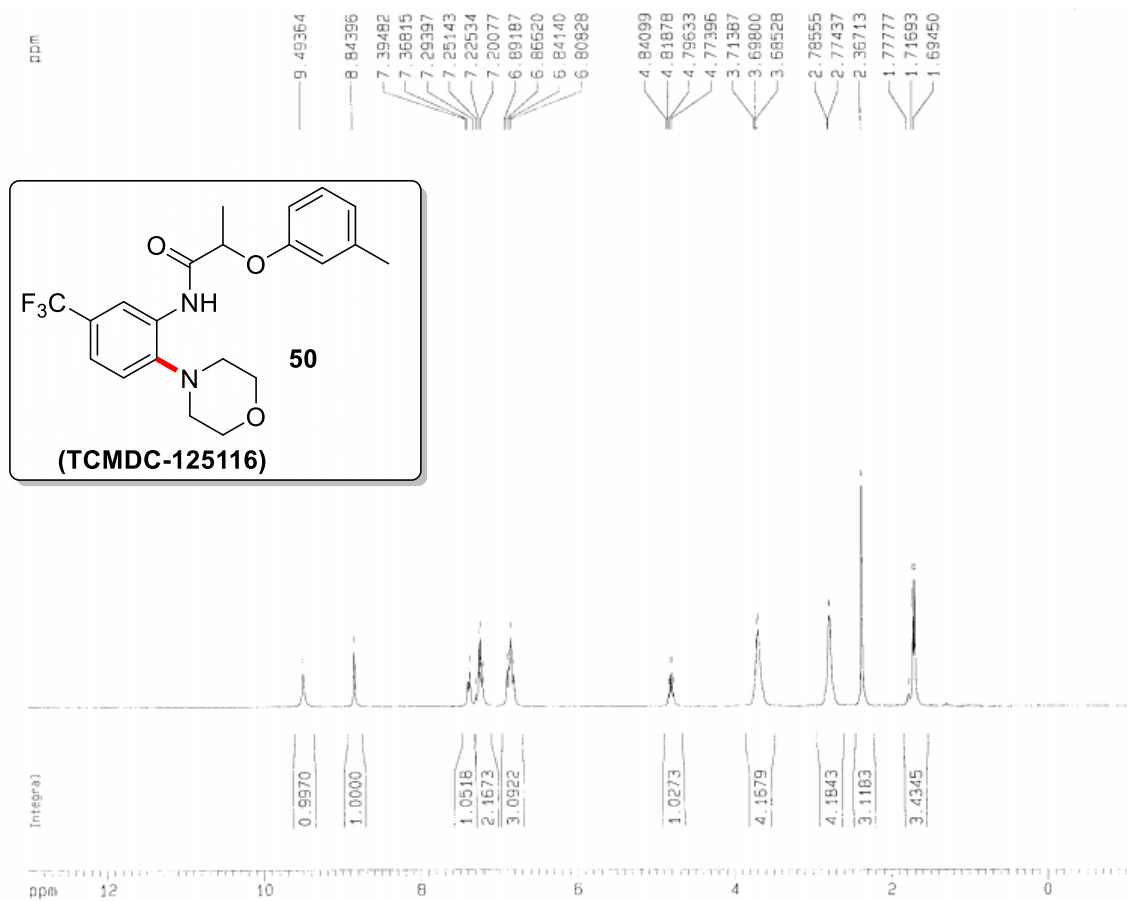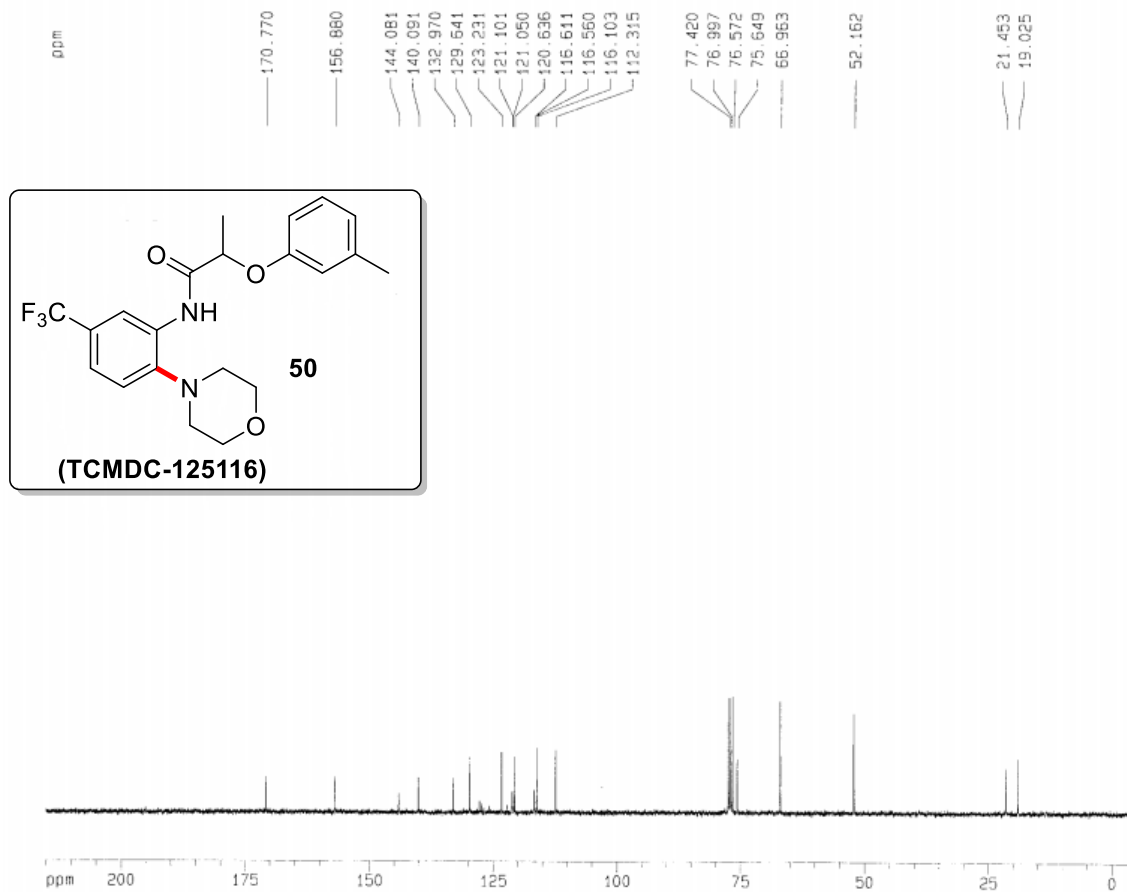

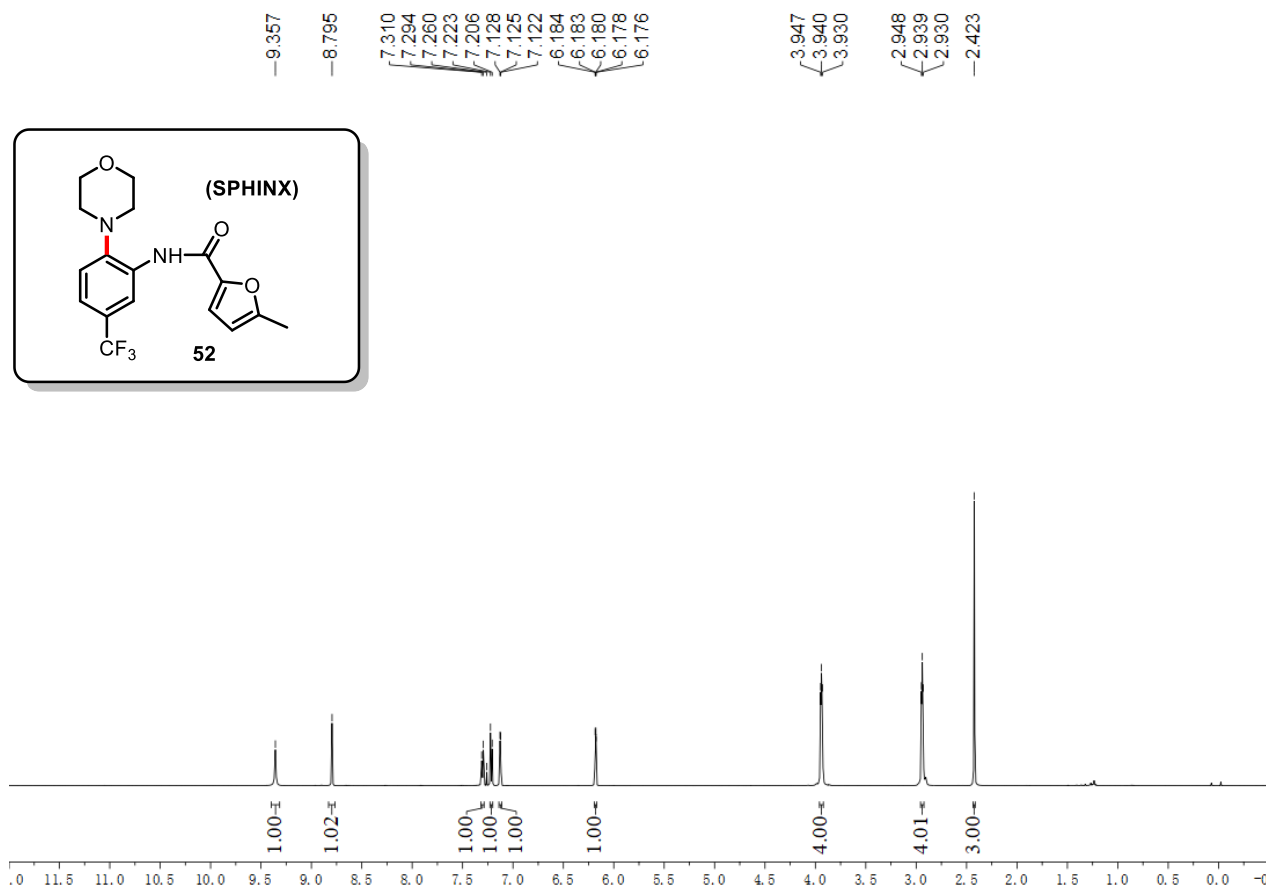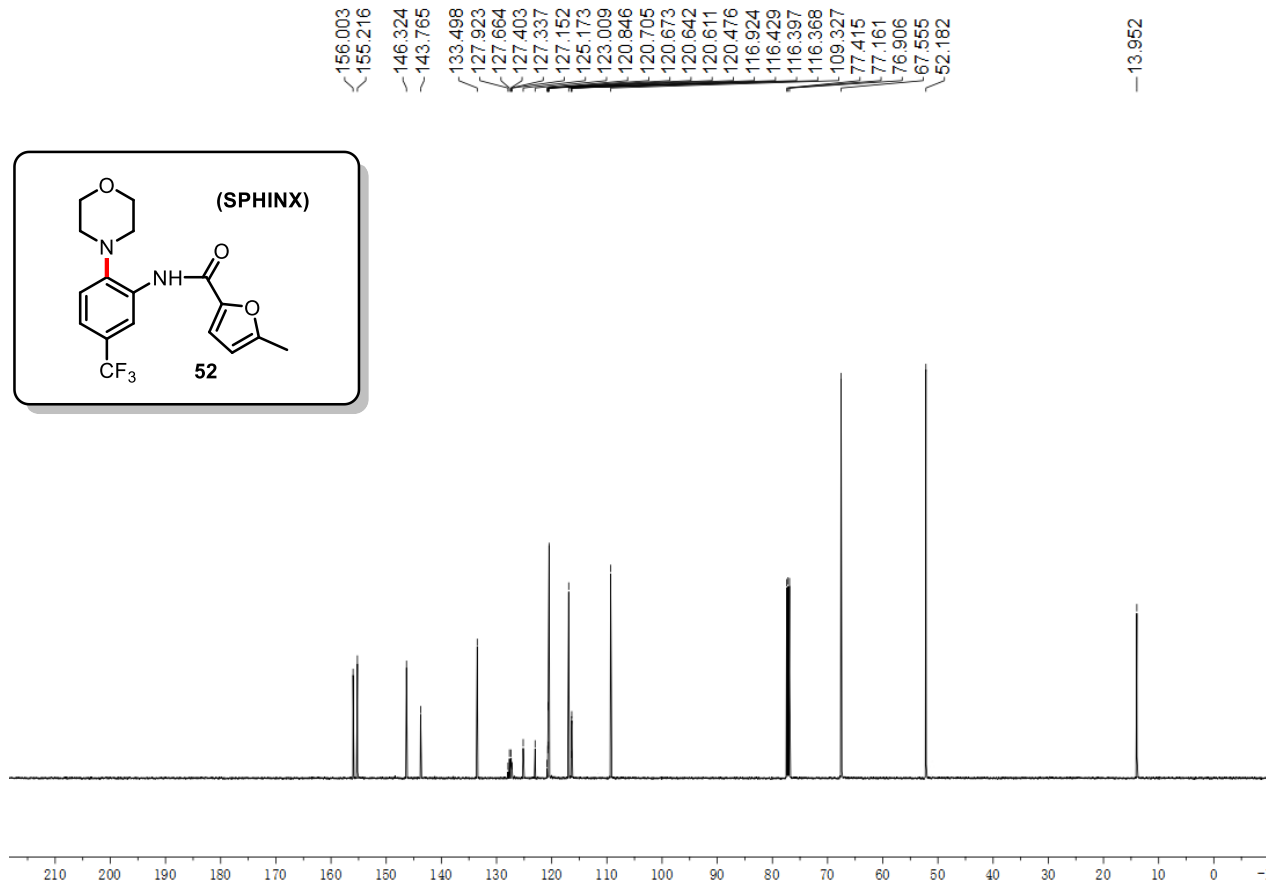

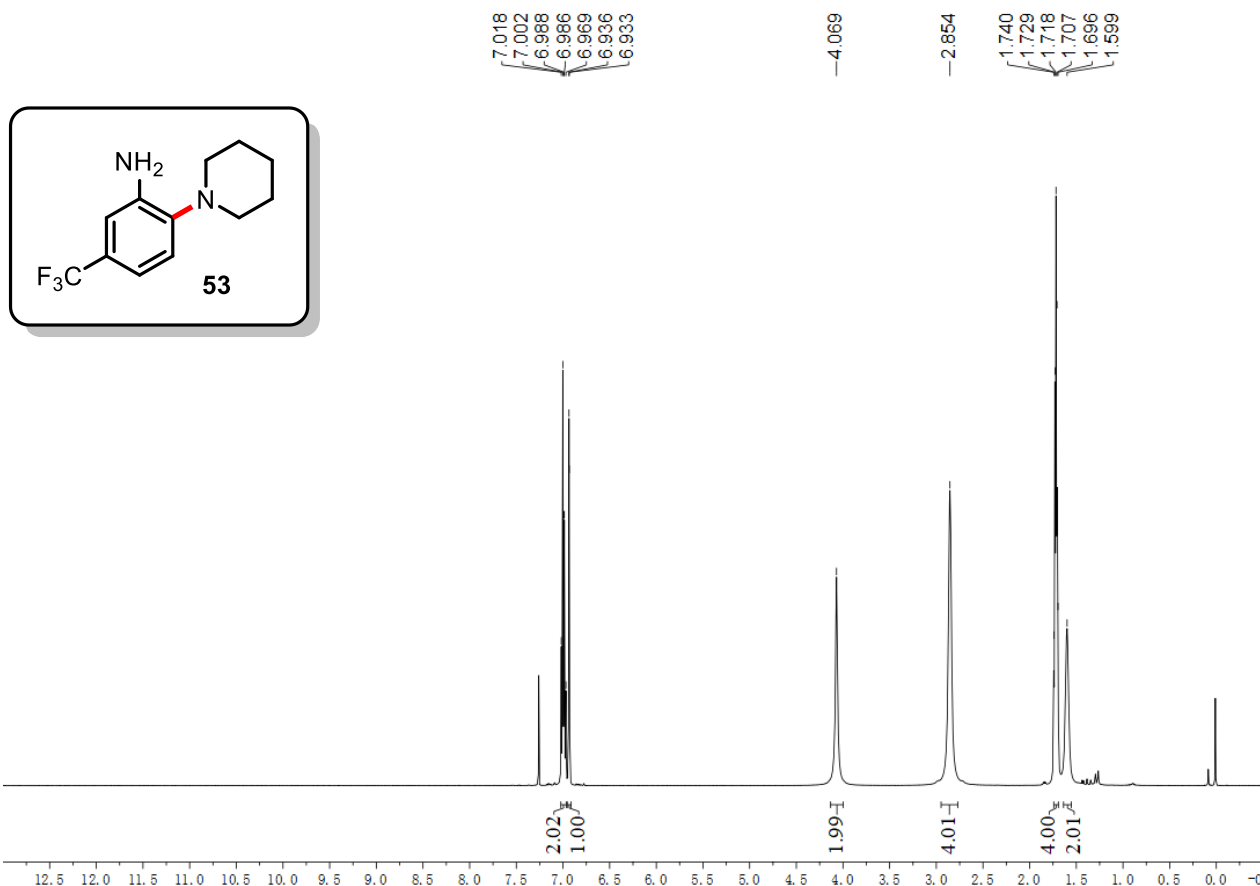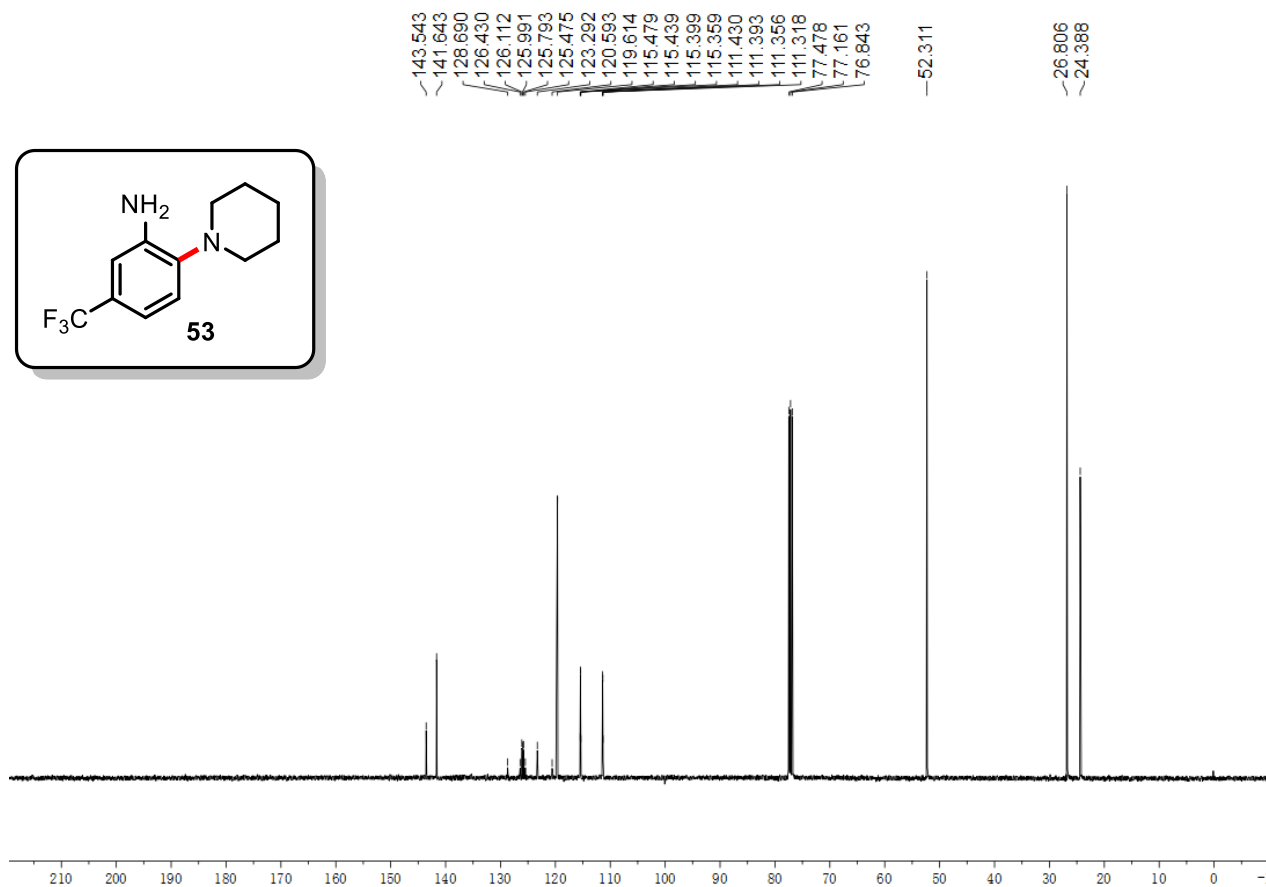

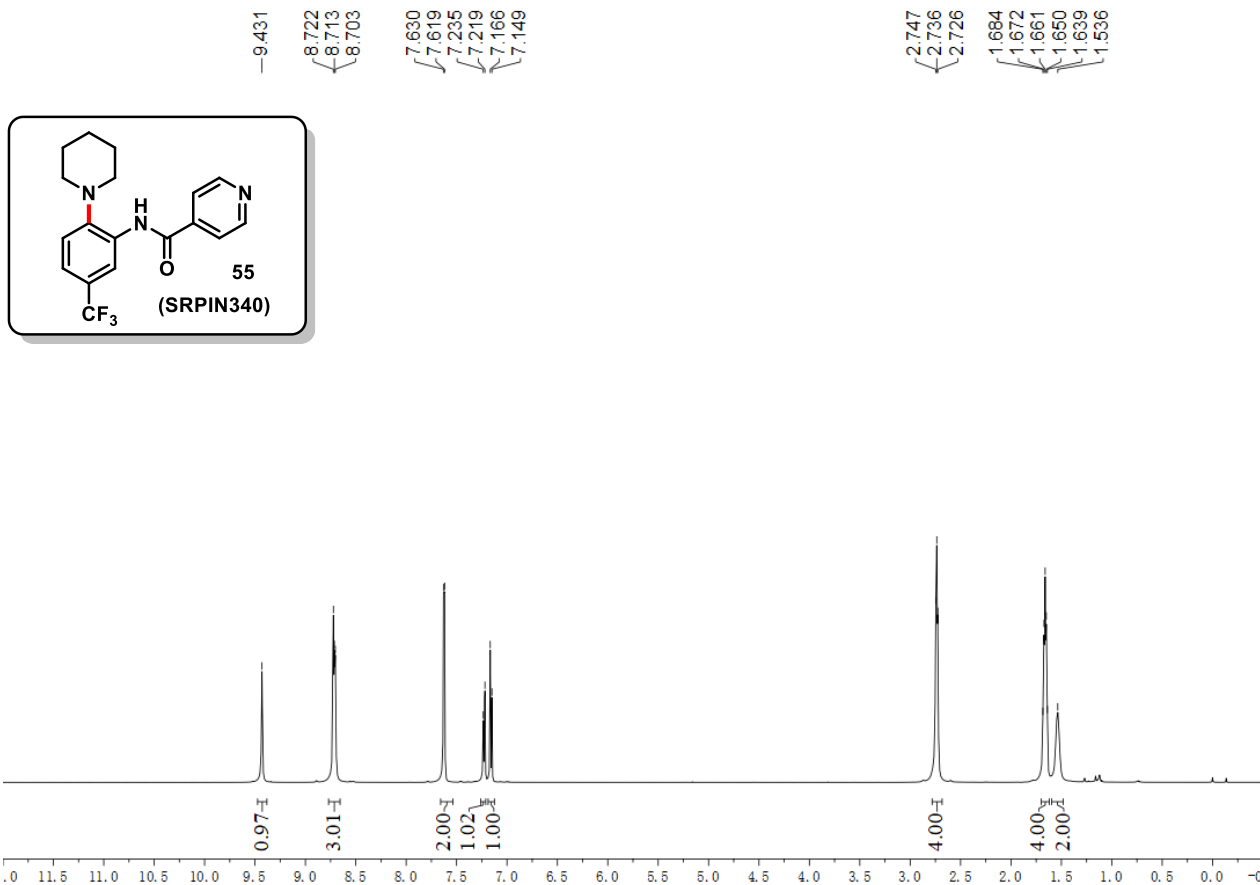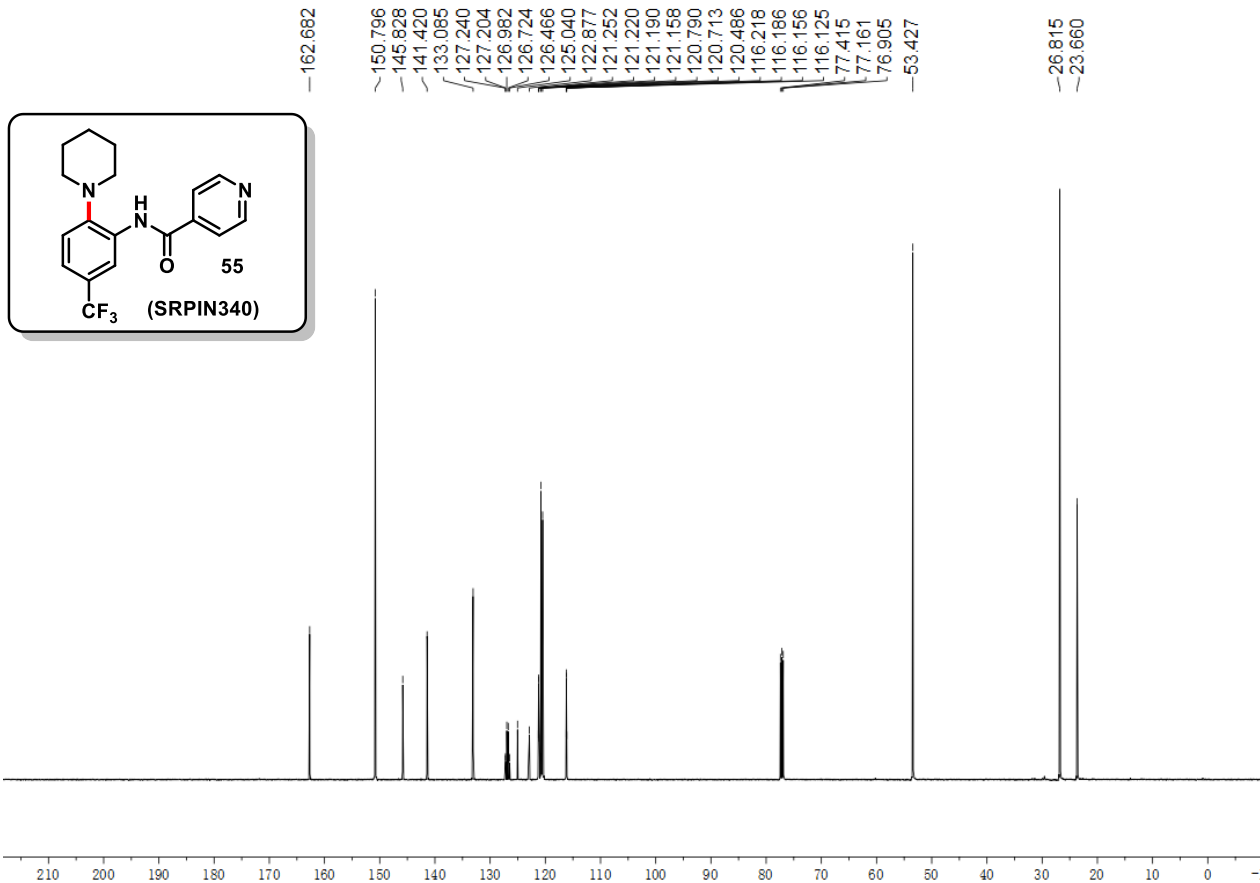

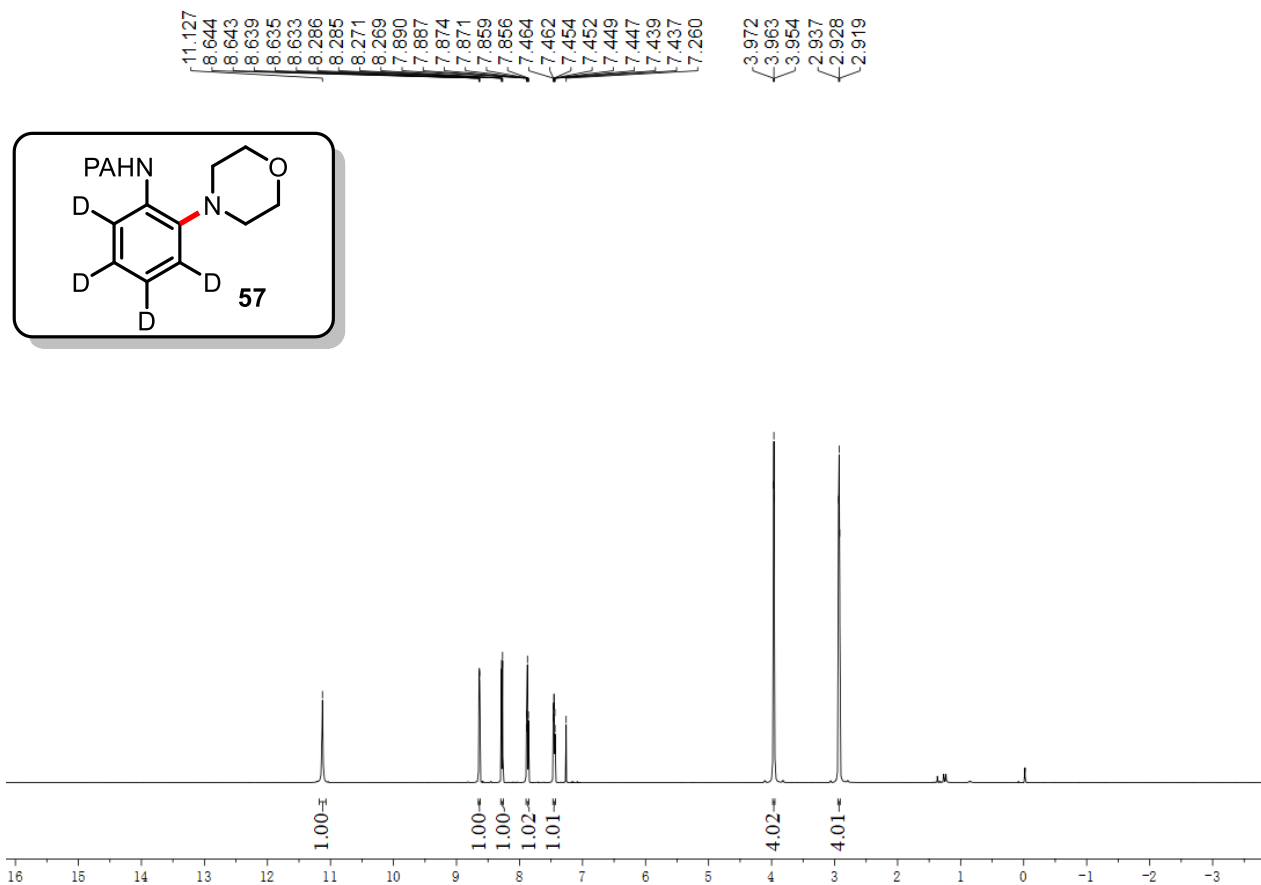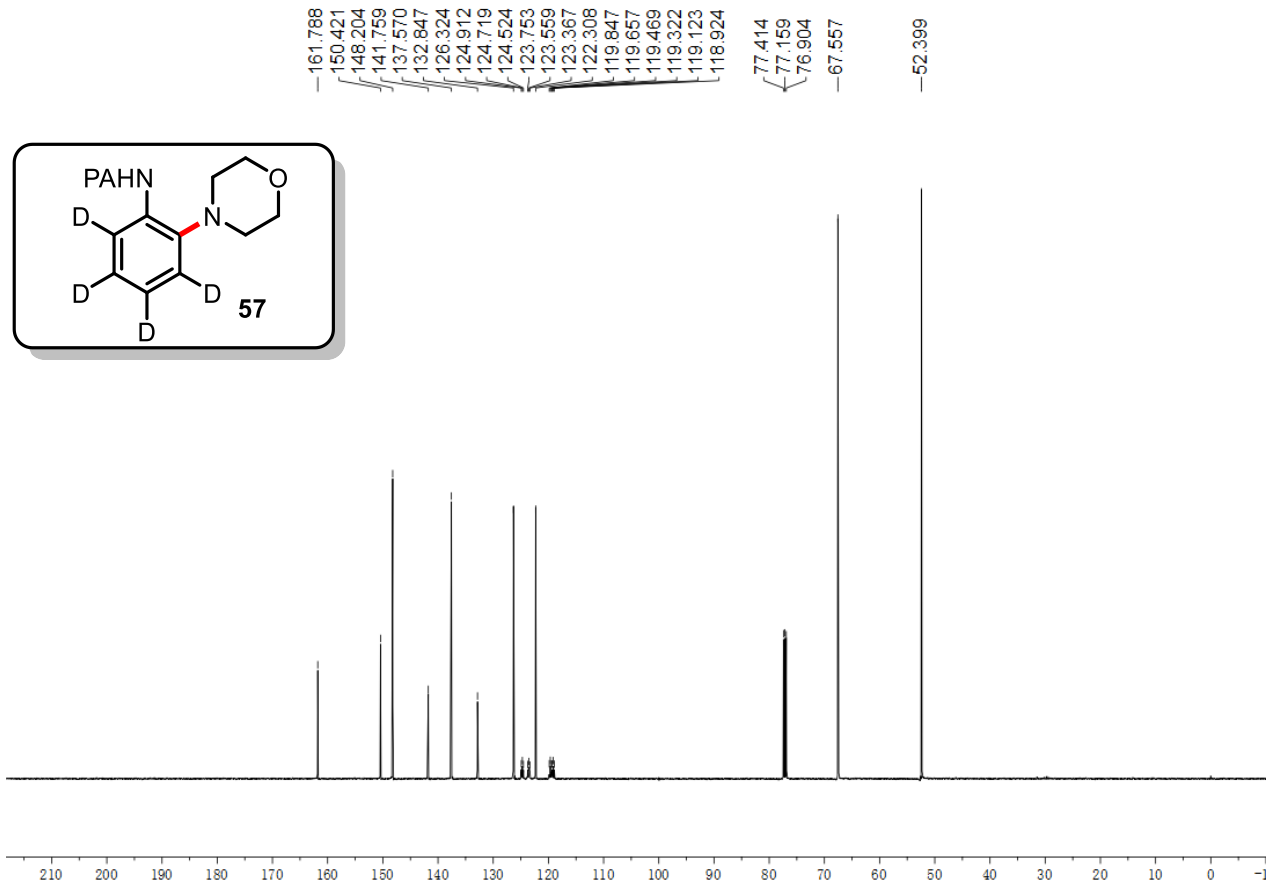

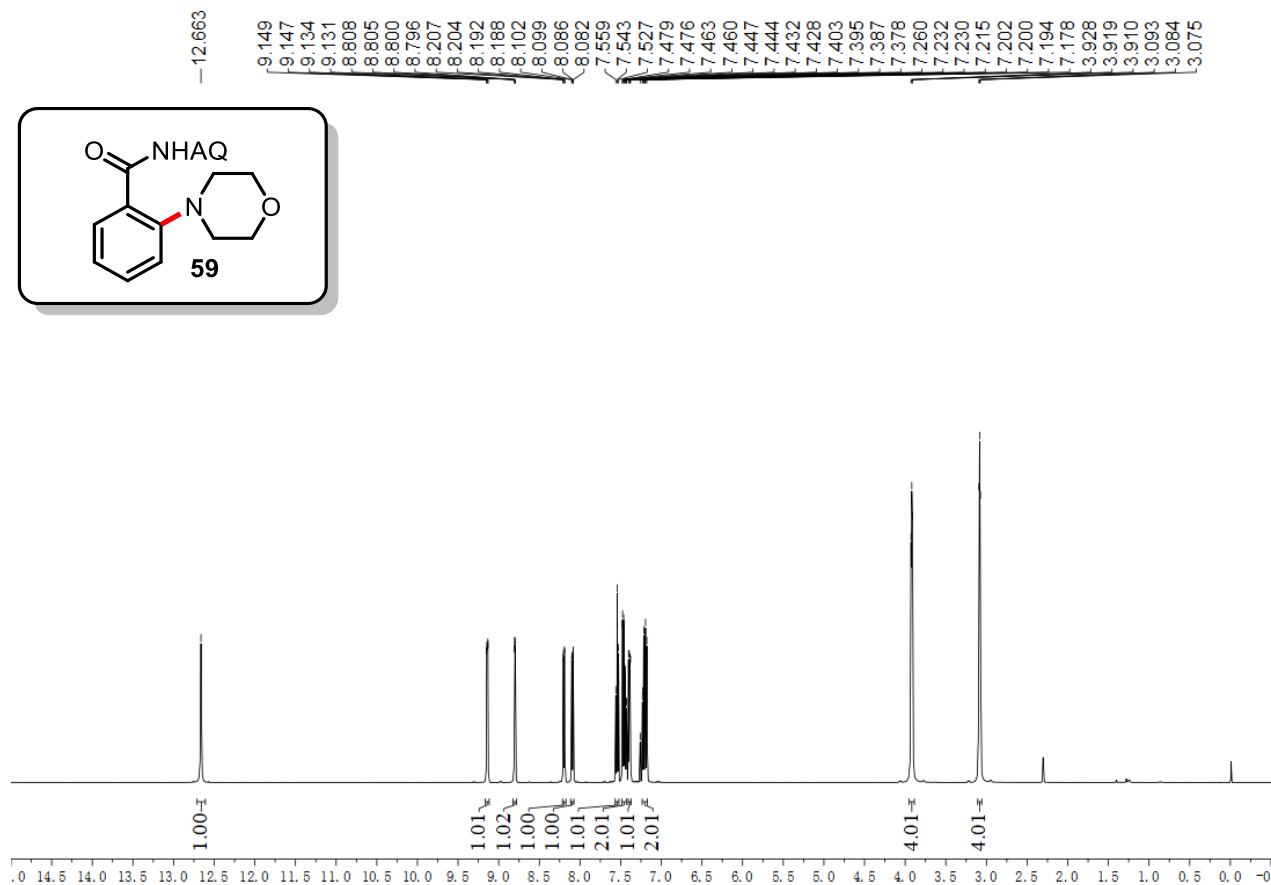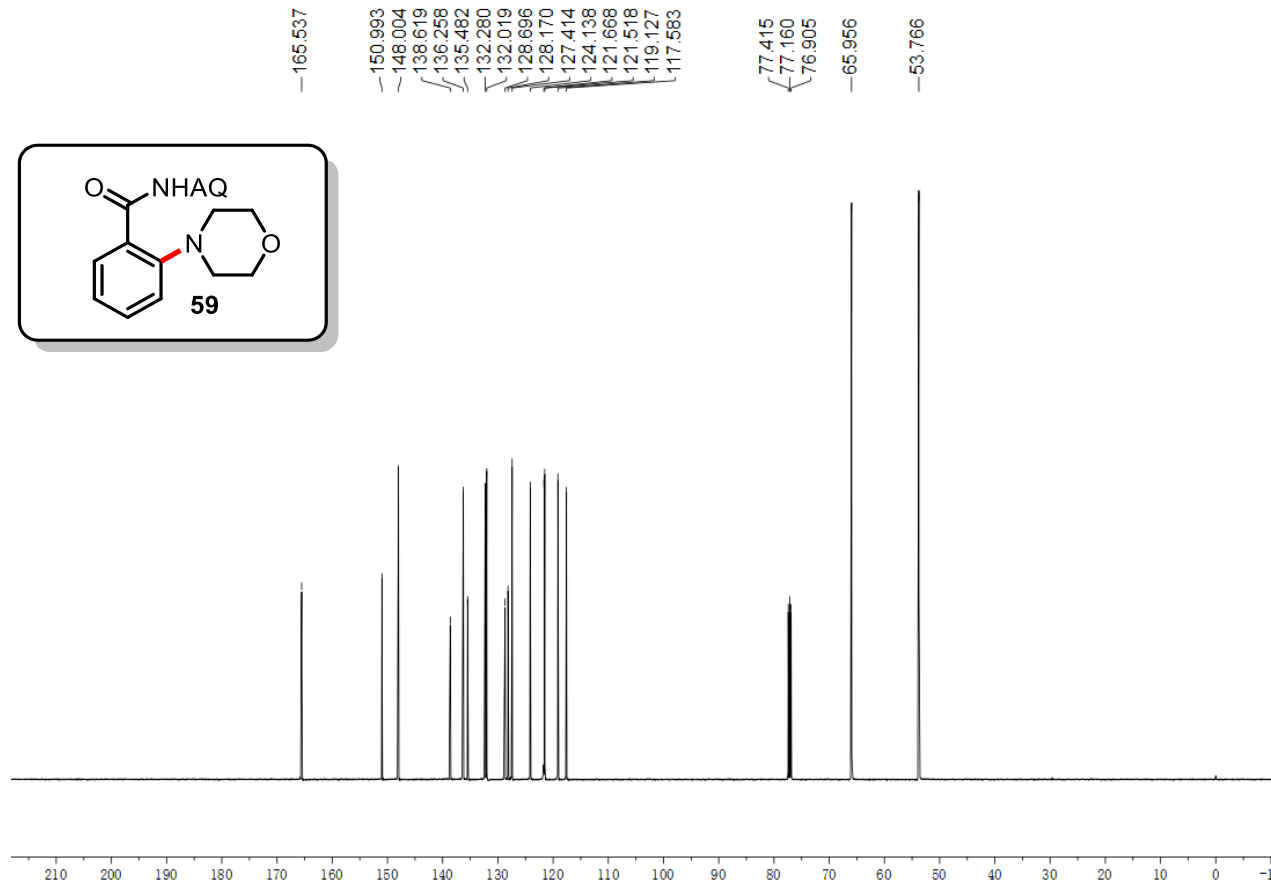



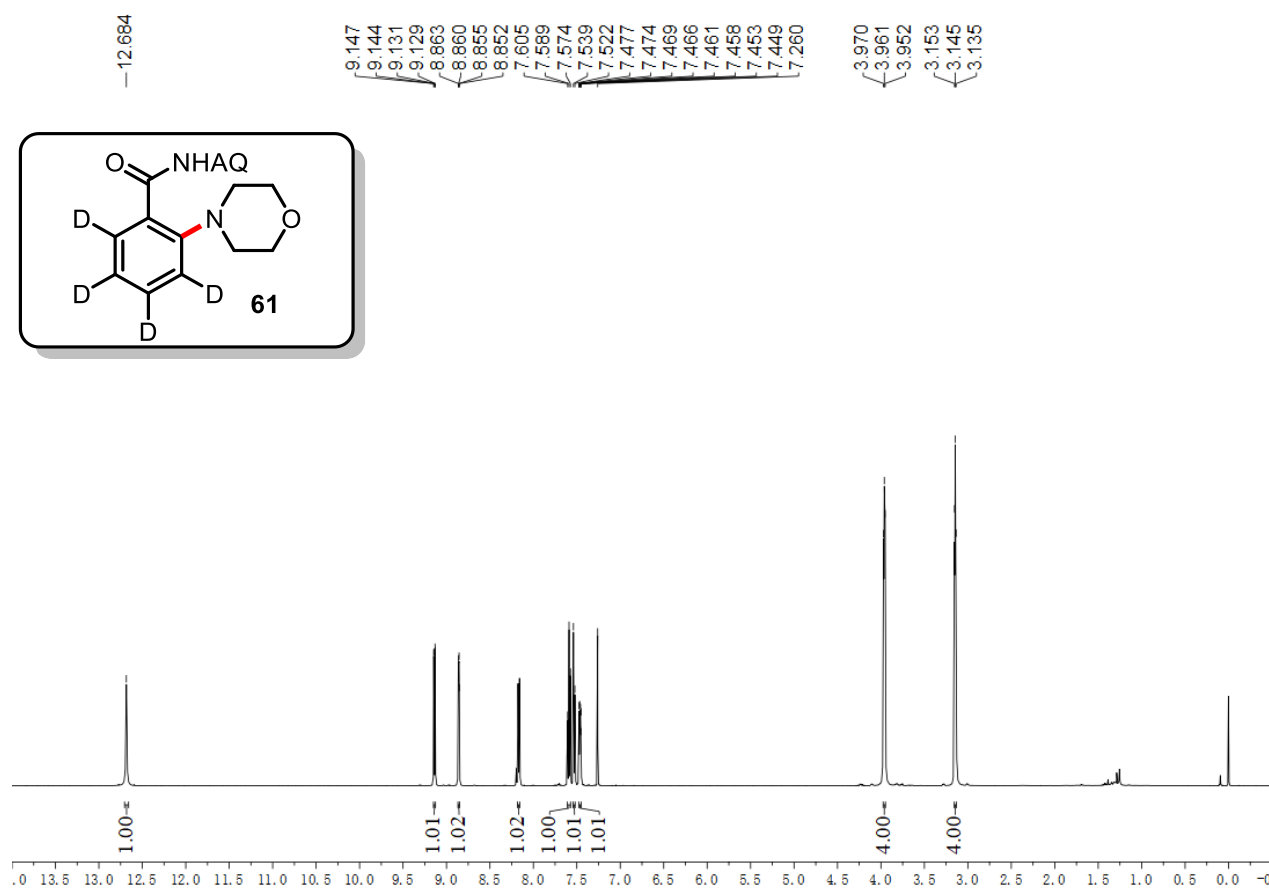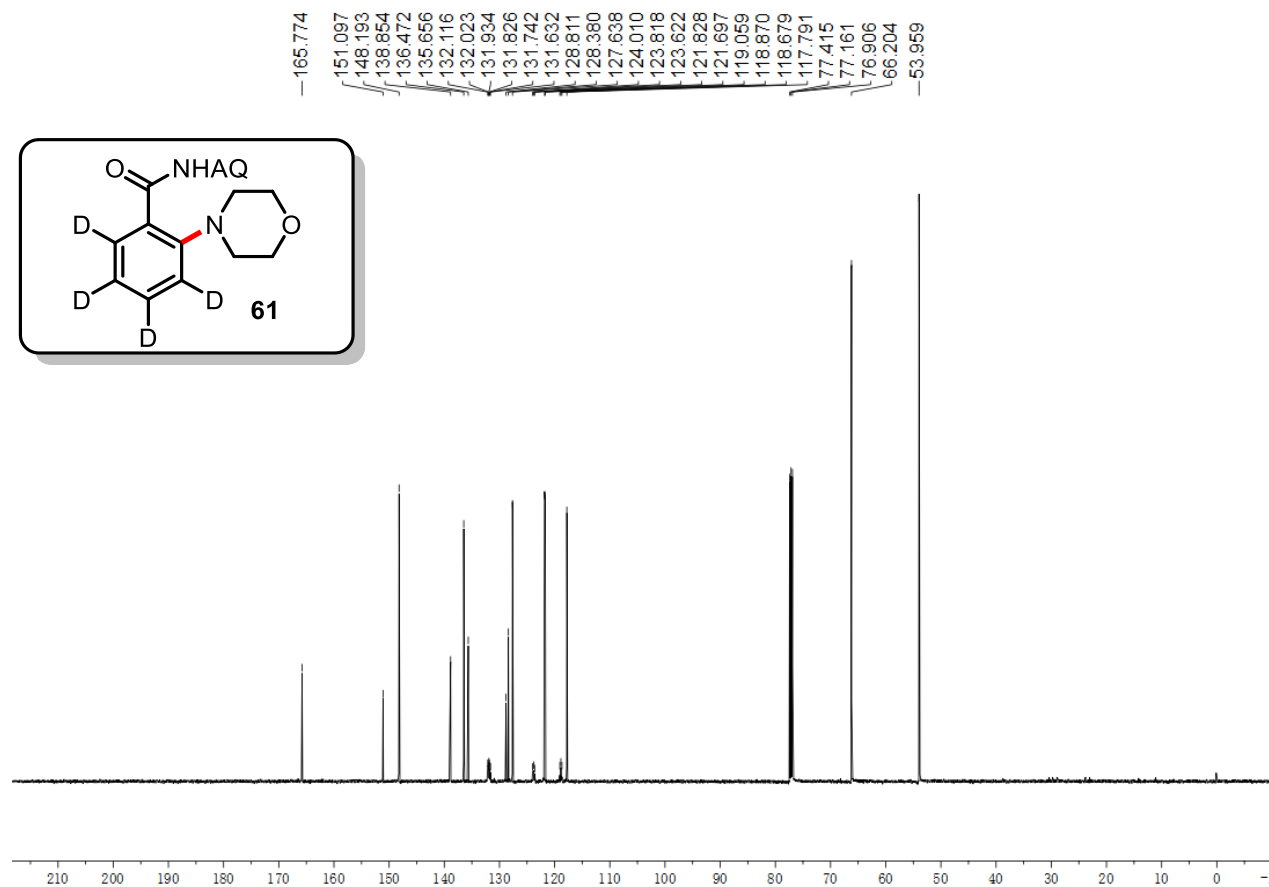

Supplement: d0ob00784f1.pdf [file d0ob00784f1.pdf]
